# Supplementary material for: Characteristics of the esophageal microbiota in patients with Achalasia
Source: Research Square preprint supplement (doi:10.21203/rs.3.rs-7849916/v1), 2025-10-27
Supplement: Supplementary file 1 [file 62b4b11640bdb5c98d90b865.xlsx]

## Sheet: TableS1
TableS1 Differences in microbial community composition at the phylum level between AC and healthy groups
	AC																																NC
ID	LLH	NCL	ZT	WCL	ZJY	LH	LXH	ZXB	HGT	SJ	WY	FN	WHP	YS	SYQ	ZF	ZMJ	SSZ	XSY	ZYING	LCH	ZYP	LX	YM	HYL	LQF	CDZ	BFF	CDY	YSF	MRH	WJG	LYP	ZJING	WYL	HYC	HYG	FYL	FJ	DSR	SQF	WSL	ZJ	WKX	LXL	HZY	WAY	WT	CYH
Firmicutes_D	0.0829872	0.371144	0.479093	0.609105	0.337637	0.452072	0.194147	0.792863	0.525527	0.346694	0.361264	0.259272	0.475614	0.481395	0.353215	0.158981	0.196002	0.626142	0.405618	0.373419	0.145245	0.612978	0.815461	0.0422394	0.0508783	0.0796315	0.560124	0.001145	0.270272	0.45596	0.139508	0.72794	0.362252	0.43645	0.559601	0.438182	0.103828	0.577396	0.707513	0.522099	0.312117	0.254417	0.293518	0.164154	0.638842	0.42806	0.0677292	0.320751	0.627426
Proteobacteria	0.167756	0.315326	0.214666	0.0777623	0.290961	0.3886	0.402633	0.0731587	0.141663	0.319798	0.279483	0.474301	0.125351	0.104	0.121079	0.424832	0.387636	0.0810439	0.168299	0.306747	0.236701	0.0901292	0.0697573	0.569489	0.162302	0.007543	0.178131	0.948503	0.235703	0.0238668	0.0230503	0.147309	0.0402566	0.146805	0.123131	0.261044	0.210358	0.26683	0.135257	0.176082	0.208637	0.532389	0.0460969	0.268995	0.132183	0.124558	0.522616	0.173695	0.165081
Actinobacteriota	0.00086023	0.182967	0.0462031	0.090607	0.0185809	0.00229996	0.0678252	0.0648213	0.176114	0.054703	0.110691	0.0905208	0.0646844	0.00148837	0.165042	0.149417	0.0939363	0.178185	0.20249	0.27002	0.176439	0.0689404	0.0640221	0.10006	0.00079731	0.136241	0.0833575	0	0.205387	0.151834	0.101895	0.0967504	0.411555	0.2527	0.107265	0.0607605	0.266714	0.042315	0.0295473	0.108634	0.302944	0.0793352	0.259057	0.14734	0.139268	0.126842	0.145535	0.314188	0.0558185
Firmicutes_A	0.0745693	0.0806666	0.168937	0.0855154	0.351885	0.0995845	0.104359	0.00345784	0.0429733	0.0888173	0.00704473	0.00017852	0.0997808	0.17907	0.0856246	0.0549669	0.178445	0.0513827	0.0921218	0	0.203379	0.100397	0.01153	0.00018069	0.236975	0.167445	0.0329715	0.0498972	0.0577561	0.0506404	0.309018	0.0068878	0.0960896	0.0629139	0.0488617	0.0250079	0.140347	0.023842	0.031347	0.0262017	0.0438907	0.0622665	0.0967636	0.00029421	0.015511	0.0873735	0.0272208	0.044983	0.0307702
Bacteroidota	0.552535	0.0380963	0.0418488	0.0747867	0.00025907	0.0338502	0.104856	0.0368778	0.0273184	0.0976234	0.0817526	0.0234404	0.0282145	0.212651	0.0841823	0.0980629	0.123621	0.0294261	0.0404409	0.0170695	0.0550499	0.052569	0.0189179	0.0725395	0.101445	0.151057	0.0971084	0.00026211	0.0436569	0.279582	0.137885	0.0179019	0.00437906	0.013767	0.0642835	0.185784	0.0895513	0.0334698	0.0326919	0.00868269	0.0649319	0.0348399	0.0908513	0.177099	0.0136135	0.0943905	0.0887141	0.0604325	0.050921
Fusobacteriota	0.0323445	0.00032149	5.083e-05	0.0169444	0.00017271	0	0.0700108	0.00380889	0.0252736	0.0824016	0.0666086	0.0395205	0.0161894	9.302e-05	0.125388	0.0299189	0.0199764	0.0227704	0.0544532	0.0324268	0.0896176	0.0457363	0.0115499	0.117837	0.108995	0.25656	0.0307905	8.277e-05	0.136867	0.00559514	0.224274	0.00012844	0.01331	0.00520341	0.0398305	0.0288261	0.0166559	0.0342888	0.0503333	0.0770531	0.0108494	0.00014946	0.0987186	7.355e-05	0.0398134	0.0865092	0.0701251	0.0107821	0.0163086
Firmicutes_C	0.02926	0.0110377	0.00613331	0.0446836	0	0.0232036	0.0478348	0.015569	0.0577448	0	0.072908	0.00017852	0.189801	0.00014884	0.0598459	0.00017742	2.951e-05	0.00576947	0.00908953	0.00015928	0.0691809	0.0209777	0.00507796	0.00027798	0.337872	0.181597	0.00385094	0	0.0123131	0.0293308	0.0575489	0.00017661	0.070449	0.0819822	0.0533662	0.00026822	0.172365	0.011102	0.0083658	0.029475	0.0564003	0.0361104	0.0923117	0.241898	0.0111067	0.0184172	0.0364643	0.061472	0.024669
Patescibacteria	0.00684494	2.679e-05	0.00892887	3.306e-05	0	0	0	0.00510777	0.00243739	0.00562915	0.0199671	0.0741524	0	0.00426047	0.00251944	0	0	0.00045215	0.00588048	0	3.039e-05	0.00696697	0.00306669	2.78e-05	0	0.0100737	0.0118425	0	0.019742	0.00299427	0.00098693	0.00282577	0	0	0.00148671	3.156e-05	0	0.0019656	0.0021755	0	0	8.968e-05	0.00986951	0	0	0.0179027	0.020747	0.00623688	0.0120871
Deinococcota	0.0526827	0.00024112	6.777e-05	0	0	0	0	0	0	0	0	0	0.00021917	0	0	0.0835954	0	0	0	0	0	0	0	0.0685088	0	0	0	0	0.00505801	0	0	0	0	0	0	0	0	0	3.955e-05	9.221e-05	4.932e-05	0	0	0	5.223e-05	0	0	0.00627764	0
Campylobacterota	0	0	0.013351	0.00019837	0	0	0.00186577	0	0.00029445	0.00425657	0	0.0382846	0	0	0.00049293	0	0	0	0	0	0	0.00046063	0.00019914	0.0285071	0	0.00415233	0	0	0	0	0.00052636	0	0	0	0.00139795	0	2.586e-05	0.0036218	0.00110753	0.0395715	0	0	0.00749046	0	0.00940062	0.00364228	0	0	0
Others	0.00015976	0.00017414	0.0207211	0.00036368	0.00050374	0.00038951	0.00646801	0.00433546	0.00065433	7.711e-05	0.00028123	0.00015105	0.00014611	0.016893	0.00261073	4.839e-05	0.00035409	0.004829	0.0216065	0.00015928	0.0243569	0.00084448	0.00041819	0.00033358	0.00073502	0.00570025	0.00182323	0.00011036	0.0132457	0.0001967	0.00530748	8.028e-05	0.00170937	0.00017943	0.00077664	9.467e-05	0.00015518	0.00516881	0.00162174	0.0121097	0.00018082	0.00040355	0.00532341	0.0001471	0.0002089	0.0123055	0.0208489	0.00118215	0.0169187
[truncated: 20 more columns]

## Sheet: TableS2
TableS2 Differences in microbial community composition at the Genus level between AC and healthy groups
ID	NC	AC
Rothia sp001808955	0.0476006	0.0318842
Streptococcus vestibularis	0.0192689	0.0493563
Peptostreptococcus stomatis	0.0164897	0.0233073
Haemophilus_A paraphrohaemolyticus	0.034595	0.00415977
Fusobacterium_C periodonticum_D	0.0101769	0.0234056
Pseudomonas_E_647464 veronii	0.013865	0.0173528
Ralstonia pickettii_B	0.0145293	0.00858791
Veillonella_A atypica	0.0126304	0.0101525
Prevotella melaninogenica	0.00787468	0.0135534
Parvimonas micra	0.00650173	0.0136682
Gemella morbillorum	0.00092739	0.0159663
Gemella sanguinis	0.00886146	0.00454523
Bulleidia moorei	0.00610918	0.00669469
Porphyromonas_A_859423 pasteri	0.00617143	0.00623105
Staphylococcus hominis	0.00491988	0.00741641
Lancefieldella sp000564995	0.00573786	0.00555648
Acinetobacter bereziniae	0.00337413	0.00790543
Streptococcus anginosus	0.00020191	0.010516
Porphyromonas_A_859424 endodontalis	0.00414853	0.00634108
Fusobacterium_C nucleatum	0.00235672	0.00796348
Acinetobacter johnsonii	0.00683701	0.00304303
Brevundimonas nasdae_A	0.00225974	0.00645167
Actinomyces graevenitzii	0.00510223	0.00357099
Alloprevotella sp900095835	0.00505609	0.00361154
Veillonella_A rogosae	0.00398493	0.0046609
Mogibacterium diversum	0.00473345	0.00383188
Streptococcus parasanguinis	0.00638167	0.00165621
Neisseria subflava	0.00419126	0.00368205
Allisonella pneumosintes	6.221e-05	0.00777427
Oribacterium sinus	0.00434368	0.00338757

## Sheet: TableS3
TableS3 alpha diversity between AC and healthy groups
Sample	Chao1	Observed_species	Shannon	Simpson	Group
LLH	140.604	130.3	3.55007	0.824948	AC
NCL	132.197	123.8	4.38195	0.909392	AC
ZT	171.278	165.5	4.58725	0.87265	AC
WCL	250.978	241.3	5.20294	0.929688	AC
ZJY	85.2954	79.9	3.73934	0.895346	AC
LH	108.972	107.6	4.69904	0.945991	AC
LXH	210.486	203.1	5.29401	0.945326	AC
ZXB	136.267	133.3	4.07122	0.836299	AC
HGT	287.923	280.4	4.67613	0.838583	AC
SJ	130.367	126.4	4.73044	0.91832	AC
WY	99.5474	94.6	4.47535	0.927084	AC
FN	73.7518	69.2	4.25517	0.93216	AC
WHP	163.322	156.7	4.89906	0.941584	AC
YS	314.232	306	5.8568	0.953562	AC
SYQ	421.129	410.4	5.81947	0.935001	AC
ZF	82.5229	79	4.14108	0.922575	AC
ZMJ	91.1183	85.7	4.52349	0.935974	AC
SSZ	248.336	240.9	4.69185	0.849487	AC
XSY	140.913	135.9	5.02574	0.914914	AC
ZYING	47.0354	46	2.94692	0.817872	AC
LCH	87.9539	82.9	4.47362	0.944638	AC
ZYP	242.142	238.4	4.75546	0.832774	AC
LX	335.439	331.7	3.33563	0.599646	AC
YM	59.6615	54	3.86168	0.901689	AC
HYL	96.1933	89.5	3.89749	0.913106	AC
LQF	891.173	889.8	6.88437	0.971037	AC
CDZ	224.606	218.5	5.10177	0.890937	AC
BFF	38.7504	35.8	3.05818	0.870174	AC
CDY	223.999	215	5.63765	0.954612	AC
YSF	438.041	432.6	5.3383	0.920161	AC
MRH	466.555	461.8	6.0866	0.952685	AC
WJG	116.126	111.5	3.03948	0.622881	AC
LYP	185.903	182.9	5.2481	0.950998	NC
ZJING	120.759	118.3	4.89336	0.920427	NC
WYL	353.934	351.6	5.05314	0.874031	NC
HYC	54.4065	51.9	3.42429	0.869219	NC
HYG	80.9362	75	3.67147	0.902764	NC
FYL	177.263	174.4	4.16107	0.868385	NC
FJ	328.48	325.2	3.17985	0.585768	NC
DSR	69.2877	67.7	4.23774	0.912346	NC
SQF	129.485	121.5	4.93794	0.952045	NC
WSL	75.1253	69.7	4.13957	0.9288	NC
ZJ	477.453	476.5	6.58344	0.972035	NC
WKX	42.579	39.1	2.74157	0.831069	NC
LXL	95.3337	94.7	4.19321	0.893002	NC
HZY	250.22	247.7	5.54777	0.908531	NC
WAY	89.2002	85.4	5.00835	0.959202	NC
WT	370.773	365.6	5.81177	0.9488	NC
CYH	269.174	257.9	4.68506	0.847764	NC
ZP	629.665	621.8	6.5429	0.977101	NC
GYL	64.8322	58.2	3.12746	0.869364	NC
LM	138.897	127.5	4.93047	0.940753	NC
GJL	202.967	189.5	5.71096	0.964011	NC
SQQ	126.913	116.7	4.68258	0.9326	NC
LZH	88.1519	85.1	4.23496	0.902438	NC
LHB	92.5218	87.6	3.81283	0.864974	NC
ZQC	67.3398	58.6	4.03467	0.925218	NC
ZCM	268.631	260	5.25115	0.923508	NC
CP	214.569	211.4	3.64485	0.749104	NC
ZY	69.8582	68.3	3.82242	0.906596	NC
LYB	249.919	236.3	5.76902	0.959539	NC
ZW	142.375	131.4	5.00871	0.950486	NC
HJ	61.9135	58.1	3.98832	0.92287	NC
CXH	108.201	97	4.5586	0.947054	NC
CL	74.7812	68.4	4.51042	0.950001	NC
LL	127.668	119.7	4.1988	0.866926	NC
SYN	84.5607	80.5	4.25461	0.927211	NC
ZQ	51.3067	47.6	3.8523	0.917618	NC
TM	63.3214	62.4	2.37826	0.701783	NC

## Sheet: TableS4
TableS4 beta diversity between AC and healthy groups --bray_curtis_distance
ID	Group	PCo1	PCo2	PCo3
LLH	AC	0.276366	0.051104	-0.048167
NCL	AC	-0.117317	0.234185	0.070339
ZT	AC	-0.218856	0.188797	0.030234
WCL	AC	-0.13942	-0.167577	0.204874
ZJY	AC	0.223338	-0.053929	0.241998
LH	AC	0.139098	-0.156723	0.340296
LXH	AC	-0.043041	-0.11965	-0.174357
ZXB	AC	-0.122331	-0.106818	0.338248
HGT	AC	-0.322734	0.027029	-0.078399
SJ	AC	-0.046719	0.000988	-0.081443
WY	AC	-0.032749	0.127786	-0.008056
FN	AC	0.249843	0.002447	0.25582
WHP	AC	-0.036126	-0.088314	0.00065
YS	AC	-0.07513	-0.034987	0.24423
SYQ	AC	-0.221899	-0.044742	-0.080148
ZF	AC	0.299608	0.156327	-0.028993
ZMJ	AC	0.055311	0.019321	-0.104138
SSZ	AC	-0.308822	0.085741	-0.073279
XSY	AC	-0.20713	0.161898	0.007199
ZYING	AC	-0.117548	0.244762	0.039313
LCH	AC	0.245857	-0.103112	-0.301084
ZYP	AC	-0.300424	0.071934	-0.084355
LX	AC	-0.331324	0.118648	-0.045497
YM	AC	0.353821	0.183526	-0.004037
HYL	AC	0.329253	0.039206	-0.081188
LQF	AC	0.11422	-0.383466	-0.210764
CDZ	AC	-0.30577	0.101162	-0.03894
BFF	AC	0.481544	0.293176	-0.016193
CDY	AC	-0.103366	-0.095602	-0.164298
YSF	AC	-0.032168	-0.180834	-0.075337
MRH	AC	0.080947	-0.267208	-0.294026
WJG	AC	0.144708	-0.231791	0.329555
LYP	NC	-0.024041	-0.295436	0.034395
ZJING	NC	-0.174614	-0.030536	0.050388
WYL	NC	-0.290751	-0.099203	0.001167
HYC	NC	0.211051	0.121946	-0.100232
HYG	NC	0.389987	0.089322	-0.094895
FYL	NC	-0.246773	0.103948	0.031516
FJ	NC	-0.319947	0.087457	-0.093342
DSR	NC	-0.156778	0.134467	0.002312
SQF	NC	0.013172	-0.148122	0.044697
WSL	NC	0.28972	0.15859	0.017221
ZJ	NC	-0.052493	-0.304902	-0.010233
WKX	NC	0.108265	0.0491	0.050649
LXL	NC	-0.161422	0.12841	0.062498
HZY	NC	-0.263248	0.009691	-0.10039
WAY	NC	0.115551	-0.015636	-0.036776
WT	NC	-0.16389	-0.152463	-0.038372
CYH	NC	-0.299547	0.075063	-0.028226
ZP	NC	0.087626	-0.38449	-0.084927
GYL	NC	0.207054	0.291696	0.074157
LM	NC	0.11057	-0.288074	0.191915
GJL	NC	-0.02108	-0.155104	-0.076759
SQQ	NC	-0.08789	0.048436	0.17228
LZH	NC	-0.065952	0.182633	0.050329
LHB	NC	-0.218996	0.16783	-0.038411
ZQC	NC	0.281859	0.050745	-0.049597
ZCM	NC	-0.203127	-0.044638	-0.029351
CP	NC	0.075796	-0.128047	-0.15046
ZY	NC	0.052848	0.256564	0.118901
LYB	NC	-0.091338	-0.084277	-0.02624
ZW	NC	0.081175	-0.246121	0.160051
HJ	NC	0.226279	0.058769	-0.071576
CXH	NC	0.085403	-0.030536	-0.021003
CL	NC	0.225311	0.019454	-0.022709
LL	NC	-0.260866	0.12258	-0.048575
SYN	NC	-0.003175	0.064113	0.145751
ZQ	NC	0.400728	0.158764	-0.15196
TM	NC	0.232489	-0.045281	-0.044249

## Sheet: Table S5
TableS5 Differences in microbial community composition at the phylum level between Type I and Type II AC
	I										II
	NCL	ZT	ZJY	LXH	ZXB	HGT	YS	LX	HYL	WJG	LLH	WCL	LH	SJ	WY	FN	WHP	SYQ	ZF	ZMJ	SSZ	XSY	ZYING	LCH	ZYP	YM	LQF	CDZ	BFF	CDY	YSF	MRH	P Value
p__Actinobacteriota	54	2647	293	1899	1247	7684	21	1291	15	4234	0	2534	87	8	100	162	962	2489	9068	5821	3757	0	12997	16	517	0	1283	570	0	7295	3285	441	0.748965
p__Bacteroidota	1758	1242	0	3011	325	241	0	178	13	644	20	1106	0	2050	0	0	197	1480	705	1853	135	0	1284	8	1030	1152	1872	1657	0	482	8681	2869	0.465758
p__Firmicutes_A	2068	1048	2323	5554	190	2127	4	438	9390	0	4216	3644	3762	623	492	2	2880	3128	890	4883	1650	1944	0	7949	2846	2	3761	1126	3	2589	1199	9143	0.79412
p__Firmicutes_C	24	316	0	1890	235	1815	3	79	19961	0	2277	1342	1241	0	4906	0	6977	2218	11	0	69	0	0	2728	492	0	5144	8	0	579	688	1108	0.460148
p__Firmicutes_D	24240	25913	23188	8900	43914	30423	18409	38610	4028	42485	4964	34542	16801	20465	24782	15762	14020	17566	8195	13244	30728	20800	26364	9254	28368	3025	2771	30589	79	14984	19041	4151	0.0315629
p__Fusobacteriota	0	0	9	3525	0	1214	5	201	8325	0	0	483	0	3271	3879	2729	1081	5653	0	6	542	862	2429	4193	580	2978	6298	760	0	6171	61	7080	0.348492
p__Proteobacteria	9250	8407	10411	18339	3194	3465	2528	2358	11816	5888	13235	3145	8945	18946	16039	11730	4162	2377	24640	16298	3271	6394	16753	13665	3516	15869	213	5583	46832	11807	904	441	0.321861
p__Verrucomicrobiota	2	0	0	0	0	0	0	0	34	3	4	4	11	0	0	0	0	0	0	0	0	6	0	0	0	19	17	9	8	13	0	0	0.936647
p__unclassified_Bacteria	0	5	4	5	0	0	0	0	7	0	0	0	0	5	6	0	5	0	0	6	0	4	9	3	0	5	0	0	0	0	0	0	0.893607

## Sheet: Table S6
TableS6 Differences in microbial community composition at the Genus level between Type I and Type II AC
Type I												TypeII
		NCL	ZT	ZJY	LXH	ZXB	HGT	YS	LX	HYL	WJG	LLH	WCL	LH	SJ	WY	FN	WHP	SYQ	ZF	ZMJ	SSZ	XSY	ZYING	LCH	ZYP	YM	LQF	CDZ	BFF	CDY	YSF	MRH
g__Acinetobacter		3098	30	0	277	103	73	0	47	13	653	860	251	0	1136	3916	4913	13	11	7991	840	0	893	10	0	0	4507	6	2	8789	437	2	80	0.200892
g__Aggregatibacter		0	0	0	783	0	1511	0	739	0	771	5	0	0	14304	0	0	0	37	3	0	124	0	0	0	1071	0	24	595	0	429	27	0	0.703428
g__Akkermansia		2	0	0	0	0	0	0	0	34	3	4	4	11	0	0	0	0	0	0	0	0	6	0	0	0	19	17	9	8	13	0	0	0.936647
g__Allisonella		11	0	0	0	230	0	0	0	14708	0	2258	308	0	0	0	0	42	41	0	0	0	0	0	0	142	0	12	0	0	221	38	0	0.177591
g__Bulleidia		0	0	0	0	0	189	0	7	5	0	0	105	0	4	4369	0	0	43	3	0	0	0	2	5488	382	0	198	156	0	0	508	208	0.285466
g__Cutibacterium		26	0	280	56	117	0	21	0	0	44	0	9	73	0	86	162	44	0	0	207	0	0	0	0	18	0	0	0	0	95	0	6	0.392345
g__Eubacterium_B		0	0	0	0	0	275	0	37	0	0	0	158	0	506	0	0	0	372	0	0	0	0	0	0	0	0	600	0	0	0	0	170	0.398236
g__Fusobacterium_C		0	0	9	3385	0	1214	5	124	8325	0	0	307	0	3271	3879	2729	1081	5624	0	0	542	862	9	4193	580	2978	5768	760	0	6171	61	6944	0.419225
g__Gemella		1629	1449	19550	1488	1492	2227	0	2558	6	7	1001	4604	27	10429	944	6	6	571	12	7	1695	2205	6	0	2336	10	132	7275	0	2770	668	695	0.345645
g__Granulicatella		0	640	0	0	251	396	4	376	0	358	7	0	0	0	0	6	0	1587	3	0	1038	0	5	0	0	0	54	340	3	1018	151	14	0.943983
g__Haemophilus_A		0	0	0	734	11	0	469	569	0	0	0	0	0	0	28	0	0	386	0	0	0	0	0	3717	0	0	0	209	0	0	0	0	0.942262
g__Haemophilus_D		4833	4413	21	6433	264	657	428	717	10	571	19	1745	17	2300	6698	0	1704	1476	0	10955	440	2914	7	0	587	12	163	3464	0	6386	594	297	0.97965
g__Johnsonella		0	0	2308	221	0	23	0	28	0	0	0	0	0	0	0	0	0	0	0	2	0	632	0	0	0	2	0	0	0	271	0	60	0.185478
g__Lachnoanaerobaculum		1192	0	0	0	0	61	0	24	0	0	0	0	0	0	0	2	0	364	0	0	0	0	0	0	0	0	900	97	0	0	0	115	0.555774
g__Lancefieldella		0	0	0	0	0	248	0	9	9	0	0	0	0	0	0	0	918	0	0	2630	0	0	0	0	0	0	1005	5	0	676	0	423	0.251154
g__Leptotrichia_A		0	0	0	140	0	0	0	77	0	0	0	176	0	0	0	0	0	29	0	6	0	0	2420	0	0	0	530	0	0	0	0	136	0.447335
g__Methylobacterium		0	0	7939	166	0	0	176	23	0	0	0	205	4258	0	0	3441	981	102	0	0	0	0	0	0	0	273	2	22	0	338	0	0	0.540601
g__Mogibacterium		0	0	4	236	0	156	0	66	0	0	0	134	2330	115	492	0	0	62	890	1238	79	2	0	0	75	0	271	0	0	0	307	155	0.201276
g__Neisseria		8	217	0	9816	1517	881	194	249	7	1613	25	242	27	154	4	10	0	226	4462	11	2636	384	11	3351	1839	0	0	1018	4	2501	243	64	0.381873
g__Oribacterium		0	582	0	615	0	77	0	11	9	0	0	0	1432	0	0	0	0	145	0	0	39	992	0	1365	0	0	1346	89	0	107	0	135	0.456135
g__Parvimonas		865	456	0	2783	0	1148	0	83	4046	0	455	189	0	0	0	0	0	451	0	2460	1405	318	0	0	0	0	19	672	0	1093	332	713	0.115346
g__Pauljensenia		24	1615	0	0	0	2177	0	502	0	2305	0	0	8	0	0	0	0	150	0	13	821	0	0	0	499	0	117	0	0	611	1349	0	0.0392494
g__Peptostreptococcus		11	10	11	1699	190	387	4	189	5335	0	3761	3163	0	2	0	0	2880	1734	0	1183	127	0	0	6584	2771	0	625	268	3	1118	560	7795	0.383083
g__Porphyromonas_A		1758	1242	0	1932	255	148	0	114	0	0	15	4	0	780	0	0	197	499	0	0	48	0	1284	8	102	0	122	1006	0	193	169	2096	0.303402
g__Prevotella		0	0	0	1079	70	93	0	64	13	644	5	1102	0	1270	0	0	0	981	705	1853	87	0	0	0	928	1152	1750	651	0	289	8512	773	0.227227
g__Pseudomonas_E		1307	3743	2451	130	1299	289	1261	14	11783	1547	10019	702	1468	1052	4368	3366	1458	139	12184	4492	71	1445	16725	6597	19	11077	15	124	27768	1716	38	0	0.318279
g__Ralstonia		4	4	0	0	0	54	0	0	3	733	2307	0	3175	0	1025	0	6	0	0	0	0	758	0	0	0	0	3	149	10271	0	0	0	0.326486
g__Rothia		4	1032	13	1843	1130	5259	0	780	6	1885	0	2525	6	8	14	0	0	2339	9068	2971	2936	0	12997	16	0	0	161	565	0	5913	1936	12	0.547191
g__Staphylococcus		3569	11	0	0	0	0	0	3	3952	0	12	0	0	0	0	3756	10	8	2803	2715	151	0	0	0	0	0	1	0	0	0	0	0	0.507262
g__Streptococcus		19040	23733	3637	7412	42153	27536	18405	35550	65	42120	3943	29826	16773	10032	19469	11993	14004	15202	5374	10517	27697	18595	26349	3766	25650	3015	2386	22818	76	11196	17714	3234	0.0626173
g__Veillonella_A		13	316	0	1890	5	1815	3	79	5253	0	19	1034	1241	0	4906	0	6935	2177	11	0	69	0	0	2728	350	0	5132	8	0	358	650	1108	0.704809
g__unclassified_Bacteria		0	5	4	5	0	0	0	0	7	0	0	0	0	5	6	0	5	0	0	6	0	4	9	3	0	5	0	0	0	0	0	0	0.893607
g__unclassified_Lactobacillales		2	80	1	0	18	75	0	116	0	0	1	7	1	0	0	1	0	155	0	5	147	0	2	0	0	0	0	0	0	0	0	0	0.389173

## Sheet: Table S7
TableS7 Differences in microbial community composition at the phylum level between Eckardt Score ≤ 6 and Eckardt Score ＞ 6
	Eckardt Score ≤ 6																			Eckardt Score ＞6													Pvalue
	LLH	NCL	ZT	WCL	LXH	ZXB	HGT	SJ	FN	WHP	YS	SYQ	ZF	ZMJ	LCH	ZYP	LX	LQF	CDY	ZJY	LH	WY	SSZ	XSY	ZYING	YM	HYL	CDZ	BFF	YSF	MRH	WJG
p__Actinobacteriota	0	54	2647	2534	1899	1247	7684	8	162	962	21	2489	9068	5821	16	517	1291	1283	7295	293	87	100	3757	0	12997	0	15	570	0	3285	441	4234	0.742386
p__Bacteroidota	20	1758	1242	1106	3145	325	447	2050	0	197	0	1605	2439	1853	8	1030	210	1872	482	0	0	0	258	0	1284	1152	13	2070	0	8681	2869	644	0.667431
p__Firmicutes_A	4216	2068	1048	3486	5554	190	1852	117	2	2880	4	2756	890	4883	7949	2846	401	3161	2589	2323	3762	492	1650	1944	0	2	9390	1126	3	1199	8973	0	0.921589
p__Firmicutes_C	2277	24	316	1342	1890	235	1815	0	0	6977	3	2218	11	0	2728	492	79	5144	579	0	1241	4906	69	0	0	0	19961	8	0	688	1108	0	0.573481
p__Firmicutes_D	4964	24240	25913	34542	8900	43914	30423	20461	15762	14020	18384	17566	8195	13244	9254	28368	38610	2771	14969	23188	16793	24782	30700	20791	26364	3025	4028	30569	79	19041	4151	42485	0.857603
p__Fusobacteriota	0	0	0	483	3558	0	1229	3271	2729	1081	5	5782	0	6	4193	641	201	6341	6171	9	0	3879	542	862	2429	2978	8325	781	0	61	7326	0	0.81738
p__Proteobacteria	13235	9250	8407	3145	18339	3194	3465	18946	11730	4162	2528	2377	24640	16298	13665	3516	2358	213	11807	10411	8945	16039	3271	6394	16753	15869	11816	5583	46832	904	441	5888	0.470295
p__unclassified_Bacteria	0	0	5	0	5	0	0	5	0	5	0	0	0	6	3	0	0	0	0	4	0	6	0	4	9	5	7	0	0	0	0	0	0.250736
p__Verrucomicrobiota	4	2	0	4	0	0	0	0	0	0	0	0	0	0	0	0	0	17	13	0	11	0	0	6	0	19	34	9	8	0	0	3	0.0780556

## Sheet: TableS8  
TableS8 Differences in microbial community composition at the Genus level between Eckardt Score ≤ 6 and Eckardt Score ＞ 6
	Eckardt Score ≤ 6																			Eckardt Score ＞ 6
	LLH	NCL	ZT	WCL	LXH	ZXB	HGT	SJ	FN	WHP	YS	SYQ	ZF	ZMJ	LCH	ZYP	LQF	CDY	LX	YM	HYL	CDZ	BFF	YSF	MRH	WJG	SSZ	XSY	ZYING	ZJY	LH	WY	Pvalue
g__Acinetobacter	860	3098	30	251	277	103	73	1136	4913	13	0	11	7991	840	0	0	6	437	47	4507	13	2	8789	2	80	653	0	893	10	0	0	3916	0.828947
g__Aggregatibacter	5	0	0	0	783	0	1511	14304	0	0	0	37	3	0	0	1071	24	429	739	0	0	595	0	27	0	771	124	0	0	0	0	0	0.366651
g__Akkermansia	4	2	0	4	0	0	0	0	0	0	0	0	0	0	0	0	17	13	0	19	34	9	8	0	0	3	0	6	0	0	11	0	0.0557468
g__Allisonella	2258	11	0	308	0	230	0	0	0	42	0	41	0	0	0	142	12	221	0	0	14708	0	0	38	0	0	0	0	0	0	0	0	0.287493
g__Bulleidia	0	0	0	105	0	0	189	4	0	0	0	43	3	0	5488	382	198	0	7	0	5	156	0	508	208	0	0	0	2	0	0	4369	0.47454
g__Cutibacterium	0	26	0	9	56	117	0	0	162	44	21	0	0	207	0	18	0	95	0	0	0	0	0	0	6	44	0	0	0	280	73	86	0.812249
g__Fusobacterium_C	0	0	0	307	3385	0	1214	3271	2729	1081	5	5624	0	0	4193	580	5768	6171	124	2978	8325	760	0	61	6944	0	542	862	9	9	0	3879	0.910079
g__Gemella	1001	1629	1449	4604	1488	1492	2227	10429	6	6	0	571	12	7	0	2336	132	2770	2558	10	6	7275	0	668	695	7	1695	2205	6	19550	27	944	0.522771
g__Granulicatella	7	0	640	0	0	251	396	0	6	0	4	1587	3	0	0	0	54	1018	376	0	0	340	3	151	14	358	1038	0	5	0	0	0	0.631489
g__Haemophilus_A	0	0	0	0	734	11	0	0	0	0	469	386	0	0	3717	0	0	0	569	0	0	209	0	0	0	0	0	0	0	0	0	28	0.250573
g__Haemophilus_D	19	4833	4413	1745	6433	264	657	2300	0	1704	428	1476	0	10955	0	587	163	6386	717	12	10	3464	0	594	297	571	440	2914	7	21	17	6698	0.095955
g__HOT_345	557	0	252	0	0	0	0	0	0	0	0	0	0	0	0	72	48	0	32	0	0	119	0	11	0	0	0	0	0	0	0	0	0.33226
g__Johnsonella	0	0	0	0	221	0	23	0	0	0	0	0	0	2	0	0	0	271	28	2	0	0	0	0	60	0	0	632	0	2308	0	0	0.16222
g__Lachnoanaerobaculum	0	1192	0	0	0	0	61	0	2	0	0	364	0	0	0	0	900	0	24	0	0	97	0	0	115	0	0	0	0	0	0	0	0.245204
g__Lancefieldella	0	0	0	0	0	0	248	0	0	918	0	0	0	2630	0	0	1005	676	9	0	9	5	0	0	423	0	0	0	0	0	0	0	0.199218
g__Leptotrichia_A	0	0	0	176	140	0	0	0	0	0	0	29	0	6	0	0	530	0	77	0	0	0	0	0	136	0	0	0	2420	0	0	0	0.324854
g__Methylobacterium	0	0	0	205	166	0	0	0	3441	981	176	102	0	0	0	0	2	338	23	273	0	22	0	0	0	0	0	0	0	7939	4258	0	0.226716
g__Mogibacterium	0	0	0	134	236	0	156	115	0	0	0	62	890	1238	0	75	271	0	66	0	0	0	0	307	155	0	79	2	0	4	2330	492	0.702416
g__Neisseria	25	8	217	242	9816	1517	881	154	10	0	194	226	4462	11	3351	1839	0	2501	249	0	7	1018	4	243	64	1613	2636	384	11	0	27	4	0.252241
g__Oribacterium	0	0	582	0	615	0	77	0	0	0	0	145	0	0	1365	0	1346	107	11	0	9	89	0	0	135	0	39	992	0	0	1432	0	0.994843
g__Parvimonas	455	865	456	189	2783	0	1148	0	0	0	0	451	0	2460	0	0	19	1093	83	0	4046	672	0	332	713	0	1405	318	0	0	0	0	0.787331
g__Pauljensenia	0	24	1615	0	0	0	2177	0	0	0	0	150	0	13	0	499	117	611	502	0	0	0	0	1349	0	2305	821	0	0	0	8	0	0.766235
g__Peptostreptococcus	3761	11	10	3163	1699	190	387	2	0	2880	4	1734	0	1183	6584	2771	625	1118	189	0	5335	268	3	560	7795	0	127	0	0	11	0	0	0.789376
g__Porphyromonas_A	15	1758	1242	4	1932	255	148	780	0	197	0	499	0	0	8	102	122	193	114	0	0	1006	0	169	2096	0	48	0	1284	0	0	0	0.98573
g__Prevotella	29771	53	13	1227	1079	70	93	1270	0	37	0	981	705	1853	0	928	1762	289	64	1152	13	651	0	8512	1040	644	87	0	0	0	0	0	0.589419
g__Pseudomonas_E	10019	1307	3743	702	130	1299	289	1052	3366	1458	1261	139	12184	4492	6597	19	15	1716	14	11077	11783	124	27768	38	0	1547	71	1445	16725	2451	1468	4368	0.122039
g__Ralstonia	2307	4	4	0	0	0	54	0	0	6	0	0	0	0	0	0	3	0	0	0	3	149	10271	0	0	733	0	758	0	0	3175	1025	0.113657
g__Rothia	0	4	1032	2525	1843	1130	5259	8	0	0	0	2339	9068	2971	16	0	161	5913	780	0	6	565	0	1936	12	1885	2936	0	12997	13	6	14	0.969432
g__Staphylococcus	12	3569	11	0	0	0	0	0	3756	10	0	8	2803	2715	0	0	1	0	3	0	3952	0	0	0	0	0	151	0	0	0	0	0	0.481959
g__Streptococcus	3943	19040	23733	29826	7412	42153	27536	10028	11993	14004	18380	15202	5374	10517	3766	25650	2386	11181	35550	3015	65	22798	76	17714	3234	42120	27669	18586	26349	3637	16765	19469	0.732035
g__unclassified_Bacteria	0	0	5	0	5	0	0	5	0	5	0	0	0	6	3	0	0	0	0	5	7	0	0	0	0	0	0	4	9	4	0	6	0.385358
g__unclassified_Lactobacillales	1	2	80	7	0	18	75	0	1	0	0	155	0	5	0	0	0	0	116	0	0	0	0	0	0	0	147	0	2	1	1	0	0.488186
g__Veillonella_A	19	13	316	1034	1890	5	1815	0	0	6935	3	2177	11	0	2728	350	5132	358	79	0	5253	8	0	650	1108	0	69	0	0	0	1241	4906	0.445278

## Sheet: TableS9
TableS9 lefse_results Eckardt Score ≤ 6 and Eckardt Score ＞ 6
	Pvalues	FDR	Eckardt_Score_Le_6	Eckardt_Score_Gt_6	LDAscore
g__Peptostreptococcus	0.060736	0.62144	35242	33384	2.97
g__Staphylococcus	0.063863	0.62144	18368	5962.3	3.79
g__Akkermansia	0.081363	0.62144	69.698	189.62	-1.79
g__Allisonella	0.089438	0.62144	3398.2	21199	-3.95
g__Ralstonia	0.096734	0.62144	2295.9	29618	-4.14
g__Porphyromonas_A	0.12913	0.62144	9779.3	10407	-2.5
g__unclassified_Lactobacillales	0.15028	0.62144	606.82	289.01	2.2
g__Neisseria	0.16098	0.62144	32187	11157	4.02
g__Aggregatibacter	0.18965	0.62144	22489	2545.6	4
g__Haemophilus_D	0.20503	0.62144	55919	28399	4.14
g__Prevotella	0.22165	0.62144	43840	28690	3.88
g__Haemophilus_A	0.22598	0.62144	8541.6	440.84	3.61
g__Veillonella_A	0.28599	0.68856	39140	23141	3.9
g__unclassified_Bacteria	0.3102	0.68856	38.927	66.247	-1.17
g__Lachnoanaerobaculum	0.31298	0.68856	4606.7	533.92	3.31
g__HOT_345	0.41107	0.78838	1127.2	251.56	2.64
g__Lancefieldella	0.42473	0.78838	8522.1	1307	3.56
g__Leptotrichia_A	0.44921	0.78838	1854.4	3524.1	-2.92
g__Pauljensenia	0.47658	0.78838	7208.1	7987.1	-2.59
g__Pseudomonas_E	0.47781	0.78838	63678	142860	-4.6
g__Cutibacterium	0.51899	0.79033	1048.1	990.16	1.48
g__Acinetobacter	0.58995	0.79033	27224	38965	-3.77
g__Streptococcus	0.60447	0.79033	430670	378520	4.42
g__Methylobacterium	0.61982	0.79033	9132.5	28431	-3.98
g__Granulicatella	0.64488	0.79033	5825.4	3551.3	3.06
g__Johnsonella	0.64581	0.79033	657.17	6709.9	-3.48
g__Gemella	0.65892	0.79033	39478	69467	-4.18
g__Rothia	0.67058	0.79033	40324	30642	3.69
g__Parvimonas	0.85537	0.97335	12378	13515	-2.76
g__Oribacterium	0.96625	0.98452	7271.4	6782.5	2.39
g__Bulleidia	0.9834	0.98452	9089.5	8786.4	2.18
g__Mogibacterium	0.98384	0.98452	4339.1	7898.7	-3.25
g__Fusobacterium_C	0.98452	0.98452	53651	53785	-1.83

## Sheet: TableS10
TableS10 lefse_results
Taxa	Abundace	Group	LDA_score	Pvalue
Bacteria.Firmicutes_D.Bacilli.Bacillales_B	3.95769	NC	3.69389	0.0207243
Bacteria.Proteobacteria.Gammaproteobacteria.Burkholderiales.Chromobacteriaceae	0.0520634544331			-
Bacteria.Fusobacteriota.Fusobacteriia.Fusobacteriales.Fusobacteriaceae.Fusobacterium_C.Fusobacterium_C_gastrosuis	0.789257			-
Bacteria.Actinobacteriota.Actinomycetia.Mycobacteriales	4.16504			-
Bacteria.Bacteroidota.Bacteroidia.Bacteroidales.Rikenellaceae.Tidjanibacter	0.50878			-
Bacteria.Firmicutes_D.Bacilli.Bacillales_B.Bacillaceae_G.Bacillus_A	1.47754	NC	3.09023	0.0322287762077
Bacteria.Actinobacteriota.Acidimicrobiia.Acidimicrobiales.Microtrichaceae.IMCC26207	2.16357			-
Bacteria.Desulfobacterota_I.Desulfovibrionia.Desulfovibrionales.Desulfomicrobiaceae.Desulfomicrobium.Desulfomicrobium_orale	2.06534			-
Bacteria.Actinobacteriota.Actinomycetia.Sporichthyales.Sporichthyaceae.Longivirga	0			-
Bacteria.Proteobacteria.Gammaproteobacteria.Burkholderiales.Chromobacteriaceae.Vogesella	0.0520634544331			-
Bacteria.Firmicutes_A.Clostridia.Christensenellales.CAG_138.PeH17	0.0273381385789			-
Bacteria.Firmicutes_A.Clostridia.Lachnospirales.Lachnospiraceae.Stomatobaculum.Stomatobaculum_longum	3.28074			-
Bacteria.Actinobacteriota.Actinomycetia.Actinomycetales.Bifidobacteriaceae.Alloscardovia	1.79496			-
Bacteria.Firmicutes_C.Negativicutes.Veillonellales.Dialisteraceae.Allisonella	3.89066	AC	3.50818	0.00539608251197
Bacteria.Desulfobacterota_I.Syntrophobacteria	2.22131			-
Bacteria.Actinobacteriota.Coriobacteriia.Coriobacteriales.Atopobiaceae.Olegusella.Olegusella_massiliensis	3.21234			-
Bacteria.Firmicutes_A.Clostridia.Peptostreptococcales.Peptostreptococcaceae.Paraclostridium.Paraclostridium_sordellii	3.06592			-
Bacteria.Firmicutes_C.Negativicutes.Acidaminococcales.Acidaminococcaceae.Phascolarctobacterium_A.Phascolarctobacterium_A_faecium	0			-
Bacteria.Spirochaetota	2.67303			-
Bacteria.Actinobacteriota.Actinomycetia.Mycobacteriales.Mycobacteriaceae.Corynebacterium.Corynebacterium_propinquum	3.3096			-
Bacteria.Bacteroidota.Bacteroidia.Flavobacteriales.Flavobacteriaceae.Flavobacterium.Flavobacterium_lacicola	2.62827			-
Bacteria.Firmicutes_C.Negativicutes.Veillonellales.Veillonellaceae	4.43568			-
Bacteria.Firmicutes_A.Clostridia.Peptostreptococcales.Peptostreptococcaceae.Peptostreptococcus.Peptostreptococcus_stomatis	4.36749			-
Bacteria.Firmicutes_A.Clostridia.Eubacteriales.Alkalibacteraceae	0.437983			-
Bacteria.Gemmatimonadota.Gemmatimonadetes.Longimicrobiales.RSA9.RSA9	0.234641			-
Bacteria.Patescibacteria.Saccharimonadia.Saccharimonadales.Nanosyncoccaceae	3.18714			-
Bacteria.Bacteroidota.Bacteroidia.Bacteroidales.Bacteroidaceae.Prevotella.Prevotella_seregens	0.703545			-
Bacteria.Actinobacteriota.Actinomycetia.Mycobacteriales.Geodermatophilaceae	2.83138			-
Bacteria.Firmicutes_A.Clostridia.Lachnospirales.Lachnospiraceae.Agathobacter	0.904057			-
Bacteria.Proteobacteria.Gammaproteobacteria.Burkholderiales.Chromobacteriaceae.Vogesella.Vogesella_indigofera	0.0520634544331			-
Bacteria.Patescibacteria.Paceibacteria.UBA9983_A	1.78195			-
Bacteria.Bacteroidota.Bacteroidia.Bacteroidales.Marinifilaceae.Odoribacter	2.35412			-
Bacteria.Proteobacteria.Gammaproteobacteria.Pseudomonadales.Pseudomonadaceae.Pseudomonas_A.Pseudomonas_A_nitrititolerans	2.54222			-
Bacteria.Verrucomicrobiota.Verrucomicrobiae.Verrucomicrobiales.Akkermansiaceae.Akkermansia	2.97707			-
Bacteria.Firmicutes_D.Bacilli.Mycoplasmatales.Metamycoplasmataceae.Metamycoplasma.Metamycoplasma_orale	0.584225			-
Bacteria.Bacteroidota.Bacteroidia.Flavobacteriales.Flavobacteriaceae.Capnocytophaga	3.62823			-
Bacteria.Proteobacteria.Gammaproteobacteria.Burkholderiales.Burkholderiaceae_A.Schlegelella	2.11453			-
Bacteria.Firmicutes_D.Bacilli.Bacillales_H	2.57938			-
Bacteria.Actinobacteriota.Acidimicrobiia.Acidimicrobiales.Ilumatobacteraceae.Ilumatobacter_A	0.0532261457459			-
Bacteria.Bacteroidota.Bacteroidia.Bacteroidales.Muribaculaceae.UBA3263.UBA3263_sp001689615	0.8521			-
Bacteria.Actinobacteriota.Actinomycetia.Streptosporangiales.Streptosporangiaceae.Thermobifida.Thermobifida_cellulosilytica	0.901083			-
Bacteria.Planctomycetota	0.281001			-
Bacteria.Firmicutes_D.Bacilli.Bacillales_B.Bacillaceae_H.Bacillus_P	0.354256			-
Bacteria.Firmicutes_A.Clostridia.Lachnospirales.CAG_274.CAG_274	2.86751			-
Bacteria.Patescibacteria.Saccharimonadia.Saccharimonadales.UBA10027.SDRW01	0.730353			-
Bacteria.Bacteroidota.Bacteroidia.Bacteroidales.Bacteroidaceae.Prevotella.Prevotella_multiformis	2.02241			-
Bacteria.Firmicutes_A.Clostridia.Christensenellales.CAG_552	0.0674184409133			-
Bacteria.Deinococcota.Deinococci.Deinococcales.Thermaceae.Thermus_A.Thermus_A_amyloliquefaciens	0.586143			-
Bacteria.Firmicutes_D.Bacilli.Erysipelotrichales.Erysipelotrichaceae.Merdibacter	0.0790172			-
Bacteria.Desulfobacterota_B.Binatia	2.46922			-
Bacteria.Firmicutes_C.Negativicutes.Veillonellales.Megasphaeraceae.Anaeroglobus.Anaeroglobus_micronuciformis	3.40462			-
Bacteria.Acidobacteriota.Vicinamibacteria.Vicinamibacterales.UBA2999.WHSN01	0.0614854646116			-
Bacteria.Fusobacteriota.Fusobacteriia.Fusobacteriales.Leptotrichiaceae.Leptotrichia_A.Leptotrichia_A_993758_hongkongensis	2.2341			-
Bacteria.Proteobacteria.Gammaproteobacteria.Burkholderiales	4.78907			-
Bacteria.Actinobacteriota.Actinomycetia.Actinomycetales.Micrococcaceae.Micrococcus.Micrococcus_luteus	3.37907			-
Bacteria.Actinobacteriota.UBA4738.UBA4738	0.99471			-
Bacteria.Bacteroidota.Bacteroidia.Bacteroidales.Bacteroidaceae.Prevotella.Prevotella_vespertina	2.63793			-
Bacteria.Bacteroidota.Bacteroidia.Bacteroidales.Tannerellaceae.Parabacteroides_B	1.91811			-
Bacteria.Thermotogota	0.558251			-
Bacteria.Deinococcota.Deinococci.Deinococcales.Thermaceae.Thermus_A.Thermus_A_scotoductus	3.44239			-
Bacteria.Actinobacteriota.Actinomycetia.Propionibacteriales.Propionibacteriaceae.Propionibacterium	1.17175			-
Bacteria.Firmicutes_A.Clostridia.Eubacteriales.Alkalibacteraceae.Alkalibacter	0.437983			-
Bacteria.Firmicutes_D.Bacilli.RF39.UBA660.CAG_628.CAG_628_sp003524085	1.84365			-
Bacteria.Firmicutes_A.Clostridia.Lachnospirales.Lachnospiraceae.Oribacterium.Oribacterium_sp000160135	2.84732			-
Bacteria.Proteobacteria.Gammaproteobacteria.Burkholderiales.Burkholderiaceae_A.Variovorax	1.69876			-
Bacteria.Actinobacteriota.Actinomycetia.Mycobacteriales.Mycobacteriaceae.Corynebacterium	3.65186			-
Bacteria.Firmicutes_D.Bacilli.Lactobacillales.Streptococcaceae.Streptococcus.Streptococcus_mitis_AR	1.0065			-
Bacteria.Firmicutes_A.Clostridia.Oscillospirales.Oscillospiraceae.Lawsonibacter.Lawsonibacter_sp000177015	3.20387			-
Bacteria.Cyanobacteria.Cyanobacteriia.Cyanobacteriales.Xenococcaceae.Pleurocapsa.Pleurocapsa_sp000332195	1.20255			-
Bacteria.Eisenbacteria.RBG_16_71_46.RBG_16_71_46.RBG_16_71_46	0			-
Bacteria.Proteobacteria.Gammaproteobacteria.Burkholderiales.Burkholderiaceae_A.Ottowia	3.05727			-
Bacteria.Desulfobacterota_I.Desulfovibrionia.Desulfovibrionales.Desulfomicrobiaceae	2.06534			-
Bacteria.Firmicutes_C.Negativicutes.Veillonellales.Dialisteraceae	3.90776	AC	3.55014	0.0388351919984
Bacteria.Proteobacteria.Gammaproteobacteria.Burkholderiales.Rhodocyclaceae.Thauera_A	3.83431			-
Bacteria.Actinobacteriota.Actinomycetia.Actinomycetales.Actinomycetaceae.Actinomyces.Actinomyces_bowdenii	0.0404804562992			-
Bacteria.Firmicutes_C.Negativicutes.Veillonellales.Veillonellaceae.Veillonella_A.Veillonella_A_rodentium	1.5192			-
Bacteria.Bacteroidota.Bacteroidia.Chitinophagales.Chitinophagaceae.Terrimonas	2.2455			-
Bacteria.Proteobacteria.Gammaproteobacteria.Burkholderiales.SG8_41.UBA5216.UBA5216_sp902825845	0.0655015			-
Bacteria.Proteobacteria.Gammaproteobacteria.Pseudomonadales.Pseudomonadaceae.Pseudomonas_E	4.78037			-
Bacteria.Actinobacteriota.Actinomycetia.Actinomycetales.Micrococcaceae.Rothia.Rothia_dentocariosa	3.08391			-
Bacteria.Proteobacteria.Alphaproteobacteria.Sphingomonadales.Sphingomonadaceae.Croceibacterium.Croceibacterium_ferulae	1.91383			-
Bacteria.Proteobacteria.Gammaproteobacteria.Pseudomonadales.Moraxellaceae.Acinetobacter.Acinetobacter_sp000632455	1.19706			-
Bacteria.Firmicutes_A.Clostridia.Lachnospirales.Lachnospiraceae.Acetatifactor	2.55466			-
Bacteria.Proteobacteria.Gammaproteobacteria.Burkholderiales.Casimicrobiaceae.VBCG01.VBCG01_sp005881895	0.166569			-
Bacteria.Proteobacteria.Gammaproteobacteria.GCA_2729495.GCA_2729495.GCA_002729875	0			-
Bacteria.Bacteroidota.Bacteroidia.Cytophagales.Cyclobacteriaceae	2.76995			-
Bacteria.Firmicutes_D.Bacilli.Erysipelotrichales.Coprobacillaceae.Eggerthia.Eggerthia_catenaformis	1.78858			-
Bacteria.Firmicutes_A.Clostridia.Lachnospirales.Lachnospiraceae.CAG_56.CAG_56_sp004793585	0.114959			-
Bacteria.Bacteroidota.Bacteroidia.Bacteroidales.Rikenellaceae.Alistipes_A	1.6597			-
Bacteria.Proteobacteria.Gammaproteobacteria.Burkholderiales.Burkholderiaceae_A.Massilia	0.448272			-
Bacteria.Bacteroidota.Bacteroidia.Bacteroidales.Bacteroidaceae.Alloprevotella.Alloprevotella_sp003859795	0.362377			-
Bacteria.Proteobacteria.Gammaproteobacteria.Pseudomonadales.Moraxellaceae.Acinetobacter	4.63228			-
Bacteria.Proteobacteria.Gammaproteobacteria.Burkholderiales.Usitatibacteraceae.Usitatibacter	0.842263			-
Bacteria.Firmicutes_A.Clostridia.Oscillospirales	3.93832			-
Bacteria.Bacteroidota.Bacteroidia.Bacteroidales.Porphyromonadaceae.Porphyromonas_A	4.13993			-
Bacteria.Actinobacteriota.Acidimicrobiia.Acidimicrobiales.Microtrichaceae	2.16357			-
Bacteria.Firmicutes_D.Bacilli.Lactobacillales.Carnobacteriaceae.Atopostipes.Atopostipes_suicloacalis	3.59079			-
Bacteria.Firmicutes_D.Bacilli.Lactobacillales.Streptococcaceae	5.47164			-
Bacteria.Proteobacteria.Gammaproteobacteria.Burkholderiales.Burkholderiaceae_A.Herbaspirillum.Herbaspirillum_aquaticum	0.165419			-
Bacteria.Firmicutes_A.Clostridia.Oscillospirales.Ruminococcaceae.Faecalibacterium.Faecalibacterium_sp002160895	1.93631			-
Bacteria.Bacteroidota.Bacteroidia.Bacteroidales.Tannerellaceae	2.62418	AC	2.50224	0.0247402664371
Bacteria.Firmicutes_D.Bacilli.Lactobacillales.Enterococcaceae.Enterococcus_H	0.0310010026672			-
Bacteria.Cyanobacteria.Cyanobacteriia.Cyanobacteriales	2.11732	NC	2.59406	0.0181042054621
Bacteria.Bacteroidota.Bacteroidia.Bacteroidales.Muribaculaceae	3.73801			-
Bacteria.Firmicutes_A.Clostridia.UBA1381	0.282369			-
Bacteria.Firmicutes_A.Clostridia.Lachnospirales.CAG_274	2.86751			-
Bacteria.Firmicutes_D.Bacilli.Lactobacillales.Enterococcaceae.Enterococcus_E	0			-
Bacteria.Proteobacteria.Gammaproteobacteria.Burkholderiales.Burkholderiaceae_A.Comamonas_F.Comamonas_F_589250_nitrativorans	3.39407			-
Bacteria.Proteobacteria.Gammaproteobacteria.Burkholderiales.Rhodocyclaceae.Thauera_A.Thauera_A_597130_aminoaromatica	3.00814			-
Bacteria.Bacteroidota.Bacteroidia.Bacteroidales.Bacteroidaceae.Prevotella.Prevotella_denticola	2.20405			-
Bacteria.Patescibacteria.Saccharimonadia.Saccharimonadales.Saccharimonadaceae.SZUA_359	0.584285			-
Bacteria.Firmicutes_A.Clostridia.Oscillospirales.UBA644.UBA644	2.05227			-
Bacteria.Actinobacteriota.Acidimicrobiia	2.80768			-
Bacteria.Campylobacterota.Campylobacteria.Campylobacterales.Helicobacteraceae.Helicobacter_C	0.491303			-
Bacteria.Firmicutes_A.Clostridia.Lachnospirales.Lachnospiraceae.Lachnoanaerobaculum	3.5717			-
Bacteria.Bacteroidota.Bacteroidia.Bacteroidales.Rikenellaceae.Alistipes_A.Alistipes_A_871400_excrementavium	0.815564			-
Bacteria.Proteobacteria.Gammaproteobacteria.GCA_2729495.GCA_2729495	0			-
Bacteria.Verrucomicrobiota	3.00585			-
Bacteria.Proteobacteria.Gammaproteobacteria.Steroidobacterales.Steroidobacteraceae.SCUD01	0.0651818843029			-
Bacteria.Actinobacteriota.Thermoleophilia.Solirubrobacterales.70_9.VAYN01	2.15608			-
Bacteria.Firmicutes_A.Clostridia.Oscillospirales.Oscillospiraceae.Lawsonibacter.Lawsonibacter_asaccharolyticus	0.170801			-
Bacteria.Bacteroidota.Bacteroidia.Bacteroidales	4.8928	AC	4.33122	0.0244394726398
Bacteria.Firmicutes_A.Clostridia.Christensenellales.GCA_900066905	0			-
Bacteria.Firmicutes_D.Bacilli.Staphylococcales.Gemellaceae.Gemella.Gemella_sanguinis	3.94751			-
Bacteria.Cyanobacteria	2.71239			-
Bacteria.Firmicutes_C.Negativicutes.Veillonellales.Veillonellaceae.Veillonella_A.Veillonella_A_atypica	4.10142			-
Bacteria.Proteobacteria.Gammaproteobacteria.Burkholderiales.Burkholderiaceae_A.Schlegelella.Schlegelella_aquatica	2.11453			-
Bacteria.Cyanobacteria.Cyanobacteriia.Cyanobacteriales.Xenococcaceae	1.20255			-
Bacteria.Proteobacteria.Gammaproteobacteria.Enterobacterales_A.Pasteurellaceae.Haemophilus_D	4.60228			-
Bacteria.Proteobacteria.Alphaproteobacteria.Acetobacterales.Acetobacteraceae.Caldovatus	3.42369			-
Bacteria.Thermotogota.Thermotogae.Petrotogales.Petrotogaceae.Defluviitoga	0.558251			-
Bacteria.Proteobacteria.Gammaproteobacteria.Enterobacterales_A.Pasteurellaceae.Haemophilus_A	4.54501			-
Bacteria.Thermosulfidibacterota.Thermosulfidibacteria.Thermosulfidibacterales.Thermosulfidibacteraceae	2.95446			-
Bacteria.Proteobacteria.Alphaproteobacteria.Sphingomonadales.Sphingomonadaceae.Croceibacterium	1.91383			-
Bacteria.Firmicutes_D.Bacilli.Lactobacillales.Streptococcaceae.Streptococcus.Streptococcus_intermedius	1.81551			-
Bacteria.Gemmatimonadota.Gemmatimonadetes.Gemmatimonadales.GWC2_71_9	0.0212241963316			-
Bacteria.Spirochaetota.Spirochaetia.Treponematales.Treponemataceae.Treponema_C.Treponema_C_lecithinolyticum	0.917823			-
Bacteria.Fusobacteriota.Fusobacteriia.Fusobacteriales.Leptotrichiaceae.Leptotrichia_A.Leptotrichia_A_sp001274535	3.73463	AC	3.2116	0.0343488113264
Bacteria.Bacteroidota.Bacteroidia.Bacteroidales.Bacteroidaceae.Prevotella.Prevotella_maculosa	1.73866			-
Bacteria.Desulfobacterota_I.Syntrophobacteria.Syntrophobacterales.Syntrophobacteraceae	2.22131			-
Bacteria.Proteobacteria.Gammaproteobacteria.Enterobacterales_A.Pasteurellaceae.Haemophilus_D.Haemophilus_D_736121_haemolyticus	0.927139			-
Bacteria.Gemmatimonadota.Gemmatimonadetes.Longimicrobiales	0.234641			-
Bacteria.Proteobacteria.Gammaproteobacteria.Burkholderiales.Burkholderiaceae_A.Duganella	2.81009			-
Bacteria.Firmicutes_C.Negativicutes.Selenomonadales.Selenomonadaceae.Mitsuokella.Selenomonas_bovis	0.940127			-
Bacteria.Cyanobacteria.Vampirovibrionia	2.71141			-
Bacteria.Actinobacteriota.Actinomycetia.Actinomycetales.Brevibacteriaceae.Brevibacterium	1.76767			-
Bacteria.Firmicutes_D.Bacilli.Lactobacillales.Lactobacillaceae.Lacticaseibacillus	3.63937	AC	3.52887	0.0308778216401
Bacteria.Firmicutes_D.Bacilli.Lactobacillales.Streptococcaceae.Streptococcus.Streptococcus_peroris	2.57567			-
Bacteria.Firmicutes_A.Clostridia.Oscillospirales.Acutalibacteraceae	3.48131			-
Bacteria.Bacteroidota.Bacteroidia.Bacteroidales.Dysgonomonadaceae.Proteiniphilum	2.96997			-
Bacteria.Actinobacteriota.Actinomycetia.Propionibacteriales.Nocardioidaceae.Nocardioides_A.Nocardioides_A_392796_allogilvus	2.97201			-
Bacteria.Eisenbacteria.RBG_16_71_46.RBG_16_71_46	0			-
Bacteria.Proteobacteria.Alphaproteobacteria.Rhodobacterales.Rhodobacteraceae.Paracoccus	2.48089			-
Bacteria.Actinobacteriota.Actinomycetia.Actinomycetales.Actinomycetaceae.Pauljensenia	4.75342	NC	4.22598	0.0200274451491
Bacteria.Firmicutes_A.Clostridia.Lachnospirales.Lachnospiraceae.Lachnoanaerobaculum.Lachnoanaerobaculum_sp000209465	3.19731			-
Bacteria.Firmicutes_D.Bacilli.RF39.UBA660.CAG_605	2.03764			-
Bacteria.Firmicutes_B.Desulfotomaculia.Desulfotomaculales.Desulfotomaculaceae.Desulfotomaculum	0.730353			-
Bacteria.Bacteroidota.Bacteroidia.Bacteroidales.Bacteroidaceae.Prevotella.Prevotella_nanceiensis	3.32076			-
Bacteria.Proteobacteria.Gammaproteobacteria.Steroidobacterales.Steroidobacteraceae.SCUD01.SCUD01_sp004297335	0.0651818843029			-
Bacteria.Bacteroidota.Rhodothermia.Rhodothermales	2.78446			-
Bacteria.Actinobacteriota.Actinomycetia.Propionibacteriales.Propionibacteriaceae.Arachnia.Arachnia_rubra	1.34862			-
Bacteria.Bacteroidota.Bacteroidia.Flavobacteriales.Flavobacteriaceae.Capnocytophaga.Capnocytophaga_sp000192225	1.6875			-
Bacteria.Firmicutes_A.Clostridia.Christensenellales.CAG_74.Onthenecus	0.197316			-
Bacteria.Firmicutes_D.Bacilli.Mycoplasmatales	1.42713			-
Bacteria.Patescibacteria.Saccharimonadia.Saccharimonadales.UBA1547	0			-
Bacteria.Myxococcota_A.UBA9160	2.10233			-
Bacteria.Firmicutes_A.Clostridia.Lachnospirales.Lachnospiraceae	4.50371			-
Bacteria.Cyanobacteria.Cyanobacteriia.Phormidesmiales.Phormidesmiaceae.Nodosilinea	0.248671			-
Bacteria.Desulfobacterota_I.Desulfovibrionia.Desulfovibrionales.Desulfovibrionaceae.Solidesulfovibrio	0			-
Bacteria.Firmicutes_D.Bacilli.Erysipelotrichales.Erysipelotrichaceae.Ileibacterium.Ileibacterium_valens	2.67577			-
Bacteria.Firmicutes_A.Clostridia.Lachnospirales.Lachnospiraceae.Eubacterium_J.Eubacterium_J_plexicaudatum	0.165419			-
Bacteria.Firmicutes_D.Bacilli.RF39.UBA660.Scybalousia.Scybalousia_sp900543675	1.6218			-
Bacteria.Actinobacteriota	5.2213	NC	4.51397	0.0177661375597
Bacteria.Patescibacteria.Saccharimonadia.Saccharimonadales.Nanosynbacteraceae.Nanosynbacter.Nanosynbacter_lyticus	0.069875			-
Bacteria.Proteobacteria.Gammaproteobacteria.Methylococcales	0			-
Bacteria.Actinobacteriota.Actinomycetia.Mycobacteriales.Geodermatophilaceae.Blastococcus.Blastococcus_jejuensis	0			-
Bacteria.Myxococcota_A	2.10233			-
Bacteria.Firmicutes_A.Clostridia.Lachnospirales.Vallitaleaceae_A	0.730353			-
Bacteria.Spirochaetota.Spirochaetia.Treponematales.Treponemataceae.Treponema_B.Treponema_B_986141_putidum	1.55952			-
Bacteria.Bacteroidota.Bacteroidia.Bacteroidales.Bacteroidaceae.Bacteroides_H.Bacteroides_H_stercorirosoris	0.448272			-
Bacteria.Campylobacterota.Campylobacteria.Campylobacterales.Campylobacteraceae.Campylobacter_B	1.69801			-
Bacteria.Firmicutes_A.Clostridia.Oscillospirales.CAG_272	2.70149			-
Bacteria.Firmicutes_A.Clostridia.Lachnospirales.Lachnospiraceae.Stomatobaculum	3.28074			-
Bacteria.Firmicutes_D.Bacilli.Erysipelotrichales.Erysipelotrichaceae.Merdibacter.Merdibacter_massiliensis	0.0790172			-
Bacteria.Proteobacteria.Gammaproteobacteria.Burkholderiales.Neisseriaceae.Kingella_A.Kingella_A_denitrificans	2.10218			-
Bacteria.Actinobacteriota.Coriobacteriia.Coriobacteriales.Atopobiaceae.Lancefieldella.Lancefieldella_parvula	2.91617			-
Bacteria.Proteobacteria.Gammaproteobacteria.Xanthomonadales.Xanthomonadaceae.Arenimonas	0			-
Bacteria.Firmicutes_D.Bacilli.RF39	3.24607			-
Bacteria.Firmicutes_A.Clostridia.Clostridiales.Clostridiaceae.Clostridium_T.Clostridium_T_disporicum	2.45403			-
Bacteria.Actinobacteriota.UBA4738.UBA4738.HRBIN12.AC_51.AC_51_sp005883885	0.99471			-
Bacteria.Firmicutes_A.Clostridia.Peptostreptococcales.Peptostreptococcaceae.Paraclostridium	3.06798			-
Bacteria.Campylobacterota.Campylobacteria.Campylobacterales.Campylobacteraceae.Campylobacter_B.Campylobacter_B_gracilis	0			-
Bacteria.Bacteroidota.Bacteroidia.Bacteroidales.Bacteroidaceae.Prevotella.Prevotella_baroniae	2.27355			-
Bacteria.Cyanobacteria.Vampirovibrionia.Gastranaerophilales.Gastranaerophilaceae.UBA2813	2.34767			-
Bacteria.Campylobacterota.Campylobacteria.Campylobacterales.Campylobacteraceae	3.285			-
Bacteria.Desulfobacterota_I.Desulfovibrionia	2.15806			-
Bacteria.Proteobacteria.Gammaproteobacteria.Burkholderiales.Burkholderiaceae_A.Turicimonas	0.229317			-
Bacteria.Spirochaetota.Leptospirae.Turneriellales.Turneriellaceae.Turneriella.Turneriella_parva	1.90056			-
Bacteria.Actinobacteriota.Thermoleophilia.Gaiellales.Gaiellaceae.GMQP_bins7.GMQP_bins7_sp004366385	2.51472			-
Bacteria.Campylobacterota.Campylobacteria	3.46141			-
Bacteria.Bacteroidota.Bacteroidia.Bacteroidales.Bacteroidaceae.Prevotella.Prevotella_intermedia	3.03715			-
Bacteria.Firmicutes_D.Bacilli	5.57958			-
Bacteria.Firmicutes_D.Bacilli.Lactobacillales.Carnobacteriaceae	3.59114			-
Bacteria.Deinococcota.Deinococci.Deinococcales.Thermaceae.Thermus_A	3.81784	AC	3.66877	0.0144586528888
Bacteria.Firmicutes_A.Clostridia.Tissierellales.Peptoniphilaceae.Parvimonas.Parvimonas_parva	1.69881			-
Bacteria.Proteobacteria.Gammaproteobacteria.Burkholderiales.SG8_41	0.0655015			-
Bacteria.Firmicutes_A.Clostridia.TANB77.CAG_508.Merdicola	1.4431			-
Bacteria.Bacteroidota.Bacteroidia.Bacteroidales.Porphyromonadaceae.Porphyromonas_A.Porphyromonas_A_859423_pasteri	3.79456			-
Bacteria.Firmicutes_A.Clostridia.Oscillospirales.Acutalibacteraceae.Eubacterium_R	0.84444			-
Bacteria.Firmicutes_C.Negativicutes.Selenomonadales.Selenomonadaceae.Centipeda.Selenomonas_timonae	0.529814			-
Bacteria.Bacteroidota.Bacteroidia.Bacteroidales.Paludibacteraceae.F0058.F0058_sp000163695	2.11882			-
Bacteria.Bacteroidota.Bacteroidia.Chitinophagales	2.24912			-
Bacteria.Bacteroidota.Bacteroidia.Bacteroidales.Muribaculaceae.Paramuribaculum	2.51608			-
Bacteria.Actinobacteriota.Acidimicrobiia.Acidimicrobiales.JACDCH01.VFJN01	2.80691			-
Bacteria.Bacteroidota.Bacteroidia.Bacteroidales.Bacteroidaceae.Bacteroides_H	2.68211			-
Bacteria.Actinobacteriota.Actinomycetia.Actinomycetales.Actinomycetaceae.Pauljensenia.Pauljensenia_sp000185285	1.05542			-
Bacteria.Bacteroidota.Bacteroidia.Bacteroidales.Bacteroidaceae	4.74722			-
Bacteria.Patescibacteria.JAEDAM01.BD1_5	2.57073			-
Bacteria.Proteobacteria.Gammaproteobacteria.Lysobacterales.Lysobacteraceae	0			-
Bacteria.Acidobacteriota.Thermoanaerobaculia.UBA5704.UBA5704	0.185709			-
Bacteria.Desulfobacterota_I.Desulfovibrionia.Desulfovibrionales.Desulfovibrionaceae.Bilophila.Bilophila_wadsworthia	0.0402189990508			-
Bacteria.Bacteroidota.Bacteroidia.Bacteroidales.Marinifilaceae.Odoribacter.Odoribacter_denticanis	1.40846			-
Bacteria.Actinobacteriota.Actinomycetia.Actinomycetales.Actinomycetaceae.Actinomyces.Actinomyces_gerencseriae	1.37378			-
Bacteria.Proteobacteria.Gammaproteobacteria.Enterobacterales_A.Enterobacteriaceae_A	3.75589			-
Bacteria.Firmicutes_A.Clostridia.Christensenellales.UBA1242.UMGS2069	0.0950297966485			-
Bacteria.Actinobacteriota.Actinomycetia.Mycobacteriales.Micromonosporaceae.Micromonospora_H	3.41599			-
Bacteria.Proteobacteria.Alphaproteobacteria.Micavibrionales.Micavibrionaceae.UBA7657	0			-
Bacteria.Firmicutes_A.Clostridia.Oscillospirales.Ruminococcaceae.Ruminococcus_D	0.0248664832659			-
Bacteria.Firmicutes_A.Clostridia.Lachnospirales.Lachnospiraceae.Johnsonella	3.37009	AC	2.88989	0.0149765772286
Bacteria.Actinobacteriota.Thermoleophilia.Gaiellales.Gaiellaceae.Gaiella.Gaiella_occulta	2.53644			-
Bacteria.Firmicutes_D.Bacilli.Staphylococcales.Gemellaceae	4.57538			-
Bacteria.Proteobacteria.Gammaproteobacteria.Xanthomonadales.Xanthomonadaceae.Luteimonas_C	0.328816			-
Bacteria.Proteobacteria.Gammaproteobacteria.Steroidobacterales.Steroidobacteraceae.ZC4RG30	0			-
Bacteria.Bacteroidota.Bacteroidia.Bacteroidales.Bacteroidaceae.Prevotella.Prevotella_micans	1.85584			-
Bacteria.Proteobacteria.Gammaproteobacteria.Burkholderiales.Neisseriaceae.Kingella_B	1.38681			-
Bacteria.Proteobacteria.Gammaproteobacteria.Burkholderiales.Neisseriaceae.Kingella_A	2.13008			-
Bacteria.Firmicutes_C.Negativicutes.Veillonellales.Veillonellaceae.F0422.F0422_sp001553345	1.70796			-
Bacteria.Proteobacteria.Gammaproteobacteria.Pseudomonadales	4.98587			-
Bacteria.Spirochaetota.Spirochaetia.Treponematales.Treponemataceae.Treponema_B.Treponema_B_986142_medium	0.730353			-
Bacteria.Proteobacteria.Alphaproteobacteria.Sphingomonadales.Sphingomonadaceae.Sphingobium_A	3.36852	AC	3.33617	0.0132796383483
Bacteria.Cyanobacteria.Vampirovibrionia.Gastranaerophilales	2.71141			-
Bacteria.Thermotogota.Thermotogae.Petrotogales	0.558251			-
Bacteria.Proteobacteria.Gammaproteobacteria.Burkholderiales.Burkholderiaceae_A.Methylibium	0.571407			-
Bacteria.Fusobacteriota.Fusobacteriia.Fusobacteriales.Fusobacteriaceae.Fusobacterium_C.Fusobacterium_C_nucleatum	3.9011			-
Bacteria.Desulfobacterota_G.Desulfuromonadia.Geobacterales	2.87794			-
Bacteria.Firmicutes_A.Clostridia.Lachnospirales.Lachnospiraceae.Lachnoanaerobaculum.Lachnoanaerobaculum_sp000296385	1.48226			-
Bacteria.Firmicutes_D.Bacilli.Lactobacillales.Streptococcaceae.Streptococcus.Streptococcus_lactarius	2.29082			-
Bacteria.Bacteroidota.Bacteroidia.Bacteroidales.Muribaculaceae.CAG_485.CAG_485_sp900547755	2.79837			-
Bacteria.Deferribacterota.Deferribacteres	2.64595			-
Bacteria.Bacteroidota.Bacteroidia.Bacteroidales.Paludibacteraceae	2.40805	AC	2.40885	0.0279188173181
Bacteria.Firmicutes_D.Bacilli.Staphylococcales.Gemellaceae.Gemella	4.57538			-
Bacteria.Proteobacteria.Gammaproteobacteria.Pseudomonadales.Cellvibrionaceae.Cellvibrio	3.06773			-
Bacteria.Firmicutes_D.Bacilli.RF39.UBA660	3.24607			-
Bacteria.Firmicutes_A.Clostridia.Lachnospirales.Lachnospiraceae.Shuttleworthia.Shuttleworthia_satelles	2.7504			-
Bacteria.Gemmatimonadota.Gemmatimonadetes.Longimicrobiales.RSA9.RSA9.RSA9_sp003242735	0			-
Bacteria.Firmicutes_A.Clostridia.Peptostreptococcales.Anaerovoracaceae.Eubacterium_B.Eubacterium_B_sulci	2.00578			-
Bacteria.Cyanobacteria.Cyanobacteriia.Phormidesmiales.Phormidesmiaceae	0.248671			-
Bacteria.Firmicutes_A.Clostridia.Lachnospirales.Lachnospiraceae.Blautia_A	0.923411			-
Bacteria.Firmicutes_D.Bacilli.Lactobacillales.Aerococcaceae.Granulicatella.Granulicatella_adiacens	3.71387			-
Bacteria.Synergistota.Synergistia.Synergistales	1.65641			-
Bacteria.Firmicutes_D.Bacilli.RF39.UBA660.Faecimonas.Faecimonas_sp900554315	2.2782			-
Bacteria.Firmicutes_D.Bacilli.Lactobacillales.Lactobacillaceae.Lactobacillus.Lactobacillus_johnsonii	0.576866			-
Bacteria.Bacteroidota.Bacteroidia.Bacteroidales.Bacteroidaceae.Paraprevotella.Paraprevotella_clara	1.71871			-
Bacteria.Proteobacteria.Gammaproteobacteria.Burkholderiales.Neisseriaceae.Neisseria.Neisseria_subflava	3.62234			-
Bacteria.Firmicutes_C.Negativicutes.Selenomonadales.Selenomonadaceae.Centipeda.Centipeda_flueggei	1.47654			-
Bacteria.Patescibacteria.Saccharimonadia.Saccharimonadales.Nanosyncoccaceae.Nanosyncoccus.Nanosyncoccus_sp003979185	2.23555			-
Bacteria.Patescibacteria.Saccharimonadia.Saccharimonadales.UBA10027.SDRW01.SDRW01_sp007845485	0.730353			-
Bacteria.Firmicutes_A.Clostridia.TANB77.CAG_508	3.3843			-
Bacteria.Actinobacteriota.Thermoleophilia.Solirubrobacterales.Solirubrobacteraceae.Baekduia	3.43091			-
Bacteria.Firmicutes_A.Clostridia.Oscillospirales.Ruminococcaceae.Gemmiger_A	0.734941			-
Bacteria.Verrucomicrobiota.Verrucomicrobiae.Verrucomicrobiales	2.97707			-
Bacteria.Bacteroidota.Bacteroidia.Bacteroidales.UBA932.Cryptobacteroides.Cryptobacteroides_sp900546395	0.77253			-
Bacteria.Firmicutes_B.Peptococcia.Peptococcales.Peptococcaceae	2.70054			-
Bacteria.Actinobacteriota.Actinomycetia.Actinomycetales.Micrococcaceae.Rothia	4.73807			-
Bacteria.Acidobacteriota.Acidobacteriae.Acidobacteriales.SbA1	3.23449			-
Bacteria.Bacteroidota.Bacteroidia.Bacteroidales.Bacteroidaceae.Prevotella.Prevotella_sp001553265	2.45312			-
Bacteria.Firmicutes_C.Negativicutes	4.61566			-
Bacteria.Actinobacteriota.Actinomycetia.Actinomycetales.Bifidobacteriaceae.Bifidobacterium	0.8657			-
Bacteria.Firmicutes_B.Peptococcia	2.89745			-
Bacteria.Actinobacteriota.Actinomycetia.Actinomycetales.Bifidobacteriaceae	2.10501	AC	3.45693	0.0274841238516
Bacteria.Firmicutes_B.Desulfotomaculia.Desulfotomaculales.Desulfotomaculaceae	0.730353			-
Bacteria.Actinobacteriota.Coriobacteriia.Coriobacteriales.Eggerthellaceae.Slackia_A.Slackia_A_exigua	2.30458			-
Bacteria.Acidobacteriota.Blastocatellia.Pyrinomonadales.Pyrinomonadaceae.OLB17	0.203051			-
Bacteria.Firmicutes_A.Clostridia.Lachnospirales.Lachnospiraceae.CAG_56	0.114959			-
Bacteria.Proteobacteria.Gammaproteobacteria.Pseudomonadales.Pseudomonadaceae	4.7962			-
Bacteria.Cyanobacteria.Cyanobacteriia	2.12316	NC	2.516	0.0377341939431
Bacteria.Firmicutes_A.Clostridia.Christensenellales.CAG_138.Aphodomorpha.Aphodomorpha_intestinavium	0			-
Bacteria.Bacteroidota.Bacteroidia.Bacteroidales.Bacteroidaceae.Alloprevotella.Alloprevotella_tannerae	3.1585			-
Bacteria.Actinobacteriota.Thermoleophilia.Gaiellales	2.82731			-
Bacteria.Firmicutes_A.Clostridia.Oscillospirales.Butyricicoccaceae.Butyricicoccus_A.Butyricicoccus_A_porcorum	0			-
Bacteria.Desulfobacterota_B.Binatia.Bin18.Bin18	2.46922			-
Bacteria.Bacteroidota.Bacteroidia.Cytophagales	2.76995			-
Bacteria.Firmicutes_C.Negativicutes.Veillonellales.Megasphaeraceae	3.68119			-
Bacteria.Firmicutes_A.Clostridia.Oscillospirales.Oscillospiraceae.Enterenecus	2.90415			-
Bacteria.Bacteroidota.Bacteroidia.Bacteroidales.Bacteroidaceae.Alloprevotella.Alloprevotella_sp002933955	0.864167			-
Bacteria.Proteobacteria.Gammaproteobacteria.Pseudomonadales.Moraxellaceae.Acinetobacter.Acinetobacter_guillouiae	1.22453			-
Bacteria.Firmicutes_A.Clostridia.Lachnospirales.Lachnospiraceae.Johnsonella.Johnsonella_ignava	1.44192			-
Bacteria.Actinobacteriota.Actinomycetia.Actinomycetales.Bifidobacteriaceae.Bifidobacterium.Bifidobacterium_globosum	0.690018			-
Bacteria.Firmicutes_D.Bacilli.Staphylococcales.Gemellaceae.Gemella.Gemella_parahaemolysans	0.795145			-
Bacteria.Fusobacteriota.Fusobacteriia.Fusobacteriales.Fusobacteriaceae.Fusobacterium_C	4.64515	AC	4.14165	0.0443780981014
Bacteria.Proteobacteria.Gammaproteobacteria.Burkholderiales.Neisseriaceae.Neisseria.Neisseria_perflava	0.573667			-
Bacteria.Campylobacterota.Campylobacteria.Campylobacterales.Campylobacteraceae.Campylobacter_A.Campylobacter_A_concisus	0.839308			-
Bacteria.Patescibacteria.Saccharimonadia.Saccharimonadales.UBA10027	0.730353			-
Bacteria.Patescibacteria.Saccharimonadia.Saccharimonadales.Nanoperiomorbaceae.Nanoperiomorbus	1.70076			-
Bacteria.Proteobacteria.Gammaproteobacteria.Burkholderiales.Neisseriaceae.Neisseria.Neisseria_bacilliformis	2.7234			-
Bacteria.Firmicutes_A.Clostridia.Oscillospirales.Oscillospiraceae.Dysosmobacter	3.42296			-
Bacteria.Actinobacteriota.Acidimicrobiia.Acidimicrobiales.JACDCH01	2.80691			-
Bacteria.Thermosulfidibacterota.Thermosulfidibacteria.Thermosulfidibacterales	2.95446			-
Bacteria.Bacteroidota.Bacteroidia.Bacteroidales.Tenuifilaceae	1.63244			-
Bacteria.Firmicutes_A.Clostridia	4.98281			-
Bacteria.Gemmatimonadota.Gemmatimonadetes.Gemmatimonadales.Gemmatimonadaceae.UBA4720.UBA4720_sp902812375	0.362515			-
Bacteria.Firmicutes_D.Bacilli.Erysipelotrichales.Erysipelotrichaceae.Clostridium_AQ.Clostridium_AQ_innocuum	2.03465			-
Bacteria.Firmicutes_B.Peptococcia.Peptococcales.Peptococcaceae.Peptococcus	2.70054			-
Bacteria.Proteobacteria.Gammaproteobacteria.Pseudomonadales.Moraxellaceae.Psychrobacter	2.09496			-
Bacteria.Actinobacteriota.Actinomycetia.Actinomycetales.Actinomycetaceae.Pauljensenia.Schaalia_odontolytica	3.33939			-
Bacteria.Proteobacteria.Alphaproteobacteria.Rhizobiales_A.Rhizobiaceae_A.Chelativorans.Chelativorans_composti	0.242421			-
Bacteria.Firmicutes_A.Clostridia.Lachnospirales.Anaerotignaceae	0.677694			-
Bacteria.Deinococcota.Deinococci.Deinococcales.Trueperaceae	1.5889	NC	3.09361	0.0322287762077
Bacteria.Firmicutes_A.Clostridia.Lachnospirales.Lachnospiraceae.COE1	2.18319			-
Bacteria.Firmicutes_A.Clostridia.Peptostreptococcales.Anaerovoracaceae.Eubacterium_B	3.70276			-
Bacteria.Spirochaetota.Leptospirae.Turneriellales.Turneriellaceae.Turneriella	1.90056			-
Bacteria.Deinococcota.Deinococci.Deinococcales.Trueperaceae.JAABTL01.JAABTL01_sp011390735	0.799715			-
Bacteria.Armatimonadota.Fimbriimonadia.Fimbriimonadales.Fimbriimonadaceae.55_13	0			-
Bacteria.Firmicutes_A.Clostridia.Lachnospirales.Lachnospiraceae.Mediterraneibacter_A	3.25369			-
Bacteria.Actinobacteriota.Actinomycetia.Propionibacteriales.Propionibacteriaceae.Arachnia.Arachnia_propionica	0.674436			-
Bacteria.Chloroflexota.Limnocylindria.Limnocylindrales	2.73471			-
Bacteria.Firmicutes_B.Desulfotomaculia.Desulfotomaculales	0.730353			-
Bacteria.Acidobacteriota.Thermoanaerobaculia.UBA5704.UBA5704.JACTMI01.JACTMI01_sp011525905	0.185709			-
Bacteria.Bacteroidota.Bacteroidia.Chitinophagales.Chitinophagaceae.Niabella	0.168992			-
Bacteria.Bacteroidota.Bacteroidia.Chitinophagales.Chitinophagaceae	2.24912			-
Bacteria.Firmicutes_D.Bacilli.Erysipelotrichales.Coprobacillaceae.Eggerthia	1.78858			-
Bacteria.Fusobacteriota.Fusobacteriia.Fusobacteriales.Leptotrichiaceae.Streptobacillus.Streptobacillus_canis	0.462187			-
Bacteria.Acidobacteriota.Vicinamibacteria.Vicinamibacterales.UBA2999.WHSN01.WHSN01_sp902826465	0.0614854646116			-
Bacteria.Fibrobacterota.Fibrobacteria.Fibrobacterales	0.0212241963316			-
Bacteria.Cyanobacteria.Vampirovibrionia.Gastranaerophilales.Gastranaerophilaceae.CAG_196	2.2985			-
Bacteria.Actinobacteriota.Coriobacteriia.Coriobacteriales.Atopobiaceae.Olsenella_I	1.50446			-
Bacteria.Actinobacteriota.Coriobacteriia.Coriobacteriales.Atopobiaceae.Olsenella_H	2.58301			-
Bacteria.Patescibacteria.Saccharimonadia.Saccharimonadales.Nanogingivalaceae.Nanogingivalis.Nanogingivalis_gingivitcus	2.28432			-
Bacteria.Proteobacteria.Gammaproteobacteria.Burkholderiales.Burkholderiaceae_A.Diaphorobacter_A.Diaphorobacter_A_589305_nitroreducens	3.62102			-
Bacteria.Proteobacteria.Gammaproteobacteria.Enterobacterales_A.Pasteurellaceae.Aggregatibacter	4.10079	AC	3.83284	0.0176252474349
Bacteria.Firmicutes_A.Clostridia.Lachnospirales.Lachnospiraceae.Blautia_A.Blautia_A_141781_glucerasea	0.422447			-
Bacteria.Bacteroidota.Bacteroidia.Bacteroidales.Marinifilaceae.Odoribacter.Odoribacter_splanchnicus	2.35218			-
Bacteria.Actinobacteriota.Acidimicrobiia.UBA5794.UBA5794.SZUA_442	0			-
Bacteria.Proteobacteria.Gammaproteobacteria.Burkholderiales.Neisseriaceae	4.40919			-
Bacteria.Armatimonadota	0			-
Bacteria.Firmicutes_A.Clostridia.Peptostreptococcales.Peptostreptococcaceae.Romboutsia_B.Romboutsia_B_ilealis	0.24027			-
Bacteria.Proteobacteria.Alphaproteobacteria.Sphingomonadales.Sphingomonadaceae.Novosphingobium.Novosphingobium_sediminicola	1.67694			-
Bacteria.Bacteroidota.Bacteroidia.Bacteroidales.Paludibacteraceae.RF16	2.09489			-
Bacteria.Bacteroidota.Bacteroidia.Bacteroidales.Porphyromonadaceae.Porphyromonas_A.Porphyromonas_A_859424_uenonis	1.25035			-
Bacteria.Actinobacteriota.Coriobacteriia.Coriobacteriales.Atopobiaceae.Lancefieldella	4.00478			-
Bacteria.Proteobacteria	5.39739			-
Bacteria.Proteobacteria.Alphaproteobacteria.Sphingomonadales.Sphingomonadaceae.Sphingomonas_L	3.77748			-
Bacteria.Bacteroidota.Bacteroidia	4.9381			-
Bacteria.Proteobacteria.Gammaproteobacteria.Xanthomonadales.Xanthomonadaceae.Lysobacter_A	0.0989237208752			-
Bacteria.Campylobacterota.Campylobacteria.Campylobacterales.Campylobacteraceae.Campylobacter_A.Campylobacter_A_rectus	0.407559			-
Bacteria.Proteobacteria.Gammaproteobacteria.Burkholderiales.Burkholderiaceae_A.Comamonas_F.Delftia_deserti	2.47884			-
Bacteria.Bacteroidota.Bacteroidia.Flavobacteriales.Flavobacteriaceae.Capnocytophaga.Capnocytophaga_ochracea	2.30054			-
Bacteria.Firmicutes_A.Clostridia.Peptostreptococcales.Anaerovoracaceae.Aminipila	0.313044			-
Bacteria.Proteobacteria.Gammaproteobacteria.Burkholderiales.Burkholderiaceae_A.Cupriavidus.Wautersia_numazuensis	0.506117			-
Bacteria.Proteobacteria.Alphaproteobacteria.Rhodobacterales	3.33493			-
Bacteria.Actinobacteriota.Actinomycetia.Mycobacteriales.Mycobacteriaceae.Rhodococcus_C	3.22869			-
Bacteria.Proteobacteria.Alphaproteobacteria.Sphingomonadales.Sphingomonadaceae.Sphingomonas_L.Sphingomonas_L_486704_sp001421355	2.09898			-
Bacteria.Proteobacteria.Gammaproteobacteria.Methylococcales.Methylococcaceae.UBA6136.UBA6136_sp009922685	0			-
Bacteria.Bacteroidota.Bacteroidia.Bacteroidales.Muribaculaceae.CAG_485.CAG_485_sp002493045	2.88035			-
Bacteria.Chloroflexota.Anaerolineae.Anaerolineales.EnvOPS12.UBA12294	2.31373			-
Bacteria.Fusobacteriota.Fusobacteriia	4.71671			-
Bacteria.Deferribacterota	2.64595			-
Bacteria.Actinobacteriota.Coriobacteriia.Coriobacteriales	4.10574			-
Bacteria.Bacteroidota.Bacteroidia.Flavobacteriales.Flavobacteriaceae.Flavobacterium	3.23819			-
Bacteria.Firmicutes_A.Clostridia.Caldicoprobacterales.Xylanivirgaceae.Xylanivirga	0			-
Bacteria.Actinobacteriota.Thermoleophilia	3.44783			-
Bacteria.Actinobacteriota.Actinomycetia.Actinomycetales.Micrococcaceae.Kocuria.Kocuria_palustris	3.38551			-
Bacteria.Myxococcota_A.UBA9160.UBA9160	2.10233			-
Bacteria.Firmicutes_C.Negativicutes.Veillonellales.Veillonellaceae.Veillonella_A.Veillonella_A_criceti	1.06135			-
Bacteria.Patescibacteria.Paceibacteria.UBA9983_A.JAACPR01	0.429254			-
Bacteria.Proteobacteria.Gammaproteobacteria.Pseudomonadales.Pseudomonadaceae.Pseudomonas_A.Pseudomonas_A_saudiphocaensis	2.98095			-
Bacteria.Cyanobacteria.Vampirovibrionia.Gastranaerophilales.Gastranaerophilaceae.Zag111	1.9548			-
Bacteria.Actinobacteriota.Actinomycetia.Actinomycetales.Actinomycetaceae.Pauljensenia.Pauljensenia_cardiffensis	2.80291			-
Bacteria.Deinococcota.Deinococci	3.81784			-
Bacteria.Firmicutes_A.Clostridia.Lachnospirales.Lachnospiraceae.Choladousia	0.521594			-
Bacteria.Bacteroidota.Bacteroidia.Bacteroidales.Rikenellaceae.Alistipes_A.Alistipes_A_871400_dispar	0.0950297966485			-
Bacteria.Acidobacteriota.Thermoanaerobaculia.UBA5704	0.185709			-
Bacteria.Proteobacteria.Gammaproteobacteria.Burkholderiales.Neisseriaceae.Neisseria.Neisseria_cinerea	2.3129			-
Bacteria.Proteobacteria.Gammaproteobacteria.Pseudomonadales.Moraxellaceae.Acinetobacter.Acinetobacter_ursingii	2.69609			-
Bacteria.Proteobacteria.Gammaproteobacteria.Burkholderiales.Neisseriaceae.Eikenella.Eikenella_corrodens	2.60582			-
Bacteria.Firmicutes_D.Bacilli.Bacillales_B.Anoxybacillaceae.Geobacillus	3.95145			-
Bacteria.Bacteroidota.Bacteroidia.Bacteroidales.Bacteroidaceae.Prevotella.Prevotella_illustrans	2.25163			-
Bacteria.Proteobacteria.Alphaproteobacteria.Sphingomonadales.Sphingomonadaceae.Sphingomonas_L.Sphingomonas_L_486704_guangdongensis	2.35016			-
Bacteria.Spirochaetota.Spirochaetia.Treponematales.Treponemataceae.Treponema_C	1.53845			-
Bacteria.Bacteroidota.Bacteroidia.Bacteroidales.Bacteroidaceae.Prevotella.Prevotella_shahii	2.54493			-
Bacteria.Firmicutes_A.Clostridia.Lachnospirales.Lachnospiraceae.Catonella	3.43931			-
Bacteria.Actinobacteriota.Actinomycetia.Actinomycetales.Actinomycetaceae.Actinomyces.Actinomyces_dentalis	2.82723			-
Bacteria.Proteobacteria.Alphaproteobacteria.Rhizobiales_A.Xanthobacteraceae.Bradyrhizobium	2.85676			-
Bacteria.Bacteroidota.Bacteroidia.Bacteroidales.Bacteroidaceae.Prevotella.Prevotella_saccharolytica	0.798505			-
Bacteria.Proteobacteria.Gammaproteobacteria.Pseudomonadales.Moraxellaceae.Acinetobacter.Acinetobacter_bereziniae	3.89793			-
Bacteria.Actinobacteriota.Actinomycetia.Propionibacteriales.Propionibacteriaceae.Arachnia.Arachnia_oleiagri	0.758122			-
Bacteria.Actinobacteriota.Actinomycetia.Actinomycetales.Actinomycetaceae.Peptidiphaga	3.82279			-
Bacteria.Patescibacteria.Paceibacteria.UBA9983_A.UBA2103	1.76223			-
Bacteria.Proteobacteria.Gammaproteobacteria.Burkholderiales.Neisseriaceae.Neisseria.Neisseria_elongata	2.96259			-
Bacteria.Firmicutes_A.Clostridia.Clostridiales.Clostridiaceae.Clostridium_T.Clostridium_T_beijerinckii	1.9801			-
Bacteria.Proteobacteria.Gammaproteobacteria.Xanthomonadales.Xanthomonadaceae	2.90486			-
Bacteria.Firmicutes_A.Clostridia.Lachnospirales.Lachnospiraceae.Acetatifactor.Acetatifactor_sp011959105	2.55466			-
Bacteria.Proteobacteria.Alphaproteobacteria.RF32.CAG_239.51_20.51_20_sp900542055	0.241593			-
Bacteria.Firmicutes_D.Bacilli.Mycoplasmatales.Metamycoplasmataceae.Metamycoplasma.Metamycoplasma_salivarium	0.311542			-
Bacteria.Actinobacteriota.Coriobacteriia.Coriobacteriales.Atopobiaceae.Lancefieldella.Lancefieldella_sp000411555	0.698664			-
Bacteria.Bacteroidota.Bacteroidia.Bacteroidales.Muribaculaceae.UBA7173.UBA7173_sp002491305	2.60895			-
Bacteria.Firmicutes_A.Clostridia.TANB77.CAG_508.UMGS1994.UMGS1994_sp900553945	0.903207			-
Bacteria.Bacteroidota.Bacteroidia.Bacteroidales.Marinifilaceae	2.35412			-
Bacteria.Actinobacteriota.Actinomycetia.Mycobacteriales.Mycobacteriaceae.Corynebacterium.Corynebacterium_pseudodiphtheriticum	0.993897			-
Bacteria.Deinococcota	3.81784			-
Bacteria.Firmicutes_D.Bacilli.Erysipelotrichales.Erysipelotrichaceae.Bulleidia.Bulleidia_extructa	2.70045			-
Bacteria.Bacteroidota.Rhodothermia.Rhodothermales.Rhodothermaceae	2.78446			-
Bacteria.Firmicutes_C.Negativicutes.Veillonellales.Megasphaeraceae.Anaeroglobus	3.68119			-
Bacteria.Firmicutes_A.Clostridia.Peptostreptococcales	4.57753			-
Bacteria.Desulfobacterota_I.Desulfovibrionia.Desulfovibrionales.Desulfovibrionaceae.Desulfovibrio_R.Desulfovibrio_R_446353_fairfieldensis	0.0641782752976			-
Bacteria.Bacteroidota.Bacteroidia.Bacteroidales.Bacteroidaceae.Alloprevotella	3.80891			-
Bacteria.Proteobacteria.Gammaproteobacteria.Xanthomonadales.Xanthomonadaceae.Arenimonas.Arenimonas_oryziterrae	0			-
Bacteria.Patescibacteria.Microgenomatia.GWA2_44_7	1.00457			-
Bacteria.Firmicutes_A.Clostridia.Oscillospirales.CAG_272.RUG13077	2.52565			-
Bacteria.Bacteroidota.Bacteroidia.Bacteroidales.Bacteroidaceae.Paraprevotella	1.8019			-
Bacteria.Proteobacteria.Gammaproteobacteria.Xanthomonadales	2.90486			-
Bacteria.Bacteroidota.Bacteroidia.Flavobacteriales.Flavobacteriaceae.Capnocytophaga.Capnocytophaga_sputigena	2.65198			-
Bacteria.Proteobacteria.Gammaproteobacteria.Burkholderiales.Burkholderiaceae_A.Ramlibacter	3.7077			-
Bacteria.Campylobacterota.Campylobacteria.Campylobacterales.Helicobacteraceae	3.11868			-
Bacteria.Proteobacteria.Alphaproteobacteria.Rhodobacterales.Rhodobacteraceae	3.33493			-
Bacteria.Patescibacteria	3.78443			-
Bacteria.Actinobacteriota.Actinomycetia.Mycobacteriales.Geodermatophilaceae.Blastococcus	2.83138			-
Bacteria.Proteobacteria.Gammaproteobacteria.Burkholderiales.Burkholderiaceae_A.Tepidimonas.Tepidimonas_ignava	2.96376			-
Bacteria.Cyanobacteria.Sericytochromatia.UBA7694.UBA7694	0			-
Bacteria.Bacteroidota.Bacteroidia.Bacteroidales.Bacteroidaceae.Alloprevotella.Alloprevotella_sp900095835	3.70381			-
Bacteria.Actinobacteriota.Coriobacteriia.Coriobacteriales.Coriobacteriaceae	1.76057			-
Bacteria.Firmicutes_A.Clostridia.Peptostreptococcales.Filifactoraceae	3.48058			-
Bacteria.Actinobacteriota.Actinomycetia.Actinomycetales.Actinomycetaceae.Actinomyces.Actinomyces_sp000220835	3.38535			-
Bacteria.Firmicutes_D.Bacilli.Bacillales_H.Bacillaceae_D	2.57938			-
Bacteria.Deinococcota.Deinococci.Deinococcales.Thermaceae.Thermus_A.Thermus_A_thermamylovorans	3.58021	AC	3.4189	0.0132796383483
Bacteria.Proteobacteria.Alphaproteobacteria.Rhizobiales_A.Beijerinckiaceae.Methylobacterium	3.99147			-
Bacteria.Firmicutes_A.Clostridia.Lachnospirales.Lachnospiraceae.CAG_632.CAG_632_sp900539185	2.62256			-
Bacteria.Actinobacteriota.Actinomycetia.Mycobacteriales.Micromonosporaceae.Rhizocola	3.18904			-
Bacteria.Proteobacteria.Alphaproteobacteria	4.42958			-
Bacteria.Firmicutes_D.Bacilli.Erysipelotrichales.Erysipelotrichaceae.Erysipelothrix	0.594399			-
Bacteria.Acidobacteriota.Blastocatellia	0.203051			-
Bacteria.Firmicutes_A.Clostridia.Lachnospirales.Lachnospiraceae.UBA3282.UBA3282_sp003611805	3.35739	AC	3.19387	0.00628034645457
Bacteria.Firmicutes_D.Bacilli.Lactobacillales.Lactobacillaceae	4.43996			-
Bacteria.Bacteroidota.Bacteroidia.Bacteroidales.Bacteroidaceae.Prevotella.Prevotella_melaninogenica	4.13205			-
Bacteria.Actinobacteriota.Actinomycetia.Actinomycetales.Beutenbergiaceae	0.466959			-
Bacteria.Actinobacteriota.Actinomycetia.Actinomycetales.Bifidobacteriaceae.Bifidobacterium.Bifidobacterium_pullorum_B	0.140869			-
Bacteria.Cyanobacteria.Sericytochromatia.UBA7694	0			-
Bacteria.Proteobacteria.Gammaproteobacteria.Pseudomonadales.Pseudomonadaceae.Pseudomonas_E.Pseudomonas_E_648040_mendocina	0.494117			-
Bacteria.Firmicutes_D.Bacilli.Lactobacillales.Catellicoccaceae	0.437853			-
Bacteria.Firmicutes_A.Clostridia.Christensenellales.CAG_314.CAG_314	0.35181			-
Bacteria.Actinobacteriota.Coriobacteriia.Coriobacteriales.Eggerthellaceae.Adlercreutzia.Adlercreutzia_muris	2.49842			-
Bacteria.Bacteroidota.Bacteroidia.Bacteroidales.Porphyromonadaceae.Porphyromonas_A.Porphyromonas_A_859424_endodontalis	3.80216			-
Bacteria.Firmicutes_D.Bacilli.Paenibacillales	0.0789797023001			-
Bacteria.Firmicutes_D.Bacilli.Bacillales_B.DSM_18226	1.99341			-
Bacteria.Firmicutes_A.Clostridia.Lachnospirales.Lachnospiraceae.Oribacterium.Oribacterium_sinus	3.63786			-
Bacteria.Firmicutes_D.Bacilli.Erysipelotrichales.Erysipelotrichaceae.Faecalibaculum.Faecalibaculum_rodentium	2.94688			-
Bacteria.Proteobacteria.Gammaproteobacteria.Burkholderiales.Burkholderiaceae_A.Comamonas_F.Comamonas_F_589250_aquatica	2.03804			-
Bacteria.Firmicutes_A.Clostridia.Lachnospirales.Vallitaleaceae_A.W11650	0.730353			-
Bacteria.Proteobacteria.Alphaproteobacteria.Caulobacterales.Caulobacteraceae	3.81003			-
Bacteria.Desulfobacterota_I.Desulfovibrionia.Desulfovibrionales	2.15806			-
Bacteria.Acidobacteriota.Thermoanaerobaculia	0.185709			-
Bacteria.Proteobacteria.Gammaproteobacteria.Pseudomonadales.Moraxellaceae.Acinetobacter.Acinetobacter_johnsonii	3.83487			-
Bacteria.Firmicutes_A.Clostridia.Peptostreptococcales.Filifactoraceae.Filifactor.Filifactor_villosus	3.03686			-
Bacteria.Spirochaetota.Spirochaetia.Treponematales.Treponemataceae.GCA_2749205	1.91275			-
Bacteria.Chloroflexota.Chloroflexia.Chloroflexales.Roseiflexaceae.Kouleothrix	0			-
Bacteria.Patescibacteria.Saccharimonadia.Saccharimonadales.Nanosynbacteraceae	3.32058			-
Bacteria.Patescibacteria.Saccharimonadia.Saccharimonadales.Nanosyncoccaceae.Nanosyncoccus	3.18714			-
Bacteria.Cyanobacteria.Cyanobacteriia.Cyanobacteriales.Chroococcidiopsidaceae.Chroococcidiopsis.Chroococcidiopsis_millei	0.97975			-
Bacteria.Firmicutes_D.Bacilli.Lactobacillales.Streptococcaceae.Streptococcus.Streptococcus_agalactiae	0.835391			-
Bacteria.Firmicutes_C.Negativicutes.Veillonellales.Veillonellaceae.Veillonella_A.Veillonella_A_denticariosi	1.37653			-
Bacteria.Proteobacteria.Gammaproteobacteria.Pseudomonadales.Pseudomonadaceae.Pseudomonas_A	3.34802			-
Bacteria.Actinobacteriota.Actinomycetia.Actinomycetales.Dermatophilaceae	2.99328			-
Bacteria.Firmicutes_A.Clostridia.Lachnospirales	4.51377			-
Bacteria.Firmicutes_C.Negativicutes.Veillonellales.Dialisteraceae.Dialister.Dialister_invisus	3.68693			-
Bacteria.Patescibacteria.JAEDAM01.BD1_5.UBA6164	2.41937			-
Bacteria.Bacteroidota.Bacteroidia.Bacteroidales.Bacteroidaceae.Bacteroides_H.Bacteroides_H_acidifaciens	1.59022			-
Bacteria.Bacteroidota.Bacteroidia.Sphingobacteriales.Sphingobacteriaceae	0.759809			-
Bacteria.Firmicutes_A.Clostridia.Tissierellales.Peptoniphilaceae.Anaerococcus.Anaerococcus_octavius	2.65898			-
Bacteria.Proteobacteria.Gammaproteobacteria.Xanthomonadales.Xanthomonadaceae.Stenotrophomonas_A.Stenotrophomonas_A_615274_lactitubi	0.699439			-
Bacteria.Actinobacteriota.Coriobacteriia.Coriobacteriales.Atopobiaceae	4.09879			-
Bacteria.Actinobacteriota.Actinomycetia.Actinomycetales.Actinomycetaceae.Pauljensenia.Pauljensenia_sp000308055	2.78253			-
Bacteria.Firmicutes_D.Bacilli.Lactobacillales.Streptococcaceae.Streptococcus.Streptococcus_troglodytae	0.533391			-
Bacteria.Firmicutes_B	2.89745			-
Bacteria.Firmicutes_C	4.61566			-
Bacteria.Bacteroidota.Bacteroidia.Bacteroidales.UBA11471.UBA11471.UBA11471_sp000434215	0.592226			-
Bacteria.Firmicutes_A	4.9829			-
Bacteria.Verrucomicrobiota.Verrucomicrobiae.Opitutales.Opitutaceae.IMCC26134_A	0			-
Bacteria.Firmicutes_D	5.57958			-
Bacteria.Proteobacteria.Gammaproteobacteria.Enterobacterales_A.Enterobacteriaceae_A.Klebsiella	2.60222			-
Bacteria.Firmicutes_D.Bacilli.Lactobacillales.Aerococcaceae	4.21225	NC	3.76555	0.0343575148295
Bacteria.Actinobacteriota.Actinomycetia.Propionibacteriales.Nocardioidaceae.Nocardioides_A.Nocardioides_A_392796_salarius	2.60042			-
Bacteria.Bacteroidota.Bacteroidia.Bacteroidales.Marinilabiliaceae	2.20601			-
Bacteria.Bacteroidota.Bacteroidia.Bacteroidales.UBA932	1.50554			-
Bacteria.Firmicutes_A.Clostridia.Peptostreptococcales.Anaerovoracaceae.Eubacterium_N.Eubacterium_N_saphenum	3.02304			-
Bacteria.Chloroflexota.Anaerolineae	2.31373			-
Bacteria.Firmicutes_A.Clostridia.Christensenellales.Borkfalkiaceae.Borkfalkia	0			-
Bacteria.Fusobacteriota.Fusobacteriia.Fusobacteriales.Leptotrichiaceae.Oceanivirga.Oceanivirga_salmonicida	0.0674184409133			-
Bacteria.Proteobacteria.Gammaproteobacteria.Burkholderiales.Neisseriaceae.Snodgrassella	3.16837			-
Bacteria.Fusobacteriota.Fusobacteriia.Fusobacteriales	4.71667			-
Bacteria.Actinobacteriota.Actinomycetia.Actinomycetales.Actinomycetaceae.Actinomyces.Actinomyces_oris_A	3.16583			-
Bacteria.Bacteroidota.Bacteroidia.Bacteroidales.Bacteroidaceae.Prevotella.Prevotella_oulorum	2.98754			-
Bacteria.Firmicutes_A.Clostridia.Christensenellales.CAG_138.PeH17.PeH17_sp900542285	0.0273381385789			-
Bacteria.Actinobacteriota.Actinomycetia.Actinomycetales.Beutenbergiaceae.Beutenbergia	0.466959			-
Bacteria.Actinobacteriota.Actinomycetia.Actinomycetales.Dermabacteraceae.Brachybacterium	2.66164			-
Bacteria.Spirochaetota.Spirochaetia.Treponematales.Treponemataceae	2.5927			-
Bacteria.Desulfobacterota_G.Desulfuromonadia.Geobacterales.Geobacteraceae.Geomesophilobacter	2.87794			-
Bacteria.Patescibacteria.Saccharimonadia.Saccharimonadales.Saccharimonadaceae.Saccharimonas	2.6427			-
Bacteria.Firmicutes_D.Bacilli.Lactobacillales.Streptococcaceae.Streptococcus.Streptococcus_mutans	3.40243			-
Bacteria.Bacteroidota.Bacteroidia.Bacteroidales.Muribaculaceae.Duncaniella.Duncaniella_freteri	0			-
Bacteria.Bacteroidota	4.9381			-
Bacteria.Patescibacteria.JAEDAM01.BD1_5.UBA2023.GN02_873.GN02_873_sp003260345	2.03948			-
Bacteria.Desulfobacterota_B.Binatia.Bin18.Bin18.JABFSC01.JABFSC01_sp009692435	2.46922			-
Bacteria.Fusobacteriota.Fusobacteriia.Fusobacteriales.Fusobacteriaceae.Fusobacterium_C.Fusobacterium_C_animalis	2.06383			-
Bacteria.Actinobacteriota.Actinomycetia.Actinomycetales.Bifidobacteriaceae.Scardovia	1.76076			-
Bacteria.Proteobacteria.Alphaproteobacteria.Rhizobiales_A	4.03478			-
Bacteria.Proteobacteria.Alphaproteobacteria.Sphingomonadales.Sphingomonadaceae.Sphingomicrobium	0.0310010026672			-
Bacteria.Actinobacteriota.Actinomycetia.Actinomycetales.Actinomycetaceae	4.9022	NC	4.36827	0.00418453758541
Bacteria.Firmicutes_D.Bacilli.RF39.UBA660.RUG705	0.0404804562992			-
Bacteria.Gemmatimonadota	0.705072			-
Bacteria.Firmicutes_A.Clostridia.Lachnospirales.Lachnospiraceae.Enterocloster	0.10491			-
Bacteria.Proteobacteria.Gammaproteobacteria.Pseudomonadales.Moraxellaceae.Acinetobacter.Acinetobacter_bouvetii	0.763149			-
Bacteria.Firmicutes_D.Bacilli.Bacillales_H.Bacillaceae_D.Shouchella	2.57672			-
Bacteria.Firmicutes_A.Clostridia.TANB77.CAG_508.CAG_269	2.82248			-
Bacteria.Patescibacteria.JAEDAM01.BD1_5.UBA2023.GN02_873	2.03948			-
Bacteria.Gemmatimonadota.Gemmatimonadetes.Gemmatimonadales.GWC2_71_9.DSTP01	0.0212241963316			-
Bacteria.Verrucomicrobiota.Verrucomicrobiae	3.00585			-
Bacteria.Proteobacteria.Alphaproteobacteria.Caulobacterales.Caulobacteraceae.Brevundimonas.Brevundimonas_diminuta	2.07886			-
Bacteria.Gemmatimonadota.Gemmatimonadetes.Gemmatimonadales.Gemmatimonadaceae	0.362515			-
Bacteria.Proteobacteria.Gammaproteobacteria.Pseudomonadales.Pseudomonadaceae.Pseudomonas_E.Pseudomonas_E_648040_yangonensis	3.03546			-
Bacteria.Firmicutes_D.Bacilli.Erysipelotrichales.Erysipelotrichaceae	4.01692			-
Bacteria.Gemmatimonadota.Gemmatimonadetes	0.705072			-
Bacteria.Spirochaetota.Spirochaetia.Sphaerochaetales.Sphaerochaetaceae.Sphaerochaeta_A	0.0289952729563			-
Bacteria.Eisenbacteria.RBG_16_71_46.SZUA_252	0.233397			-
Bacteria.Actinobacteriota.Actinomycetia.Actinomycetales.Actinomycetaceae.Actinomyces.Actinomyces_naeslundii	2.88601			-
Bacteria.Actinobacteriota.Actinomycetia.Propionibacteriales.Nocardioidaceae	2.98998			-
Bacteria.Bacteroidota.Bacteroidia.Flavobacteriales.Weeksellaceae.Kaistella	4.05497			-
Bacteria.Firmicutes_D.Bacilli.Bacillales_H.Bacillaceae_D.Shouchella.Alkalihalobacillus_gibsonii	2.57672			-
Bacteria.Firmicutes_A.Clostridia.Tissierellales.Peptoniphilaceae.Parvimonas	4.13779	AC	3.49328	0.0436101122989
Bacteria.Firmicutes_D.Bacilli.Haloplasmatales_A.Turicibacteraceae.Turicibacter	1.66605			-
Bacteria.Planctomycetota.Phycisphaerae.Phycisphaerales.UBA1924.DSSA01	0.281001			-
Bacteria.Patescibacteria.Microgenomatia.GWA2_44_7.UBA8517	1.00457			-
Bacteria.Firmicutes_A.Clostridia.Peptostreptococcales.Peptostreptococcaceae	4.38938			-
Bacteria.Desulfobacterota_I.Desulfovibrionia.Desulfovibrionales.Desulfovibrionaceae.Bilophila	0.0402189990508			-
Bacteria.Cyanobacteria.Cyanobacteriia.Cyanobacteriales.Coleofasciculaceae.SIO2C1.SIO2C1_sp010672925	1.97451			-
Bacteria.Proteobacteria.Gammaproteobacteria.Enterobacterales_A.Pasteurellaceae.Haemophilus_A.Haemophilus_A_parahaemolyticus	1.04132			-
Bacteria.Firmicutes_A.Clostridia.Oscillospirales.Oscillospiraceae.Lawsonibacter	3.20445			-
Bacteria.Bacteroidota.Bacteroidia.Bacteroidales.Muribaculaceae.CAG_485.CAG_485_sp002362485	2.30303			-
Bacteria.Actinobacteriota.Actinomycetia.Propionibacteriales.Nocardioidaceae.Nocardioides_A	2.98998			-
Bacteria.Bacteroidota.Bacteroidia.Bacteroidales.Muribaculaceae.CAG_873	2.63429			-
Bacteria.Bacteroidota.Bacteroidia.Bacteroidales.Rikenellaceae.Alistipes_A.Alistipes_A_871400_communis	0.165419			-
Bacteria.Proteobacteria.Gammaproteobacteria.Pseudomonadales.Moraxellaceae.Psychrobacter.Psychrobacter_faecalis	2.09496			-
Bacteria.Actinobacteriota.Actinomycetia.Streptosporangiales.Streptosporangiaceae	0.901083			-
Bacteria.Firmicutes_A.Clostridia.Lachnospirales.Lachnospiraceae.Lacrimispora	0.977698			-
Bacteria.Proteobacteria.Gammaproteobacteria.Pseudomonadales.Moraxellaceae.Acinetobacter.Acinetobacter_guerrae	0.663194			-
Bacteria.Firmicutes_A.Clostridia.Lachnospirales.Lachnospiraceae.CAG_510	2.62244			-
Bacteria.Actinobacteriota.Acidimicrobiia.Acidimicrobiales.Ilumatobacteraceae.Ilumatobacter_A.Ilumatobacter_A_fluminis	0.0532261457459			-
Bacteria.Actinobacteriota.Thermoleophilia.Solirubrobacterales.Solirubrobacteraceae.Solirubrobacter	2.72366			-
Bacteria.Bacteroidota.Bacteroidia.Bacteroidales.Muribaculaceae.Duncaniella	2.92778			-
Bacteria.Proteobacteria.Alphaproteobacteria.Rhizobiales_A.Beijerinckiaceae.Methylobacterium.Methylobacterium_bullatum	2.77631			-
Bacteria.Patescibacteria.JAEDAM01.Absconditabacterales.X112.HOT_345.HOT_345_sp003260355	3.24167			-
Bacteria.Proteobacteria.Gammaproteobacteria.Enterobacterales_A	4.86764			-
Bacteria.Bacteroidota.Bacteroidia.Flavobacteriales.Flavobacteriaceae.Capnocytophaga.Capnocytophaga_gingivalis	2.55557			-
Bacteria.Chloroflexota.Limnocylindria.Limnocylindrales.CSP1_4	2.73471			-
Bacteria.Actinobacteriota.Thermoleophilia.Gaiellales.Gaiellaceae.Gaiella	2.53644			-
Bacteria.Proteobacteria.Gammaproteobacteria.Burkholderiales.Rhodocyclaceae.Azonexus.Azonexus_agitatus	0.069875			-
Bacteria.Proteobacteria.Alphaproteobacteria.Caulobacterales.Caulobacteraceae.Brevundimonas.Brevundimonas_terrae	1.49408			-
Bacteria.Firmicutes_A.Clostridia.Clostridiales.Clostridiaceae	3.03621			-
Bacteria.Chloroflexota.Anaerolineae.Anaerolineales	2.31373			-
Bacteria.Bacteroidota.Bacteroidia.Flavobacteriales.Flavobacteriaceae.Capnocytophaga.Capnocytophaga_granulosa	1.69226	AC	3.29428	0.0132796383483
Bacteria.Synergistota.Synergistia	1.65641			-
Bacteria.Bacteroidota.Bacteroidia.Flavobacteriales.Flavobacteriaceae.Flavobacterium.Flavobacterium_keumense	3.23783			-
Bacteria.Bacteroidota.Bacteroidia.Bacteroidales.Rikenellaceae.Alistipes_A.Alistipes_A_871400_sp002362235	1.56381			-
Bacteria.Proteobacteria.Alphaproteobacteria.Acetobacterales	3.42369			-
Bacteria.Firmicutes_A.Clostridia.Tissierellales.Peptoniphilaceae.Peptoniphilus_A	1.75257			-
Bacteria.Firmicutes_C.Negativicutes.Selenomonadales.Selenomonadaceae.Centipeda	3.4936			-
Bacteria.Bacteroidota.Bacteroidia.Flavobacteriales.Flavobacteriaceae.Capnocytophaga.Capnocytophaga_sp000466425	3.01639			-
Bacteria.Firmicutes_D.Bacilli.Lactobacillales.Streptococcaceae.Streptococcus.Streptococcus_infantarius	0.820386			-
Bacteria.Bacteroidota.Bacteroidia.Sphingobacteriales.Sphingobacteriaceae.Sphingobacterium	0.759809			-
Bacteria.Cyanobacteria.Cyanobacteriia.Elainellales.Elainellaceae	0.0641782752976			-
Bacteria.Firmicutes_D.Bacilli.Lactobacillales.Lactobacillaceae.Lactobacillus.Lactobacillus_delbrueckii	1.54349			-
Bacteria.Firmicutes_A.Clostridia.Oscillospirales.Butyricicoccaceae	0.160121			-
Bacteria.Bacteroidota.Bacteroidia.Bacteroidales.Tannerellaceae.Parabacteroides_B.Parabacteroides_B_862066_distasonis	0.732192			-
Bacteria.Firmicutes_A.Clostridia.Lachnospirales.Lachnospiraceae.Eubacterium_F	2.2421			-
Bacteria.Verrucomicrobiota.Verrucomicrobiae.Opitutales.Opitutaceae	0			-
Bacteria.Actinobacteriota.Thermoleophilia.Solirubrobacterales.70_9.VAYN01.VAYN01_sp005885405	2.15608			-
Bacteria.Firmicutes_D.Bacilli.Erysipelotrichales.Erysipelotrichaceae.Faecalibaculum	2.94734			-
Bacteria.Proteobacteria.Gammaproteobacteria.Xanthomonadales.Xanthomonadaceae.Pseudoxanthomonas_A	1.06857	NC	3.43277	0.0181042054621
Bacteria.Firmicutes_A.Clostridia.Lachnospirales.Lachnospiraceae.Oribacterium.Oribacterium_parvum	1.66019			-
Bacteria.Firmicutes_A.Clostridia.Tissierellales.Peptoniphilaceae.Parvimonas.Parvimonas_micra	4.13571			-
Bacteria.Proteobacteria.Gammaproteobacteria.Chromatiales.Sedimenticolaceae	2.05556			-
Bacteria.Proteobacteria.Alphaproteobacteria.Micavibrionales	0			-
Bacteria.Bacteroidota.Bacteroidia.Bacteroidales.Porphyromonadaceae.Porphyromonas_A.Porphyromonas_A_859423_catoniae	1.981			-
Bacteria.Firmicutes_A.Clostridia.Lachnospirales.Lachnospiraceae.Howardella.Howardella_ureilytica	0.790166			-
Bacteria.Proteobacteria.Alphaproteobacteria.Caulobacterales	3.81003			-
Bacteria.Firmicutes_A.Clostridia.Lachnospirales.Lachnospiraceae.Lachnoanaerobaculum.Lachnoanaerobaculum_umeaense	1.36018			-
Bacteria.Patescibacteria.Saccharimonadia.Saccharimonadales	3.62903			-
Bacteria.Proteobacteria.Gammaproteobacteria.Methylococcales.Methylococcaceae	0			-
Bacteria.Patescibacteria.Paceibacteria.UBA9983_A.JAACPR01.JAACPR01	0.429254			-
Bacteria.Actinobacteriota.Actinomycetia.Sporichthyales.Sporichthyaceae	0			-
Bacteria.Actinobacteriota.Actinomycetia.Mycobacteriales.Mycobacteriaceae.Corynebacterium.Corynebacterium_durum	2.72554			-
Bacteria.Thermosulfidibacterota.Thermosulfidibacteria	2.95446			-
Bacteria.Campylobacterota.Campylobacteria.Campylobacterales.Helicobacteraceae.Helicobacter_C.Helicobacter_C_479931_japonicus	0.491303			-
Bacteria.Bacteroidota.Bacteroidia.Bacteroidales.UBA11471.UBA11471	0.592226			-
Bacteria.Bacteroidota.Bacteroidia.Cytophagales.Hymenobacteraceae.Pontibacter	2.61431			-
Bacteria.Firmicutes_D.Bacilli.Erysipelotrichales.Erysipelotrichaceae.Clostridium_AQ	2.03465			-
Bacteria.Firmicutes_D.Bacilli.Lactobacillales.Catellicoccaceae.Catellicoccus	0.437853			-
Bacteria.Proteobacteria.Gammaproteobacteria.Enterobacterales_A.Enterobacteriaceae_A.Pluralibacter.Pluralibacter_gergoviae	3.05568			-
Bacteria.Bacteroidota.Bacteroidia.Bacteroidales.Bacteroidaceae.Bacteroides_H.Bacteroides_H_oleiciplenus	0.0641782752976			-
Bacteria.Actinobacteriota.Actinomycetia	5.19178	NC	4.52762	0.00468834503284
Bacteria.Proteobacteria.Gammaproteobacteria.Burkholderiales.Burkholderiaceae_A.Tepidimonas	2.96417			-
Bacteria.Verrucomicrobiota.Verrucomicrobiae.Opitutales	0			-
Bacteria.Firmicutes_C.Negativicutes.Selenomonadales.Selenomonadaceae.Centipeda.Centipeda_infelix	1.93163			-
Bacteria.Firmicutes_A.Clostridia.Tissierellales.Peptoniphilaceae.Peptoniphilus_A.Peptoniphilus_A_olsenii	0.536968			-
Bacteria.Firmicutes_D.Bacilli.Erysipelotrichales.Coprobacillaceae.Stoquefichus	0			-
Bacteria.Fusobacteriota	4.71671			-
Bacteria.Deferribacterota.Deferribacteres.Deferribacterales.Mucispirillaceae.Mucispirillum	2.64595			-
Bacteria.Actinobacteriota.Actinomycetia.Propionibacteriales.Propionibacteriaceae	3.12729			-
Bacteria.Bacteroidota.Bacteroidia.Bacteroidales.Bacteroidaceae.Prevotella.Prevotella_falsenii	0.54676			-
Bacteria.Bacteroidota.Bacteroidia.Bacteroidales.Bacteroidaceae.Alloprevotella.Alloprevotella_rava	2.89851			-
Bacteria.Proteobacteria.Gammaproteobacteria.Enterobacterales_A.Enterobacteriaceae_A.Citrobacter_A	1.64902			-
Bacteria.Proteobacteria.Gammaproteobacteria.Enterobacterales_A.Pasteurellaceae.Aggregatibacter.Aggregatibacter_segnis	3.75096	AC	3.48845	0.0486069954449
Bacteria.Firmicutes_A.Clostridia.Peptostreptococcales.Anaerovoracaceae.Eubacterium_B.Eubacterium_B_infirmum	3.62619			-
Bacteria.Actinobacteriota.Coriobacteriia.Coriobacteriales.Atopobiaceae.Lancefieldella.Lancefieldella_rimae	3.5447			-
Bacteria.Bacteroidota.Bacteroidia.Bacteroidales.Marinifilaceae.Odoribacter.Odoribacter_laneus	0.00150385224564			-
Bacteria.Proteobacteria.Alphaproteobacteria.Rhizobiales_A.Beijerinckiaceae.Microvirga.Microvirga_sp000745135	0.2616			-
Bacteria.Firmicutes_D.Bacilli.Erysipelotrichales.Erysipelotrichaceae.Dubosiella	3.44687			-
Bacteria.Firmicutes_A.Clostridia.Peptostreptococcales.Filifactoraceae.Peptoanaerobacter.Peptoanaerobacter_stomatis	2.5593			-
Bacteria.Proteobacteria.Gammaproteobacteria	5.36769			-
Bacteria.Bacteroidota.Bacteroidia.Bacteroidales.Bacteroidaceae.Bacteroides_H.Bacteroides_H_fragilis	1.09874			-
Bacteria.Patescibacteria.Saccharimonadia.Saccharimonadales.UBA1547.2011_GWC2_44_17.2011_GWC2_44_17_sp004145215	0			-
Bacteria.Actinobacteriota.Actinomycetia.Actinomycetales.Actinomycetaceae.Actinomyces	4.21769			-
Bacteria.Fusobacteriota.Fusobacteriia.Fusobacteriales.Fusobacteriaceae.Fusobacterium_C.Fusobacterium_C_necrophorum	2.479			-
Bacteria.Proteobacteria.Gammaproteobacteria.Burkholderiales.Burkholderiaceae_A.Aquabacterium_B.Aquabacterium_B_592457_commune	2.71686			-
Bacteria.Thermosulfidibacterota.Thermosulfidibacteria.Thermosulfidibacterales.Thermosulfidibacteraceae.Thermosulfidibacter	2.95446			-
Bacteria.Firmicutes_D.Bacilli.Staphylococcales.Staphylococcaceae.Staphylococcus.Staphylococcus_capitis	1.38566			-
Bacteria.Firmicutes_A.Clostridia.Lachnospirales.Lachnospiraceae.CAG_632	2.62256			-
Bacteria.Bacteroidota.Bacteroidia.Bacteroidales.Tannerellaceae.Tannerella.Tannerella_forsythia	1.8031			-
Bacteria.Proteobacteria.Alphaproteobacteria.Micavibrionales.Micavibrionaceae.UBA7657.UBA7657_sp900696495	0			-
Bacteria.Acidobacteriota.Blastocatellia.Pyrinomonadales.Pyrinomonadaceae.OLB17.OLB17_sp003223025	0.203051			-
Bacteria.Proteobacteria.Alphaproteobacteria.RF32.CAG_239	2.10093			-
Bacteria.Acidobacteriota	3.23519			-
Bacteria.Actinobacteriota.UBA4738.UBA4738.HRBIN12.AC_51	0.99471			-
Bacteria.Bacteroidota.Bacteroidia.Bacteroidales.Muribaculaceae.Muribaculum	2.16759			-
Bacteria.Actinobacteriota.Thermoleophilia.UBA2241.UBA2241	2.2069			-
Bacteria.Firmicutes_A.Clostridia.Oscillospirales.Butyricicoccaceae.Agathobaculum	0.160121			-
Bacteria.Chloroflexota.Limnocylindria.QHBO01.QHBO01.CF_167	1.47207			-
Bacteria.Patescibacteria.Saccharimonadia.Saccharimonadales.Saccharimonadaceae	2.64648			-
Bacteria.Deinococcota.Deinococci.Deinococcales.Trueperaceae.Truepera.Truepera_radiovictrix	1.5119			-
Bacteria.Firmicutes_A.Clostridia.Clostridiales.Clostridiaceae.Clostridium_B.Clostridium_B_tyrobutyricum	2.99626			-
Bacteria.Firmicutes_D.Bacilli.RF39.UBA660.CAG_533	0.0141817703732			-
Bacteria.Firmicutes_A.Clostridia.Peptostreptococcales.Anaerovoracaceae.Hornefia.Hornefia_nodata	3.31876			-
Bacteria.Proteobacteria.Gammaproteobacteria.Burkholderiales.Rhodocyclaceae.Azonexus	0.356456			-
Bacteria.Actinobacteriota.Actinomycetia.Mycobacteriales.Mycobacteriaceae.Corynebacterium.Corynebacterium_argentoratense	3.36836			-
Bacteria.Proteobacteria.Gammaproteobacteria.Xanthomonadales.Xanthomonadaceae.Luteimonas_C.Luteimonas_C_615545_sp000472505	0.328816			-
Bacteria.Actinobacteriota.Actinomycetia.Actinomycetales.Brevibacteriaceae	1.76767			-
Bacteria.Actinobacteriota.Actinomycetia.Actinomycetales.Cellulomonadaceae	0.0205717932115			-
Bacteria.Acidobacteriota.Acidobacteriae.Acidobacteriales.SbA1.Sulfotelmatobacter.Sulfotelmatobacter_sp003166855	3.23449			-
Bacteria.Firmicutes_D.Bacilli.Lactobacillales.Streptococcaceae.Streptococcus.Streptococcus_massiliensis	0.135451			-
Bacteria.Proteobacteria.Alphaproteobacteria.Rhizobiales_A.Methyloligellaceae.Methyloceanibacter	2.71664			-
Bacteria.Firmicutes_D.Bacilli.Lactobacillales.Streptococcaceae.Streptococcus.Streptococcus_anginosus	4.02185			-
Bacteria.Acidobacteriota.Vicinamibacteria.Vicinamibacterales.UBA2999	0.0614854646116			-
Bacteria.Firmicutes_A.Clostridia.Lachnospirales.Lachnospiraceae.Lachnoanaerobaculum.Lachnoanaerobaculum_orale	2.96368			-
Bacteria.Actinobacteriota.Actinomycetia.Mycobacteriales.Mycobacteriaceae.Corynebacterium.Corynebacterium_tuberculostearicum	1.3622			-
Bacteria.Campylobacterota.Campylobacteria.Campylobacterales	3.46141			-
Bacteria.Actinobacteriota.Actinomycetia.Actinomycetales.Microbacteriaceae	3.05316			-
Bacteria.Deinococcota.Deinococci.Deinococcales.Thermaceae	3.81784	AC	3.61479	0.0144586528888
Bacteria.Bacteroidota.Bacteroidia.Cytophagales.Cyclobacteriaceae.ELB16_189.ELB16_189_sp002344795	2.76995			-
Bacteria.Spirochaetota.Spirochaetia.Treponematales	2.5927			-
Bacteria.Actinobacteriota.Actinomycetia.Actinomycetales.Microbacteriaceae.Leifsonia_A	2.29611			-
Bacteria.Proteobacteria.Gammaproteobacteria.Burkholderiales.Burkholderiaceae_A.Paracandidimonas.Paracandidimonas_soli	2.86737			-
Bacteria.Proteobacteria.Alphaproteobacteria.Rhizobiales_A.Xanthobacteraceae	2.86001			-
Bacteria.Fusobacteriota.Fusobacteriia.Fusobacteriales.Fusobacteriaceae.Fusobacterium_C.Fusobacterium_C_periodonticum_D	4.36932			-
Bacteria.Bacteroidota.Bacteroidia.Bacteroidales.Porphyromonadaceae	4.13993			-
Bacteria.Firmicutes_C.Negativicutes.Selenomonadales.Selenomonadaceae.Schwartzia.Schwartzia_succinivorans	1.64607			-
Bacteria.Firmicutes_A.Clostridia.Lachnospirales.Lachnospiraceae.Butyrivibrio_A	3.0563			-
Bacteria.Chloroflexota	2.89175			-
Bacteria.Firmicutes_D.Bacilli.RF39.UBA660.CAG_628	1.84365			-
Bacteria.Desulfobacterota_G.Desulfuromonadia.Geobacterales.Geobacteraceae	2.87794			-
Bacteria.Proteobacteria.Alphaproteobacteria.Caulobacterales.Caulobacteraceae.Brevundimonas.Brevundimonas_nasdae_A	3.80967			-
Bacteria.Bacteroidota.Bacteroidia.Sphingobacteriales.Sphingobacteriaceae.Sphingobacterium.Sphingobacterium_thermophilum	0.759809			-
Bacteria.Firmicutes_D.Bacilli.Erysipelotrichales.Coprobacillaceae.Erysipelatoclostridium	0.0141817703732			-
Bacteria.Proteobacteria.Gammaproteobacteria.Burkholderiales.Burkholderiaceae_A.Acidovorax_A	0.179572			-
Bacteria.Chloroflexota.Limnocylindria	2.75781			-
Bacteria.Actinobacteriota.Actinomycetia.Streptomycetales.Streptomycetaceae	2.02385	NC	2.65561	0.00307038594066
Bacteria.Proteobacteria.Gammaproteobacteria.Burkholderiales.Burkholderiaceae_A.Hydrogenophaga	0.27112			-
Bacteria.Firmicutes_A.Clostridia.TANB77.CAG_508.CAG_269.CAG_269_sp000431335	2.82248			-
Bacteria.Bacteroidota.Bacteroidia.Bacteroidales.Bacteroidaceae.Bacteroides_H.Bacteroides_H_faecichinchillae	0			-
Bacteria.Firmicutes_A.Clostridia.Eubacteriales.Alkalibacteraceae.Alkalibacter.Alkalibacter_saccharofermentans	0.437983			-
Bacteria.Actinobacteriota.Actinomycetia.Propionibacteriales	3.36507			-
Bacteria.Proteobacteria.Gammaproteobacteria.Xanthomonadales.Xanthomonadaceae.Thermomonas	0.226422			-
Bacteria.Spirochaetota.Spirochaetia	2.5927			-
Bacteria.Proteobacteria.Gammaproteobacteria.Burkholderiales.Burkholderiaceae_A.Aquabacterium_B	2.72637			-
Bacteria.Proteobacteria.Gammaproteobacteria.Burkholderiales.Burkholderiaceae_A.Alcaligenes	2.19229			-
Bacteria.Actinobacteriota.Acidimicrobiia.Acidimicrobiales.Ilumatobacteraceae	0.0532261457459			-
Bacteria.Cyanobacteria.Sericytochromatia	0			-
Bacteria.Proteobacteria.Gammaproteobacteria.Chromatiales	2.05556			-
Bacteria.Patescibacteria.JAEDAM01.BD1_5.UBA6164.JAACSU01.JAACSU01_sp010119145	2.41937			-
Bacteria.Firmicutes_A.Clostridia.Lachnospirales.Lachnospiraceae.Merdisoma	2.05222			-
Bacteria.Firmicutes_D.Bacilli.Lactobacillales.Aerococcaceae.Granulicatella.Granulicatella_elegans	3.63051			-
Bacteria.Firmicutes_A.Clostridia.Peptostreptococcales.Anaerovoracaceae.BX12	0.246355			-
Bacteria.Firmicutes_A.Clostridia.Oscillospirales.Ruminococcaceae	2.40739			-
Bacteria.Firmicutes_C.Negativicutes.Veillonellales	4.58191			-
Bacteria.Actinobacteriota.Thermoleophilia.Solirubrobacterales.Solirubrobacteraceae	3.43091			-
Bacteria.Firmicutes_D.Bacilli.Lactobacillales.Lactobacillaceae.Weissella_A	2.34931			-
Bacteria.Proteobacteria.Gammaproteobacteria.Xanthomonadales.Xanthomonadaceae.Stenotrophomonas_A.Stenotrophomonas_A_615274_rhizophila	1.41953			-
Bacteria.Firmicutes_C.Negativicutes.Veillonellales.Dialisteraceae.Dialister	3.68708			-
Bacteria.Deinococcota.Deinococci.Deinococcales.Trueperaceae.JAABTL01	0.799715			-
Bacteria.Firmicutes_A.Clostridia.Oscillospirales.Acutalibacteraceae.Fimenecus.Fimenecus_sp000432435	0.740812			-
Bacteria.Actinobacteriota.UBA4738.UBA4738.HRBIN12	0.99471			-
Bacteria.Cyanobacteria.Cyanobacteriia.Cyanobacteriales.Xenococcaceae.Pleurocapsa	1.20255			-
Bacteria.Campylobacterota.Campylobacteria.Campylobacterales.Helicobacteraceae.Helicobacter_E.Helicobacter_E_pylori_C	0.114959			-
Bacteria.Gemmatimonadota.Gemmatimonadetes.Gemmatimonadales.Gemmatimonadaceae.UBA4720	0.362515			-
Bacteria.Patescibacteria.Paceibacteria.UBA9983_A.JAACPR01.JAACPR01.JAACPR01_sp009995365	0.429254			-
Bacteria.Proteobacteria.Alphaproteobacteria.Caulobacterales.TH1_2.Terricaulis	0			-
Bacteria.Desulfobacterota_I.Desulfovibrionia.Desulfovibrionales.Desulfovibrionaceae.Desulfovibrio_R	1.39426			-
Bacteria.Desulfobacterota_I.Desulfovibrionia.Desulfovibrionales.Desulfovibrionaceae.Desulfovibrio_R.Desulfovibrio_R_446353_sp011039135	0			-
Bacteria.Firmicutes_A.Clostridia.Caldicoprobacterales	0			-
Bacteria.Actinobacteriota.Actinomycetia.Propionibacteriales.Propionibacteriaceae.Acidipropionibacterium	0.0956254204209			-
Bacteria.Proteobacteria.Alphaproteobacteria.Sphingomonadales.Sphingomonadaceae.Sphingomicrobium.Sphingomicrobium_sediminicola	0.0310010026672			-
Bacteria.Actinobacteriota.Actinomycetia.Actinomycetales.Micrococcaceae.Glutamicibacter	3.04734			-
Bacteria.Firmicutes_C.Negativicutes.Selenomonadales	3.66907			-
Bacteria.Proteobacteria.Alphaproteobacteria.Rs_D84.Rs_D84.Enterousia	0.330025			-
Bacteria.Campylobacterota.Campylobacteria.Campylobacterales.Helicobacteraceae.Helicobacter_D.Helicobacter_D_ganmani	2.62248			-
Bacteria.Bacteroidota.Bacteroidia.Bacteroidales.Muribaculaceae.Paramuribaculum.Paramuribaculum_sp001689565	0.12478			-
Bacteria.Proteobacteria.Gammaproteobacteria.Burkholderiales.Neisseriaceae.Neisseria.Morococcus_cerebrosus	0.226422			-
Bacteria.Bacteroidota.Bacteroidia.Bacteroidales.Bacteroidaceae.Prevotella.Prevotella_buccae	1.94902			-
Bacteria.Actinobacteriota.Actinomycetia.Streptomycetales.Streptomycetaceae.Streptomyces_G	1.95335	NC	2.50752	0.0101112607129
Bacteria.Cyanobacteria.Cyanobacteriia.Elainellales.Elainellaceae.O_77	0.0641782752976			-
Bacteria.Firmicutes_A.Clostridia.Lachnospirales.Lachnospiraceae.UBA3282	3.35739	AC	3.17073	0.00628034645457
Bacteria.Firmicutes_A.Clostridia.Lachnospirales.Lachnospiraceae.Shuttleworthia	2.7504			-
Bacteria.Actinobacteriota.Actinomycetia.Actinomycetales.Actinomycetaceae.Pauljensenia.Pauljensenia_odontolytica_A	1.35865			-
Bacteria.Deferribacterota.Deferribacteres.Deferribacterales	2.64595			-
Bacteria.Proteobacteria.Gammaproteobacteria.Pseudomonadales.Moraxellaceae	4.67843			-
Bacteria.Proteobacteria.Gammaproteobacteria.Burkholderiales.Neisseriaceae.Neisseria	4.39015			-
Bacteria.Actinobacteriota.Actinomycetia.Actinomycetales.Actinomycetaceae.Actinomyces.Actinomyces_israelii	2.45519			-
Bacteria.Bacteroidota.Rhodothermia.Rhodothermales.Rhodothermaceae.Rhodothermus	2.78446			-
Bacteria.Firmicutes_D.Bacilli.Lactobacillales.Lactobacillaceae.Limosilactobacillus	3.44084			-
Bacteria.Proteobacteria.Gammaproteobacteria.Steroidobacterales	0.613055			-
Bacteria.Armatimonadota.Fimbriimonadia.Fimbriimonadales.Fimbriimonadaceae	0			-
Bacteria.Proteobacteria.Alphaproteobacteria.Caulobacterales.TH1_2	0			-
Bacteria.Patescibacteria.Microgenomatia	1.00457			-
Bacteria.Proteobacteria.Alphaproteobacteria.Sphingomonadales.Sphingomonadaceae	3.93091			-
Bacteria.Actinobacteriota.Coriobacteriia.Coriobacteriales.Coriobacteriaceae.Collinsella	1.76057			-
Bacteria.Planctomycetota.Phycisphaerae.Phycisphaerales	0.281001			-
Bacteria.Firmicutes_A.Clostridia.Oscillospirales.Butyricicoccaceae.Butyricicoccus_A	0			-
Bacteria.Bacteroidota.Bacteroidia.Flavobacteriales.Flavobacteriaceae.Flavobacterium.Flavobacterium_sinopsychrotolerans	0.15366			-
Bacteria.Firmicutes_C.Negativicutes.Veillonellales.Veillonellaceae.Veillonella_A	4.43476			-
Bacteria.Firmicutes_A.Clostridia.Oscillospirales.Ruminococcaceae.Fournierella.Fournierella_massiliensis	2.3821			-
Bacteria.Proteobacteria.Gammaproteobacteria.Enterobacterales_A.Pasteurellaceae.Haemophilus_D.Haemophilus_D_735815_pittmaniae	2.32296			-
Bacteria.Firmicutes_C.Negativicutes.Acidaminococcales.Acidaminococcaceae.Phascolarctobacterium_A	0			-
Bacteria.Proteobacteria.Alphaproteobacteria.Rs_D84	0.330025			-
Bacteria.Proteobacteria.Gammaproteobacteria.Enterobacterales_A.Pasteurellaceae.Actinobacillus_C.Actinobacillus_C_733574_minor	0.25507			-
Bacteria.Proteobacteria.Alphaproteobacteria.Rhizobiales_A.Beijerinckiaceae.Microvirga	3.05404			-
Bacteria.Proteobacteria.Gammaproteobacteria.Pseudomonadales.Moraxellaceae.Acinetobacter.Acinetobacter_beijerinckii	0.394349			-
Bacteria.Firmicutes_C.Negativicutes.Selenomonadales.Selenomonadaceae.Schwartzia	1.64607			-
Bacteria.Firmicutes_A.Clostridia.TANB77.CAG_508.UMGS1994	0.903207			-
Bacteria.Firmicutes_A.Clostridia.Lachnospirales.Lachnospiraceae.Ventrimonas.Ventrimonas_sp003611875	2.5307			-
Bacteria.Actinobacteriota.UBA4738	0.99471			-
Bacteria.Firmicutes_A.Clostridia.Peptostreptococcales.Anaerovoracaceae.Eubacterium_N	3.02304			-
Bacteria.Firmicutes_D.Bacilli.Staphylococcales.Staphylococcaceae.Staphylococcus	3.91985			-
Bacteria.Myxococcota_A.UBA9160.UBA9160.PR03.CAADGG01	2.10233			-
Bacteria.Proteobacteria.Gammaproteobacteria.Enterobacterales_A.Enterobacteriaceae_A.Escherichia	1.6414			-
Bacteria.Actinobacteriota.Actinomycetia.Actinomycetales.Bifidobacteriaceae.Scardovia.Scardovia_wiggsiae	1.76076			-
Bacteria.Proteobacteria.Gammaproteobacteria.Burkholderiales.Burkholderiaceae_A.Rubrivivax.Rubrivivax_sp001295905	0			-
Bacteria.Proteobacteria.Alphaproteobacteria.Rhizobiales_A.Rhizobiaceae_A.Agrobacterium	0.782438			-
Bacteria.Firmicutes_A.Clostridia.Peptostreptococcales.Filifactoraceae.Peptoanaerobacter.Eubacterium_yurii	3.15391	AC	3.01629	0.000277108358593
Bacteria.Desulfobacterota_I.Desulfovibrionia.Desulfovibrionales.Desulfomicrobiaceae.Desulfomicrobium	2.06534			-
Bacteria.Proteobacteria.Gammaproteobacteria.Steroidobacterales.Steroidobacteraceae.Povalibacter	0.347258			-
Bacteria.Firmicutes_D.Bacilli.Erysipelotrichales.Erysipelotrichaceae.Erysipelothrix.Erysipelothrix_rhusiopathiae	0.594399			-
Bacteria.Spirochaetota.Spirochaetia.Treponematales.Treponemataceae.Treponema_D.Treponema_D_socranskii	2.22325			-
Bacteria.Bacteroidota.Bacteroidia.Flavobacteriales.Weeksellaceae.Kaistella.Kaistella_gelatinilytica	0.285061			-
Bacteria.Firmicutes_A.Clostridia.Peptostreptococcales.Peptostreptococcaceae.Peptostreptococcus	4.36805			-
Bacteria.Bacteroidota.Bacteroidia.Bacteroidales.Porphyromonadaceae.Porphyromonas_A.Porphyromonas_A_859423_gingivalis	3.05581			-
Bacteria.Firmicutes_A.Clostridia.Oscillospirales.Oscillospiraceae.CAG_83	2.92874			-
Bacteria.Firmicutes_A.Clostridia.Oscillospirales.UBA644.UBA644.UBA644_sp002299265	2.05227			-
Bacteria.Chloroflexota.Limnocylindria.QHBO01.QHBO01	1.47207			-
Bacteria.Deferribacterota.Deferribacteres.Deferribacterales.Mucispirillaceae.Mucispirillum.Mucispirillum_schaedleri	2.64595			-
Bacteria.Desulfobacterota_I	2.24294			-
Bacteria.Firmicutes_D.Bacilli.RF39.UBA660.Scybalousia	1.6218			-
Bacteria.Firmicutes_A.Clostridia.Tissierellales.Peptoniphilaceae.Anaerococcus	2.65898			-
Bacteria.Firmicutes_A.Clostridia.Tissierellales	4.15634			-
Bacteria.Firmicutes_A.Clostridia.Peptostreptococcales.Anaerovoracaceae.Eubacterium_M.Eubacterium_M_brachy	3.27529			-
Bacteria.Firmicutes_A.Clostridia.Christensenellales.Borkfalkiaceae.Borkfalkia.Borkfalkia_ceftriaxoniphila	0			-
Bacteria.Firmicutes_A.Clostridia.Lachnospirales.Lachnospiraceae.Enterocloster.Enterocloster_asparagiformis	0.10491			-
Bacteria.Desulfobacterota_G	2.87794			-
Bacteria.Chloroflexota.Chloroflexia	0			-
Bacteria.Actinobacteriota.Actinomycetia.Actinomycetales.Dermabacteraceae	2.66164			-
Bacteria.Eisenbacteria.RBG_16_71_46.RBG_16_71_46.RBG_16_71_46.RBG_16_71_46	0			-
Bacteria.Bacteroidota.Bacteroidia.Bacteroidales.Bacteroidaceae.Prevotella.Prevotella_pallens	3.12042			-
Bacteria.Firmicutes_A.Clostridia.Oscillospirales.Acutalibacteraceae.UBA737.UBA737_sp900547445	3.48081			-
Bacteria.Proteobacteria.Gammaproteobacteria.Burkholderiales.Casimicrobiaceae	0.166569			-
Bacteria.Firmicutes_A.Clostridia.Caldicoprobacterales.Xylanivirgaceae	0			-
Bacteria.Fusobacteriota.Fusobacteriia.Fusobacteriales.Leptotrichiaceae.Caviibacter	2.64416			-
Bacteria.Planctomycetota.Phycisphaerae.Phycisphaerales.UBA1924	0.281001			-
Bacteria.Firmicutes_A.Clostridia.Peptostreptococcales.Anaerovoracaceae.Mogibacterium.Mogibacterium_timidum	2.00596			-
Bacteria.Actinobacteriota.Actinomycetia.Actinomycetales.Micrococcaceae.Kocuria	3.38551			-
Bacteria.Actinobacteriota.Actinomycetia.Actinomycetales.Micrococcaceae.Rothia.Rothia_mucilaginosa	2.01228			-
Bacteria.Acidobacteriota.Blastocatellia.Pyrinomonadales.Pyrinomonadaceae	0.203051			-
Bacteria.Firmicutes_A.Clostridia.UBA1381.UBA1381.CAG_41	0.282369			-
Bacteria.Proteobacteria.Alphaproteobacteria.RF32	2.10093			-
Bacteria.Bacteroidota.Bacteroidia.Flavobacteriales.Weeksellaceae.Bergeyella_A	3.54554			-
Bacteria.Proteobacteria.Gammaproteobacteria.Lysobacterales.Lysobacteraceae.Pseudomarimonas	0			-
Bacteria.Eisenbacteria.RBG_16_71_46.RBG_16_71_46.RBG_16_71_46.RBG_16_71_46.RBG_16_71_46_sp001780165	0			-
Bacteria.Campylobacterota.Campylobacteria.Campylobacterales.Campylobacteraceae.Campylobacter_A.Campylobacter_A_showae	2.29508			-
Bacteria.Proteobacteria.Gammaproteobacteria.Burkholderiales.Burkholderiaceae_A.Diaphorobacter_A	3.62102			-
Bacteria.Firmicutes_A.Clostridia.UBA1381.UBA1381	0.282369			-
Bacteria.Cyanobacteria.Cyanobacteriia.Cyanobacteriales.Chroococcidiopsidaceae	1.3175			-
Bacteria.Proteobacteria.Gammaproteobacteria.Steroidobacterales.Steroidobacteraceae	0.613055			-
Bacteria.Proteobacteria.Gammaproteobacteria.Burkholderiales.SG8_41.UBA5216	0.0655015			-
Bacteria.Desulfobacterota_I.Syntrophobacteria.Syntrophobacterales.Syntrophobacteraceae.Syntrophobacterium.Syntrophobacterium_sulfatireducens	0			-
Bacteria.Firmicutes_C.Negativicutes.Veillonellales.Veillonellaceae.Veillonella_A.Veillonella_A_dispar	2.12563			-
Bacteria.Firmicutes_A.Clostridia.Lachnospirales.Anaerotignaceae.Anaerotignum.Anaerotignum_lactatifermentans	0.0655015			-
Bacteria.Bacteroidota.Bacteroidia.Bacteroidales.Bacteroidaceae.Phocaeicola_A	1.21499	NC	3.23906	0.0322287762077
Bacteria.Firmicutes_A.Clostridia.Oscillospirales.Oscillospiraceae.Faecousia	1.11033			-
Bacteria.Firmicutes_A.Clostridia.Oscillospirales.Ruminococcaceae.Faecalibacterium.Faecalibacterium_prausnitzii_C	0.0162742410057			-
Bacteria.Firmicutes_A.Clostridia.Tissierellales.Peptoniphilaceae.W5053.W5053_sp000467935	2.46043			-
Bacteria.Cyanobacteria.Cyanobacteriia.Elainellales	0.0641782752976			-
Bacteria.Patescibacteria.JAEDAM01.Absconditabacterales.X112	3.24167			-
Bacteria.Bacteroidota.Bacteroidia.Bacteroidales.Marinilabiliaceae.JC017.JC017_sp004296775	2.20601			-
Bacteria.Firmicutes_A.Clostridia.Lachnospirales.Anaerotignaceae.Fimicola	0.130112			-
Bacteria.Firmicutes_A.Clostridia.Lachnospirales.Lachnospiraceae.Agathobacter.Agathobacter_rectalis	0.904057			-
Bacteria.Bacteroidota.Bacteroidia.Bacteroidales.Dysgonomonadaceae.Proteiniphilum.Proteiniphilum_saccharofermentans	2.96997			-
Bacteria.Proteobacteria.Gammaproteobacteria.Cardiobacteriales.Cardiobacteriaceae.Cardiobacterium	2.26926			-
Bacteria.Firmicutes_D.Bacilli.Erysipelotrichales.Coprobacillaceae	1.79897			-
Bacteria.Firmicutes_A.Clostridia.Peptostreptococcales.Peptostreptococcaceae.Romboutsia_B	0.24027			-
Bacteria.Bacteroidota.Bacteroidia.Bacteroidales.UBA11471	0.592226			-
Bacteria.Firmicutes_D.Bacilli.Erysipelotrichales.Erysipelotrichaceae.Bulleidia	3.8572			-
Bacteria.Desulfobacterota_B.Binatia.Bin18.Bin18.JABFSC01	2.46922			-
Bacteria.Firmicutes_A.Clostridia.Lachnospirales.Lachnospiraceae.Merdisoma.Merdisoma_sp011959465	2.05222			-
Bacteria.Bacteroidota.Bacteroidia.Flavobacteriales	4.26459			-
Bacteria.Bacteroidota.Bacteroidia.Bacteroidales.Muribaculaceae.CAG_485	3.20215	AC	3.30774	0.0262555185078
Bacteria.Bacteroidota.Bacteroidia.Bacteroidales.Bacteroidaceae.Bacteroides_H.Bacteroides_H_thetaiotaomicron	0.45143			-
Bacteria.Proteobacteria.Gammaproteobacteria.Pseudomonadales.Cellvibrionaceae	3.06773			-
Bacteria.Proteobacteria.Gammaproteobacteria.Enterobacterales_A.Pasteurellaceae.Actinobacillus_C	0.25507			-
Bacteria.Firmicutes_A.Clostridia.Tissierellales.Peptoniphilaceae.W5053	2.46043			-
Bacteria.Spirochaetota.Leptospirae	1.90056			-
Bacteria.Desulfobacterota_I.Syntrophobacteria.Syntrophobacterales.Syntrophobacteraceae.Syntrophobacterium	0			-
Bacteria.Firmicutes_D.Bacilli.Lactobacillales.Lactobacillaceae.Lactobacillus.Lactobacillus_gasseri	1.27203			-
Bacteria.Firmicutes_A.Clostridia.Oscillospirales.Acutalibacteraceae.UBA737	3.48081			-
Bacteria.Firmicutes_A.Clostridia.TANB77.CAG_508.CAG_273	3.0604			-
Bacteria.Actinobacteriota.Actinomycetia.Actinomycetales.Actinomycetaceae.Actinomyces.Actinomyces_graevenitzii	3.70776			-
Bacteria.Spirochaetota.Spirochaetia.Treponematales.Treponemataceae.Treponema_B	2.32315			-
Bacteria.Cyanobacteria.Sericytochromatia.UBA7694.UBA7694.GCA_2770975	0			-
Bacteria.Firmicutes_C.Negativicutes.Veillonellales.Dialisteraceae.Allisonella.Allisonella_pneumosintes	3.89066	AC	3.52296	0.00539608251197
Bacteria.Firmicutes_A.Clostridia.Peptostreptococcales.Anaerovoracaceae.Mogibacterium.Mogibacterium_pumilum	1.74729			-
Bacteria.Actinobacteriota.Acidimicrobiia.UBA5794	0			-
Bacteria.Firmicutes_A.Clostridia.Peptostreptococcales.Anaerovoracaceae.Mogibacterium	3.68527			-
Bacteria.Proteobacteria.Alphaproteobacteria.Rhizobiales_A.Methyloligellaceae	2.71664			-
Bacteria.Proteobacteria.Gammaproteobacteria.Enterobacterales_A.Pasteurellaceae.Haemophilus_D.Haemophilus_D_734546_aegyptius	1.44647			-
Bacteria.Proteobacteria.Alphaproteobacteria.Sphingomonadales	3.93091			-
Bacteria.Bacteroidota.Bacteroidia.Bacteroidales.Dysgonomonadaceae	2.96997			-
Bacteria.Actinobacteriota.Actinomycetia.Streptosporangiales	0.901083			-
Bacteria.Firmicutes_D.Bacilli.Erysipelotrichales.Erysipelotrichaceae.Ileibacterium	2.67577			-
Bacteria.Actinobacteriota.Actinomycetia.Mycobacteriales.Mycobacteriaceae.Mycobacterium	2.93823			-
Bacteria.Cyanobacteria.Cyanobacteriia.Cyanobacteriales.Coleofasciculaceae	1.97451			-
Bacteria.Firmicutes_D.Bacilli.Staphylococcales.Gemellaceae.Gemella.Gemella_morbillorum	4.2032	AC	3.92611	0.000984164579371
Bacteria.Bacteroidota.Bacteroidia.Bacteroidales.Bacteroidaceae.Phocaeicola_A.Phocaeicola_A_858004_vulgatus	1.21499	NC	3.23022	0.0322287762077
Bacteria.Firmicutes_D.Bacilli.Mycoplasmatales.Metamycoplasmataceae.Metamycoplasma	1.42713			-
Bacteria.Firmicutes_A.Clostridia.Lachnospirales.Lachnospiraceae.Fimousia	0.12478			-
Bacteria.Proteobacteria.Alphaproteobacteria.Sphingomonadales.Sphingomonadaceae.Novosphingobium	2.90768			-
Bacteria.Actinobacteriota.Thermoleophilia.Solirubrobacterales	3.43913			-
Bacteria.Bacteroidota.Bacteroidia.Bacteroidales.Bacteroidaceae.Prevotella.Prevotella_histicola	3.27606			-
Bacteria.Firmicutes_D.Bacilli.Staphylococcales	4.66213			-
Bacteria.Patescibacteria.Paceibacteria.UBA9983_A.UBA2103.C7867_001	1.76223			-
Bacteria.Actinobacteriota.Acidimicrobiia.Acidimicrobiales	2.80768			-
Bacteria.Firmicutes_D.Bacilli.Lactobacillales.Enterococcaceae	1.54878			-
Bacteria.Firmicutes_A.Clostridia.Peptostreptococcales.Anaerovoracaceae	4.15397			-
Bacteria.Firmicutes_A.Clostridia.Peptostreptococcales.Anaerovoracaceae.Eubacterium_M	3.27529			-
Bacteria.Deinococcota.Deinococci.Deinococcales.Trueperaceae.Truepera	1.5119			-
Bacteria.Proteobacteria.Gammaproteobacteria.Xanthomonadales.Xanthomonadaceae.Thermomonas.Thermomonas_carbonis	0.226422			-
Bacteria.Eisenbacteria	0.420563			-
Bacteria.Actinobacteriota.Actinomycetia.Actinomycetales.Micrococcaceae.Rothia.Rothia_sp001808955	4.67761			-
Bacteria.Proteobacteria.Gammaproteobacteria.Cardiobacteriales.Cardiobacteriaceae	2.26926			-
Bacteria.Firmicutes_A.Clostridia.Christensenellales.CAG_917.CAG_475	1.09901			-
Bacteria.Actinobacteriota.Actinomycetia.Mycobacteriales.Mycobacteriaceae.Corynebacterium.Corynebacterium_matruchotii	2.97628			-
Bacteria.Chloroflexota.Limnocylindria.QHBO01.QHBO01.CF_167.CF_167_sp005879775	1.47207			-
Bacteria.Actinobacteriota.Actinomycetia.Actinomycetales	5.14125	NC	4.49653	0.0115079999444
Bacteria.Bacteroidota.Bacteroidia.Bacteroidales.Tannerellaceae.Tannerella	2.52903			-
Bacteria.Firmicutes_C.Negativicutes.Veillonellales.Veillonellaceae.Veillonella_A.Veillonella_A_tobetsuensis	1.87613			-
Bacteria.Firmicutes_D.Bacilli.Lactobacillales.Lactobacillaceae.Lactobacillus	3.29653			-
Bacteria.Fusobacteriota.Fusobacteriia.Fusobacteriales.Leptotrichiaceae.Leptotrichia_A.Leptotrichia_A_993758_hofstadii	3.3768	NC	3.2318	0.0181042054621
Bacteria.Bacteroidota.Bacteroidia.Flavobacteriales.Weeksellaceae.Chryseobacterium	2.31698			-
Bacteria.Firmicutes_C.Negativicutes.Selenomonadales.Selenomonadaceae.Centipeda.Centipeda_noxia	2.34648			-
Bacteria.Bacteroidota.Bacteroidia.Bacteroidales.Tannerellaceae.Parabacteroides_B.Parabacteroides_B_862066_faecis	0.0655015			-
Bacteria.Actinobacteriota.Actinomycetia.Actinomycetales.Actinomycetaceae.Pauljensenia.Pauljensenia_pyogenes_A	0.852508	AC	3.96976	0.0132796383483
Bacteria.Firmicutes_D.Bacilli.RF39.UBA660.CAG_710	3.19629			-
Bacteria.Bacteroidota.Bacteroidia.Cytophagales.Cyclobacteriaceae.ELB16_189	2.76995			-
Bacteria.Firmicutes_A.Clostridia.Christensenellales.CAG_74.Onthenecus.Onthenecus_sp900199405	0.197316			-
Bacteria.Proteobacteria.Gammaproteobacteria.Cardiobacteriales.Cardiobacteriaceae.Cardiobacterium.Cardiobacterium_hominis	2.19839			-
Bacteria.Fusobacteriota.Fusobacteriia.Fusobacteriales.Leptotrichiaceae.Leptotrichia_A.Leptotrichia_A_993758_buccalis	3.01115			-
Bacteria.Proteobacteria.Gammaproteobacteria.Burkholderiales.Casimicrobiaceae.VBCG01	0.166569			-
Bacteria.Acidobacteriota.Blastocatellia.Pyrinomonadales	0.203051			-
Bacteria.Firmicutes_A.Clostridia.Lachnospirales.Lachnospiraceae.Butyrivibrio_A.Butyrivibrio_A_168226_sp900104155	0.437983			-
Bacteria.Actinobacteriota.Actinomycetia.Propionibacteriales.Propionibacteriaceae.Cutibacterium.Cutibacterium_modestum	1.33781			-
Bacteria.Fibrobacterota.Fibrobacteria.Fibrobacterales.Fibrobacteraceae	0.0212241963316			-
Bacteria.Proteobacteria.Gammaproteobacteria.Enterobacterales_A.Pasteurellaceae	4.83269			-
Bacteria.Firmicutes_D.Bacilli.Erysipelotrichales.Coprobacillaceae.Erysipelatoclostridium.Clostridium_cocleatum	0.0141817703732			-
Bacteria.Proteobacteria.Gammaproteobacteria.Burkholderiales.Burkholderiaceae_A.Pelomonas	2.34425			-
Bacteria.Cyanobacteria.Vampirovibrionia.Gastranaerophilales.Gastranaerophilaceae	2.71141			-
Bacteria.Firmicutes_A.Clostridia.Eubacteriales.Oscillospiraceae.Ructibacterium	0.00150385224564			-
Bacteria.Firmicutes_A.Clostridia.Lachnospirales.Lachnospiraceae.Eubacterium_G	3.55615	AC	3.58785	0.0279188173181
Bacteria.Acidobacteriota.Thermoanaerobaculia.UBA5704.UBA5704.JACTMI01	0.185709			-
Bacteria.Chloroflexota.Chloroflexia.Chloroflexales.Roseiflexaceae	0			-
Bacteria.Firmicutes_D.Bacilli.Bacillales_B.Anoxybacillaceae.Geobacillus.Geobacillus_thermodenitrificans	3.47703			-
Bacteria.Actinobacteriota.Actinomycetia.Propionibacteriales.Propionibacteriaceae.Arachnia	1.44787			-
Bacteria.Actinobacteriota.Acidimicrobiia.Acidimicrobiales.Microtrichaceae.IMCC26207.IMCC26207_sp001025035	2.15956			-
Bacteria.Thermosulfidibacterota	2.95446			-
Bacteria.Actinobacteriota.Actinomycetia.Actinomycetales.Cellulomonadaceae.Actinotalea	0.0205717932115			-
Bacteria.Firmicutes_A.Clostridia.Lachnospirales.Lachnospiraceae.Eubacterium_J	0.165419			-
Bacteria.Proteobacteria.Gammaproteobacteria.Burkholderiales.Burkholderiaceae_A.Cupriavidus	2.70478			-
Bacteria.Bacteroidota.Bacteroidia.Bacteroidales.Muribaculaceae.UBA7173.UBA7173_sp004102805	2.16241			-
Bacteria.Spirochaetota.Spirochaetia.Sphaerochaetales.Sphaerochaetaceae	0.0289952729563			-
Bacteria.Firmicutes_D.Bacilli.Lactobacillales.Aerococcaceae.Abiotrophia	2.96913			-
Bacteria.Proteobacteria.Gammaproteobacteria.Burkholderiales.Burkholderiaceae_A.Cupriavidus.Cupriavidus_agavae	2.70478			-
Bacteria.Bacteroidota.Bacteroidia.Bacteroidales.Bacteroidaceae.Prevotella.Prevotella_fusca	1.48512			-
Bacteria.Proteobacteria.Alphaproteobacteria.Micavibrionales.Micavibrionaceae	0			-
Bacteria.Proteobacteria.Gammaproteobacteria.Burkholderiales.Rhodocyclaceae	3.83462			-
Bacteria.Firmicutes_D.Bacilli.Lactobacillales.Streptococcaceae.Streptococcus.Streptococcus_gordonii	3.11468			-
Bacteria.Cyanobacteria.Vampirovibrionia.Gastranaerophilales.Gastranaerophilaceae.CAG_196.CAG_196_sp002102975	2.29339			-
Bacteria.Verrucomicrobiota.Verrucomicrobiae.Methylacidiphilales.JAAUTS01	1.8072			-
Bacteria.Eisenbacteria.RBG_16_71_46.SZUA_252.SZUA_252	0.233397			-
Bacteria.Firmicutes_C.Negativicutes.Selenomonadales.Selenomonadaceae.Mitsuokella	2.23361			-
Bacteria.Firmicutes_C.Negativicutes.Selenomonadales.Selenomonadaceae	3.66907			-
Bacteria.Firmicutes_A.Clostridia.Christensenellales.CAG_314.CAG_314.CAG_314_sp900551395	0.35181			-
Bacteria.Firmicutes_A.Clostridia.Christensenellales.CAG_74	0.197316			-
Bacteria.Proteobacteria.Gammaproteobacteria.Pseudomonadales.Pseudomonadaceae.Pseudomonas_E.Pseudomonas_E_647464_veronii	4.23937			-
Bacteria.Actinobacteriota.Coriobacteriia.Coriobacteriales.Eggerthellaceae.Adlercreutzia	2.50225			-
Bacteria.Firmicutes_A.Clostridia.Lachnospirales.Lachnospiraceae.Eubacterium_F.Eubacterium_F_sp000687695	2.2347			-
Bacteria.Verrucomicrobiota.Verrucomicrobiae.Verrucomicrobiales.Akkermansiaceae.Akkermansia.Akkermansia_muciniphila_D	2.97707			-
Bacteria.Firmicutes_B.Peptococcia.Peptococcales	2.89745			-
Bacteria.Firmicutes_C.Negativicutes.Selenomonadales.Selenomonadaceae.Mitsuokella.Mitsuokella_sp000469545	2.23361			-
Bacteria.Fibrobacterota	0.0212241963316			-
Bacteria.Bacteroidota.Bacteroidia.Bacteroidales.Muribaculaceae.Muribaculum.Muribaculum_gordoncarteri	0.878414			-
Bacteria.Proteobacteria.Gammaproteobacteria.Xanthomonadales.Xanthomonadaceae.Pseudoxanthomonas_A.Pseudoxanthomonas_A_615336_taiwanensis	1.01592	NC	3.23075	0.0322287762077
Bacteria.Gemmatimonadota.Gemmatimonadetes.Gemmatimonadales	0.525597			-
Bacteria.Firmicutes_C.Negativicutes.Selenomonadales.Selenomonadaceae.Selenomonas_B	3.13955			-
Bacteria.Bacteroidota.Bacteroidia.Bacteroidales.Bacteroidaceae.Prevotella.Prevotella_sp902776665	2.13949			-
Bacteria.Firmicutes_A.Clostridia.TANB77.CAG_508.CAG_793.CAG_793_sp000433915	3.15539			-
Bacteria.Proteobacteria.Gammaproteobacteria.Burkholderiales.Burkholderiaceae_A.Pelomonas.Pelomonas_puraquae	2.34081			-
Bacteria.Patescibacteria.Paceibacteria	1.78195			-
Bacteria.Firmicutes_B.Peptococcia.Peptococcales.Peptococcaceae.Peptococcus.Peptococcus_niger	2.70054			-
Bacteria.Proteobacteria.Alphaproteobacteria.Sphingomonadales.Sphingomonadaceae.Sphingorhabdus_B	0.0402189990508			-
Bacteria.Proteobacteria.Gammaproteobacteria.Methylococcales.Methylococcaceae.UBA6136	0			-
Bacteria.Patescibacteria.JAEDAM01.BD1_5.UBA2023	2.03948			-
Bacteria.Firmicutes_D.Bacilli.Lactobacillales.Carnobacteriaceae.Atopostipes	3.59114			-
Bacteria.Eisenbacteria.RBG_16_71_46	0.420563			-
Bacteria.Patescibacteria.Saccharimonadia.Saccharimonadales.Nanosyncoccaceae.Nanosyncoccus.Nanosyncoccus_sp007845165	3.12524			-
Bacteria.Firmicutes_A.Clostridia.Oscillospirales.Acutalibacteraceae.Eubacterium_R.Eubacterium_R_sp000436835	0.216309			-
Bacteria.Actinobacteriota.Actinomycetia.Actinomycetales.Micrococcaceae	4.76561			-
Bacteria.Proteobacteria.Alphaproteobacteria.Caulobacterales.Caulobacteraceae.Brevundimonas	3.81003			-
Bacteria.Actinobacteriota.Thermoleophilia.Gaiellales.Gaiellaceae.GMQP_bins7	2.51472			-
Bacteria.Actinobacteriota.Actinomycetia.Actinomycetales.Actinomycetaceae.Flaviflexus	2.26435			-
Bacteria.Actinobacteriota.Actinomycetia.Actinomycetales.Actinomycetaceae.Peptidiphaga.Peptidiphaga_sp000466165	3.25271			-
Bacteria.Bacteroidota.Bacteroidia.Bacteroidales.Paludibacteraceae.F0058	2.11882			-
Bacteria.Patescibacteria.Saccharimonadia.Saccharimonadales.Nanoperiomorbaceae	1.70076			-
Bacteria.Firmicutes_A.Clostridia.Oscillospirales.Acutalibacteraceae.Fimenecus	0.740812			-
Bacteria.Firmicutes_A.Clostridia.Lachnospirales.Anaerotignaceae.Anaerotignum	0.532963			-
Bacteria.Firmicutes_A.Clostridia.Peptostreptococcales.Anaerovoracaceae.Mogibacterium.Mogibacterium_diversum	3.67518			-
Bacteria.Firmicutes_D.Bacilli.Staphylococcales.Gemellaceae.Gemella.Gemella_palaticanis	0.358335			-
Bacteria.Firmicutes_A.Clostridia.Oscillospirales.Oscillospiraceae.Evtepia	0			-
Bacteria.Actinobacteriota.Coriobacteriia.Coriobacteriales.Atopobiaceae.Olegusella	3.21234			-
Bacteria.Actinobacteriota.Thermoleophilia.UBA2241	2.2069			-
Bacteria.Proteobacteria.Gammaproteobacteria.Enterobacterales_A.Enterobacteriaceae_A.Proteus	1.03733			-
Bacteria.Fusobacteriota.Fusobacteriia.Fusobacteriales.Leptotrichiaceae	4.21742			-
Bacteria.Firmicutes_D.Bacilli.Erysipelotrichales.Erysipelotrichaceae.Allobaculum	2.37314			-
Bacteria.Proteobacteria.Gammaproteobacteria.GCA_2729495.GCA_2729495.GCA_002729875.GCA_002729875_sp002688175	0			-
Bacteria.Bacteroidota.Bacteroidia.Bacteroidales.Bacteroidaceae.Bacteroides_H.Bacteroides_H_rodentium	2.60895			-
Bacteria.Fusobacteriota.Fusobacteriia.Fusobacteriales.Leptotrichiaceae.Caviibacter.Caviibacter_abscessus	2.64416			-
Bacteria.Firmicutes_D.Bacilli.Lactobacillales.Enterococcaceae.Enterococcus_E.Enterococcus_E_cecorum	0			-
Bacteria.Proteobacteria.Gammaproteobacteria.Burkholderiales.Burkholderiaceae_A.Alcaligenes.Alcaligenes_faecalis	2.18685			-
Bacteria.Bacteroidota.Bacteroidia.Bacteroidales.Muribaculaceae.Duncaniella.Duncaniella_sp001689575	2.53532			-
Bacteria.Firmicutes_D.Bacilli.Lactobacillales.Lactobacillaceae.Lactobacillus.Lactobacillus_gallinarum	0.431142			-
Bacteria.Chloroflexota.Limnocylindria.Limnocylindrales.CSP1_4.GWC2_73_18	2.73471			-
Bacteria.Proteobacteria.Gammaproteobacteria.Burkholderiales.Burkholderiaceae_A.Variovorax.Variovorax_paradoxus_C	0.22164			-
Bacteria.Actinobacteriota.Actinomycetia.Streptosporangiales.Streptosporangiaceae.Thermobifida	0.901083			-
Bacteria.Acidobacteriota.Acidobacteriae.Acidobacteriales.SbA1.Sulfotelmatobacter	3.23449			-
Bacteria.Firmicutes_A.Clostridia.Eubacteriales.Oscillospiraceae	0.00150385224564			-
Bacteria.Bacteroidota.Bacteroidia.Sphingobacteriales	0.759809			-
Bacteria.Proteobacteria.Gammaproteobacteria.Pseudomonadales.Moraxellaceae.Acinetobacter.Acinetobacter_junii	2.03903			-
Bacteria.Firmicutes_A.Clostridia.Christensenellales.CAG_314	1.42782			-
Bacteria.Desulfobacterota_I.Desulfovibrionia.Desulfovibrionales.Desulfovibrionaceae.Mailhella	0.638055			-
Bacteria.Spirochaetota.Leptospirae.Turneriellales	1.90056			-
Bacteria.Cyanobacteria.Cyanobacteriia.Phormidesmiales.Phormidesmiaceae.Nodosilinea.Nodosilinea_sp000763385	0.248671			-
Bacteria.Proteobacteria.Gammaproteobacteria.Enterobacterales_A.Enterobacteriaceae_A.Pluralibacter	3.05615			-
Bacteria.Bacteroidota.Bacteroidia.Flavobacteriales.Weeksellaceae	4.1788			-
Bacteria.Proteobacteria.Gammaproteobacteria.Burkholderiales.Burkholderiaceae_A.Comamonas_F.Comamonas_F_589250_tsuruhatensis	1.90429			-
Bacteria.Actinobacteriota.Actinomycetia.Mycobacteriales.Mycobacteriaceae.Rhodococcus_B	3.58964			-
Bacteria.Proteobacteria.Gammaproteobacteria.Burkholderiales.Burkholderiaceae_A.Turicimonas.Turicimonas_muris	0.229317			-
Bacteria.Firmicutes_A.Clostridia.Peptostreptococcales.Filifactoraceae.Peptoanaerobacter.Peptoanaerobacter_margaretiae	0.639097			-
Bacteria.Patescibacteria.JAEDAM01	3.32565			-
Bacteria.Desulfobacterota_B.Binatia.Bin18	2.46922			-
Bacteria.Chloroflexota.Anaerolineae.Anaerolineales.EnvOPS12	2.31373			-
Bacteria.Proteobacteria.Gammaproteobacteria.Burkholderiales.Burkholderiaceae_A.Comamonas_F	3.82329			-
Bacteria.Firmicutes_D.Bacilli.Lactobacillales.Lactobacillaceae.Lactobacillus.Lactobacillus_intestinalis	2.47988			-
Bacteria.Bacteroidota.Bacteroidia.Flavobacteriales.Weeksellaceae.Kaistella.Kaistella_jeonii	0.85993			-
Bacteria.Patescibacteria.Saccharimonadia.Saccharimonadales.Nanogingivalaceae.Nanogingivalis	2.28432			-
Bacteria.Acidobacteriota.Acidobacteriae.Acidobacteriales	3.23449			-
Bacteria.Bacteroidota.Bacteroidia.Bacteroidales.Muribaculaceae.UBA7173	2.74174			-
Bacteria.Bacteroidota.Bacteroidia.Flavobacteriales.Weeksellaceae.Chryseobacterium.Chryseobacterium_gambrini	2.31511			-
Bacteria.Firmicutes_A.Clostridia.Lachnospirales.Lachnospiraceae.Mediterraneibacter_A.Mediterraneibacter_A_155507_cottocaccae	0.734344			-
Bacteria.Firmicutes_C.Negativicutes.Veillonellales.Dialisteraceae.Dialister.Dialister_hominis	0			-
Bacteria.Firmicutes_D.Bacilli.Lactobacillales.Lactobacillaceae.Ligilactobacillus.Ligilactobacillus_agilis	1.50802			-
Bacteria.Proteobacteria.Gammaproteobacteria.Enterobacterales_A.Pasteurellaceae.Haemophilus_A.Haemophilus_A_sputorum	2.37907			-
Bacteria.Bacteroidota.Bacteroidia.Bacteroidales.Rikenellaceae	1.6597			-
Bacteria.Firmicutes_A.Clostridia.Clostridiales.Clostridiaceae.Clostridium_T	2.45611			-
Bacteria.Firmicutes_A.Clostridia.Lachnospirales.Lachnospiraceae.F0428	2.93084			-
Bacteria.Proteobacteria.Gammaproteobacteria.Lysobacterales	0			-
Bacteria.Fibrobacterota.Fibrobacteria	0.0212241963316			-
Bacteria.Firmicutes_A.Clostridia.Christensenellales.Borkfalkiaceae	0			-
Bacteria.Patescibacteria.Saccharimonadia.Saccharimonadales.Nanogingivalaceae	2.28432			-
Bacteria.Firmicutes_A.Clostridia.Lachnospirales.Lachnospiraceae.Catonella.Catonella_morbi	3.43931			-
Bacteria.Proteobacteria.Gammaproteobacteria.Burkholderiales.Burkholderiaceae_A.Ralstonia	4.16228			-
Bacteria.Firmicutes_D.Bacilli.Lactobacillales.Streptococcaceae.Streptococcus.Streptococcus_constellatus	3.2876			-
Bacteria.Actinobacteriota.Actinomycetia.Actinomycetales.Micrococcaceae.Micrococcus.Micrococcus_antarcticus	0			-
Bacteria.Fusobacteriota.Fusobacteriia.Fusobacteriales.Fusobacteriaceae.Fusobacterium_C.Fusobacterium_C_canifelinum	1.07956			-
Bacteria.Firmicutes_C.Negativicutes.Selenomonadales.Selenomonadaceae.Centipeda.Centipeda_periodontii	3.45316			-
Bacteria.Actinobacteriota.Actinomycetia.Propionibacteriales.Propionibacteriaceae.Cutibacterium.Cutibacterium_namnetense	2.08193			-
Bacteria.Desulfobacterota_I.Syntrophobacteria.Syntrophobacterales	2.22131			-
Bacteria.Firmicutes_A.Clostridia.Clostridiales.Clostridiaceae.Clostridium_B	2.99626			-
Bacteria.Firmicutes_B.Desulfotomaculia	0.730353			-
Bacteria.Desulfobacterota_B	2.46922			-
Bacteria.Firmicutes_D.Bacilli.Lactobacillales.Lactobacillaceae.Lacticaseibacillus.Lacticaseibacillus_paracasei	2.90604			-
Bacteria.Patescibacteria.JAEDAM01.Absconditabacterales.X112.HOT_345	3.24167			-
Bacteria.Firmicutes_A.Clostridia.Eubacteriales	0.573445			-
Bacteria.Firmicutes_D.Bacilli.Lactobacillales.Streptococcaceae.Streptococcus.Streptococcus_sinensis	2.77918	AC	2.61337	0.0301768072488
Bacteria.Firmicutes_D.Bacilli.Erysipelotrichales.Erysipelotrichaceae.Dubosiella.Dubosiella_sp000403415	3.44687			-
Bacteria.Firmicutes_A.Clostridia.Christensenellales.GCA_900066905.GCA_900066905	0			-
Bacteria.Firmicutes_A.Clostridia.Christensenellales.UBA1242	0.0950297966485			-
Bacteria.Firmicutes_C.Negativicutes.Veillonellales.Veillonellaceae.F0422	1.72649			-
Bacteria.Proteobacteria.Gammaproteobacteria.Cardiobacteriales.Cardiobacteriaceae.Cardiobacterium.Cardiobacterium_valvarum	1.44696			-
Bacteria.Synergistota.Synergistia.Synergistales.Aminobacteriaceae.CAJPSE01.CAJPSE01_sp003860125	1.65641			-
Bacteria.Desulfobacterota_I.Desulfovibrionia.Desulfovibrionales.Desulfovibrionaceae.Mailhella.Mailhella_massiliensis	0.638055			-
Bacteria.Thermotogota.Thermotogae.Petrotogales.Petrotogaceae.Defluviitoga.Defluviitoga_tunisiensis	0.558251			-
Bacteria.Planctomycetota.Phycisphaerae	0.281001			-
Bacteria.Fusobacteriota.Fusobacteriia.Fusobacteriales.Leptotrichiaceae.Leptotrichia_A.Leptotrichia_A_993758_wadei	3.79232	NC	3.35765	0.00920350434478
Bacteria.Thermotogota.Thermotogae.Petrotogales.Petrotogaceae	0.558251			-
Bacteria.Patescibacteria.JAEDAM01.Absconditabacterales	3.24167			-
Bacteria.Firmicutes_D.Bacilli.Lactobacillales.Lactobacillaceae.Ligilactobacillus.Ligilactobacillus_salivarius	0.840211			-
Bacteria.Proteobacteria.Gammaproteobacteria.Burkholderiales.Burkholderiaceae_A.Lautropia.Lautropia_mirabilis	3.57957			-
Bacteria.Patescibacteria.Saccharimonadia.Saccharimonadales.Saccharimonadaceae.SZUA_359.SZUA_359_sp003246575	0.584285			-
Bacteria.Proteobacteria.Gammaproteobacteria.Burkholderiales.Burkholderiaceae_A.Pseudoduganella.Pseudoduganella_eburnea	0			-
Bacteria.Firmicutes_A.Clostridia.UBA1381.UBA1381.CAG_41.CAG_41_sp001941225	0.282369			-
Bacteria.Firmicutes_A.Clostridia.Christensenellales.CAG_552.WRAY01.WRAY01_sp009787685	0			-
Bacteria.Firmicutes_D.Bacilli.Lactobacillales.Streptococcaceae.Streptococcus	5.47163			-
Bacteria.Firmicutes_D.Bacilli.Bacillales_B.DSM_18226.Bacillus_Z	1.99341			-
Bacteria.Firmicutes_D.Bacilli.Lactobacillales.Streptococcaceae.Streptococcus.Streptococcus_cristatus_B	1.57153			-
Bacteria.Firmicutes_D.Bacilli.RF39.UBA660.UBA6985	1.54262			-
Bacteria.Firmicutes_A.Clostridia.Lachnospirales.Lachnospiraceae.Choladousia.Choladousia_sp003612585	0.521594			-
Bacteria.Firmicutes_D.Bacilli.Acholeplasmatales.UBA5453.Acholeplasma_E	1.88983			-
Bacteria.Spirochaetota.Spirochaetia.Treponematales.Treponemataceae.Treponema_D.Treponema_D_amylovorum	1.59809			-
Bacteria.Acidobacteriota.Vicinamibacteria.Vicinamibacterales.Vicinamibacteraceae	0.0781127812587			-
Bacteria.Bacteroidota.Bacteroidia.Flavobacteriales.Flavobacteriaceae.Capnocytophaga.Capnocytophaga_endodontalis	1.75066			-
Bacteria.Proteobacteria.Gammaproteobacteria.Burkholderiales.Burkholderiaceae_A.Herbaspirillum.Herbaspirillum_huttiense	2.59023			-
Bacteria.Firmicutes_A.Clostridia.Lachnospirales.Lachnospiraceae.C_53	1.63129			-
Bacteria.Actinobacteriota.Actinomycetia.Propionibacteriales.Propionibacteriaceae.Cutibacterium.Cutibacterium_acnes	3.04786			-
Bacteria.Actinobacteriota.Coriobacteriia	4.10574			-
Bacteria.Campylobacterota.Campylobacteria.Campylobacterales.Helicobacteraceae.Helicobacter_E.Helicobacter_E_pylori_CI	2.94917			-
Bacteria.Firmicutes_D.Bacilli.Lactobacillales.Aerococcaceae.Granulicatella	4.18658	NC	3.73719	0.0489075900349
Bacteria.Campylobacterota.Campylobacteria.Campylobacterales.Helicobacteraceae.Helicobacter_D	2.62358			-
Bacteria.Campylobacterota.Campylobacteria.Campylobacterales.Helicobacteraceae.Helicobacter_E	2.9498			-
Bacteria.Chloroflexota.Chloroflexia.Chloroflexales	0			-
Bacteria.Firmicutes_A.Clostridia.Peptostreptococcales.Anaerovoracaceae.Hornefia	3.37642			-
Bacteria.Firmicutes_D.Bacilli.Erysipelotrichales	4.01696			-
Bacteria.Firmicutes_A.Clostridia.Lachnospirales.Lachnospiraceae.Kineothrix	2.96145			-
Bacteria.Spirochaetota.Spirochaetia.Treponematales.Treponemataceae.Treponema_B.Treponema_B_986141_denticola	2.00919			-
Bacteria.Proteobacteria.Gammaproteobacteria.Enterobacterales_A.Pasteurellaceae.Haemophilus_D.Haemophilus_D_735815_parainfluenzae_K	3.42767			-
Bacteria.Actinobacteriota.Actinomycetia.Propionibacteriales.Propionibacteriaceae.Cutibacterium	3.11685			-
Bacteria.Bacteroidota.Bacteroidia.Bacteroidales.Muribaculaceae.Paramuribaculum.Paramuribaculum_intestinale	2.02316			-
Bacteria.Firmicutes_A.Clostridia.Lachnospirales.Lachnospiraceae.Oribacterium.Oribacterium_asaccharolyticum	2.85121			-
Bacteria.Proteobacteria.Gammaproteobacteria.Burkholderiales.Usitatibacteraceae	0.842263			-
Bacteria.Actinobacteriota.Acidimicrobiia.UBA5794.UBA5794	0			-
Bacteria.Myxococcota_A.UBA9160.UBA9160.PR03	2.10233			-
Bacteria.Proteobacteria.Gammaproteobacteria.Lysobacterales.Lysobacteraceae.Pseudomarimonas.Pseudomarimonas_arenosa	0			-
Bacteria.Firmicutes_D.Bacilli.Bacillales_B.Bacillaceae_H	0.354256			-
Bacteria.Firmicutes_A.Clostridia.Oscillospirales.Ruminococcaceae.Fournierella	2.3821			-
Bacteria.Patescibacteria.Saccharimonadia.Saccharimonadales.Saccharimonadaceae.Saccharimonas.Saccharimonas_aalborgensis	2.6427			-
Bacteria.Armatimonadota.Fimbriimonadia.Fimbriimonadales.Fimbriimonadaceae.55_13.55_13_sp001898035	0			-
Bacteria.Actinobacteriota.Actinomycetia.Streptomycetales	2.02385	NC	2.53801	0.00307038594066
Bacteria.Proteobacteria.Alphaproteobacteria.Sphingomonadales.Sphingomonadaceae.Sphingobium_A.Sphingobium_A_485959_yanoikuyae	2.07323			-
Bacteria.Firmicutes_D.Bacilli.Bacillales_B.Bacillaceae_G	1.47754	NC	3.03177	0.0322287762077
Bacteria.Firmicutes_A.Clostridia.Oscillospirales.Butyricicoccaceae.Agathobaculum.Agathobaculum_sp900291975	0.160121			-
Bacteria.Cyanobacteria.Cyanobacteriia.Phormidesmiales	0.248671			-
Bacteria.Actinobacteriota.Actinomycetia.Actinomycetales.Actinomycetaceae.Actinomyces.Actinomyces_massiliensis	2.77048			-
Bacteria.Spirochaetota.Leptospirae.Turneriellales.Turneriellaceae	1.90056			-
Bacteria.Firmicutes_A.Clostridia.Lachnospirales.Lachnospiraceae.Howardella	0.790166			-
Bacteria.Actinobacteriota.Actinomycetia.Actinomycetales.Micrococcaceae.Rothia.Rothia_aeria	3.75619			-
Bacteria.Firmicutes_D.Bacilli.Acholeplasmatales	2.02673			-
Bacteria.Actinobacteriota.Actinomycetia.Actinomycetales.Actinomycetaceae.Flaviflexus.Flaviflexus_ciconiae	0.443489			-
Bacteria.Firmicutes_A.Clostridia.Lachnospirales.Lachnospiraceae.Kineothrix.Kineothrix_sp000403275	2.96145			-
Bacteria.Fusobacteriota.Fusobacteriia.Fusobacteriales.Leptotrichiaceae.Leptotrichia_A	4.20296			-
Bacteria.Firmicutes_A.Clostridia.Lachnospirales.Lachnospiraceae.CAG_95	0.529496			-
Bacteria.Actinobacteriota.Thermoleophilia.Solirubrobacterales.70_9	2.15608			-
Bacteria.Firmicutes_A.Clostridia.Lachnospirales.Lachnospiraceae.Eubacterium_G.Eubacterium_G_sp000434315	3.26401			-
Bacteria.Firmicutes_A.Clostridia.Oscillospirales.Acutalibacteraceae.Eubacterium_R.Eubacterium_R_sp011958665	0.240397			-
Bacteria.Proteobacteria.Gammaproteobacteria.Xanthomonadales.Xanthomonadaceae.Stenotrophomonas_A	2.89601			-
Bacteria.Bacteroidota.Bacteroidia.Bacteroidales.Bacteroidaceae.Prevotella.Prevotella_jejuni	2.79675			-
Bacteria.Firmicutes_A.Clostridia.Lachnospirales.Lachnospiraceae.F0428.F0428_sp003043955	2.93084			-
Bacteria.Proteobacteria.Alphaproteobacteria.Acetobacterales.Acetobacteraceae	3.42369			-
Bacteria.Thermotogota.Thermotogae	0.558251			-
Bacteria.Firmicutes_A.Clostridia.Lachnospirales.Lachnospiraceae.CAG_95.CAG_95_sp009917455	0.529496			-
Bacteria.Bacteroidota.Bacteroidia.Bacteroidales.Rikenellaceae.Tidjanibacter.Tidjanibacter_inops_A	0.50878			-
Bacteria.Firmicutes_A.Clostridia.Christensenellales.CAG_138	0.365634			-
Bacteria.Firmicutes_A.Clostridia.Christensenellales.CAG_552.WRAY01	0			-
Bacteria.Firmicutes_A.Clostridia.Lachnospirales.Lachnospiraceae.Schaedlerella	3.31173			-
Bacteria.Firmicutes_D.Bacilli.Acholeplasmatales.UBA5453	1.88983			-
Bacteria.Firmicutes_A.Clostridia.Christensenellales.CAG_138.Aphodomorpha	0.304108			-
Bacteria.Fusobacteriota.Fusobacteriia.Fusobacteriales.Fusobacteriaceae	4.64515	AC	4.14165	0.0443780981014
Bacteria.Proteobacteria.Alphaproteobacteria.Rhizobiales_A.Rhizobiaceae_A	0.892486			-
Bacteria.Bacteroidota.Bacteroidia.Cytophagales.Hymenobacteraceae	2.62145			-
Bacteria.Proteobacteria.Alphaproteobacteria.Sphingomonadales.Sphingomonadaceae.Sphingorhabdus_B.Sphingorhabdus_B_483718_profundilacus	0.0402189990508			-
Bacteria.Proteobacteria.Alphaproteobacteria.Rhizobiales_A.Rhizobiaceae_A.Chelativorans	0.242421			-
Bacteria.Proteobacteria.Gammaproteobacteria.Enterobacterales_A.Pasteurellaceae.Mannheimia	0			-
Bacteria.Firmicutes_A.Clostridia.Lachnospirales.Lachnospiraceae.14_2	0.255109			-
Bacteria.Proteobacteria.Gammaproteobacteria.Pseudomonadales.Pseudomonadaceae.Pseudomonas_E.Pseudomonas_E_647464_edaphica	0			-
Bacteria.Bacteroidota.Bacteroidia.Bacteroidales.Muribaculaceae.Paramuribaculum.Paramuribaculum_sp000431155	2.34311			-
Bacteria.Firmicutes_A.Clostridia.Oscillospirales.Oscillospiraceae.CAG_83.CAG_83_sp900545585	2.92874			-
Bacteria.Synergistota.Synergistia.Synergistales.Aminobacteriaceae.CAJPSE01	1.65641			-
Bacteria.Bacteroidota.Bacteroidia.Bacteroidales.Bacteroidaceae.Prevotella.Prevotella_salivae	3.43398			-
Bacteria.Firmicutes_A.Clostridia.Oscillospirales.Ruminococcaceae.Gemmiger_A.Gemmiger_A_73276_avium	0			-
Bacteria.Bacteroidota.Bacteroidia.Bacteroidales.Muribaculaceae.UBA3263	0.8521			-
Bacteria.Actinobacteriota.Actinomycetia.Actinomycetales.Beutenbergiaceae.Beutenbergia.Beutenbergia_cavernae	0.466959			-
Bacteria.Bacteroidota.Bacteroidia.Bacteroidales.Bacteroidaceae.Prevotella.Prevotella_marshii	1.18031			-
Bacteria.Proteobacteria.Gammaproteobacteria.Xanthomonadales.Xanthomonadaceae.Pseudoxanthomonas_A.Pseudoxanthomonas_A_615337_mexicana_A	0.126138			-
Bacteria.Proteobacteria.Gammaproteobacteria.Enterobacterales_A.Pasteurellaceae.Aggregatibacter.Aggregatibacter_aphrophilus	1.53053			-
Bacteria.Synergistota	1.65641			-
Bacteria.Campylobacterota	3.46141			-
Bacteria.Firmicutes_D.Bacilli.Lactobacillales.Streptococcaceae.Streptococcus.Streptococcus_parasanguinis	3.80493			-
Bacteria.Actinobacteriota.Actinomycetia.Actinomycetales.Bifidobacteriaceae.Alloscardovia.Alloscardovia_omnicolens	1.78041			-
Bacteria.Proteobacteria.Gammaproteobacteria.Burkholderiales.Neisseriaceae.Neisseria.Neisseria_sp000186165	3.20044			-
Bacteria.Proteobacteria.Alphaproteobacteria.Rhizobiales_A.Beijerinckiaceae	4.01077			-
Bacteria.Firmicutes_A.Clostridia.Eubacteriales.Oscillospiraceae.Ructibacterium.Ructibacterium_gallinarum	0.00150385224564			-
Bacteria.Firmicutes_C.Negativicutes.Veillonellales.Veillonellaceae.Veillonella_A.Veillonella_A_rogosae	3.66847			-
Bacteria.Firmicutes_A.Clostridia.Oscillospirales.UBA644	2.05227			-
Bacteria.Firmicutes_D.Bacilli.Haloplasmatales_A	1.66605			-
Bacteria.Actinobacteriota.Actinomycetia.Mycobacteriales.Mycobacteriaceae	4.07934			-
Bacteria.Actinobacteriota.Coriobacteriia.Coriobacteriales.Eggerthellaceae.Slackia_A	2.30458			-
Bacteria.Firmicutes_A.Clostridia.TANB77.CAG_508.CAG_793	3.15627			-
Bacteria.Bacteroidota.Bacteroidia.Bacteroidales.UBA932.Cryptobacteroides	1.50554			-
Bacteria.Patescibacteria.JAEDAM01.BD1_5.UBA6164.JAACSU01	2.41937			-
Bacteria.Proteobacteria.Gammaproteobacteria.Burkholderiales.Neisseriaceae.Eikenella	2.67042			-
Bacteria.Firmicutes_A.Clostridia.Lachnospirales.Lachnospiraceae.Porcincola	2.34084			-
Bacteria.Deinococcota.Deinococci.Deinococcales	3.81784			-
Bacteria.Firmicutes_D.Bacilli.Staphylococcales.Staphylococcaceae	3.91985			-
Bacteria.Actinobacteriota.Actinomycetia.Actinomycetales.Micrococcaceae.Rothia.Rothia_amarae	0.927903			-
Bacteria.Proteobacteria.Gammaproteobacteria.Burkholderiales.Burkholderiaceae_A.NBD_18	3.34052			-
Bacteria.Synergistota.Synergistia.Synergistales.Aminobacteriaceae	1.65641			-
Bacteria.Proteobacteria.Gammaproteobacteria.Burkholderiales.Burkholderiaceae_A.Rubrivivax	0			-
Bacteria.Bacteroidota.Bacteroidia.Flavobacteriales.Flavobacteriaceae	3.77663			-
Bacteria.Proteobacteria.Gammaproteobacteria.Burkholderiales.Burkholderiaceae_A.Paracandidimonas	2.86737			-
Bacteria.Bacteroidota.Bacteroidia.Bacteroidales.Marinilabiliaceae.JC017	2.20601			-
Bacteria.Bacteroidota.Bacteroidia.Bacteroidales.Porphyromonadaceae.Porphyromonas_A.Porphyromonas_A_859423_gulae	0.887167			-
Bacteria.Firmicutes_A.Clostridia.Oscillospirales.Ruminococcaceae.Faecalibacterium	2.09792			-
Bacteria.Firmicutes_D.Bacilli.Lactobacillales.Lactobacillaceae.Ligilactobacillus	4.40746			-
Bacteria.Firmicutes_A.Clostridia.TANB77	3.3843			-
Bacteria.Actinobacteriota.Coriobacteriia.Coriobacteriales.Atopobiaceae.Lancefieldella.Lancefieldella_sp000564995	3.75875			-
Bacteria.Firmicutes_A.Clostridia.Peptostreptococcales.Filifactoraceae.Peptoanaerobacter	3.41894	AC	3.12521	0.000788367250005
Bacteria.Campylobacterota.Campylobacteria.Campylobacterales.Campylobacteraceae.Campylobacter_A	3.27362			-
Bacteria.Proteobacteria.Gammaproteobacteria.Burkholderiales.Burkholderiaceae_A	4.47445			-
Bacteria.Spirochaetota.Spirochaetia.Treponematales.Treponemataceae.Treponema_B.Treponema_B_986142_vincentii	2.01256			-
Bacteria.Firmicutes_C.Negativicutes.Acidaminococcales.Acidaminococcaceae	0			-
Bacteria.Proteobacteria.Gammaproteobacteria.Burkholderiales.Burkholderiaceae_A.Herbaspirillum	2.60231			-
Bacteria.Proteobacteria.Gammaproteobacteria.Burkholderiales.Burkholderiaceae_A.Pseudoduganella	0			-
Bacteria.Armatimonadota.Fimbriimonadia	0			-
Bacteria.Patescibacteria.Saccharimonadia.Saccharimonadales.Nanosynbacteraceae.Nanosynbacter	3.32058			-
Bacteria.Bacteroidota.Bacteroidia.Flavobacteriales.Flavobacteriaceae.Capnocytophaga.Capnocytophaga_leadbetteri	3.37231	AC	3.0544	0.0415272605671
Bacteria.Acidobacteriota.Acidobacteriae	3.23449			-
Bacteria.Bacteroidota.Bacteroidia.Bacteroidales.Bacteroidaceae.Prevotella.Prevotella_veroralis	2.04794			-
Bacteria.Actinobacteriota.Acidimicrobiia.UBA5794.UBA5794.SZUA_442.SZUA_442_sp003235475	0			-
Bacteria.Bacteroidota.Bacteroidia.Bacteroidales.Muribaculaceae.UBA7173.UBA7173_sp900540205	0.444167			-
Bacteria.Firmicutes_D.Bacilli.Erysipelotrichales.Erysipelotrichaceae.Bulleidia.Bulleidia_moorei	3.82573			-
Bacteria.Gemmatimonadota.Gemmatimonadetes.Longimicrobiales.RSA9	0.234641			-
Bacteria.Proteobacteria.Gammaproteobacteria.Burkholderiales.Neisseriaceae.Neisseria.Neisseria_oralis	2.9975			-
Bacteria.Proteobacteria.Gammaproteobacteria.Burkholderiales.Burkholderiaceae_A.Ottowia.Ottowia_sp001262075	3.05727			-
Bacteria.Bacteroidota.Bacteroidia.Bacteroidales.Muribaculaceae.Duncaniella.Duncaniella_dubosii	0.0273381385789			-
Bacteria.Actinobacteriota.Coriobacteriia.Coriobacteriales.Eggerthellaceae	2.60404			-
Bacteria.Firmicutes_A.Clostridia.Oscillospirales.Oscillospiraceae	3.67861			-
Bacteria.Firmicutes_C.Negativicutes.Acidaminococcales	0			-
Bacteria.Proteobacteria.Alphaproteobacteria.Sphingomonadales.Sphingomonadaceae.Sphingomonas_L.Sphingomonas_L_486704_paucimobilis	2.30633			-
Bacteria.Actinobacteriota.Actinomycetia.Actinomycetales.Actinomycetaceae.Peptidiphaga.Peptidiphaga_gingivicola	3.68665			-
Bacteria.Bacteroidota.Bacteroidia.Bacteroidales.Muribaculaceae.Duncaniella.Duncaniella_muris	2.00998			-
Bacteria.Bacteroidota.Bacteroidia.Bacteroidales.Bacteroidaceae.Prevotella.Prevotella_nigrescens	2.92576			-
Bacteria.Firmicutes_A.Clostridia.Lachnospirales.Lachnospiraceae.Ruminococcus_B	0.0956254204209			-
Bacteria.Proteobacteria.Gammaproteobacteria.Xanthomonadales.Xanthomonadaceae.Stenotrophomonas_A.Stenotrophomonas_A_615274_humi	0.2616			-
Bacteria.Gemmatimonadota.Gemmatimonadetes.Gemmatimonadales.GWC2_71_9.DSTP01.DSTP01_sp011362545	0.0212241963316			-
Bacteria.Proteobacteria.Gammaproteobacteria.Pseudomonadales.DT_91.DT_91	0			-
Bacteria.Cyanobacteria.Vampirovibrionia.Gastranaerophilales.Gastranaerophilaceae.Zag111.Zag111_sp001899395	1.9548			-
Bacteria.Fusobacteriota.Fusobacteriia.Fusobacteriales.Leptotrichiaceae.Oceanivirga	0.0674184409133			-
Bacteria.Verrucomicrobiota.Verrucomicrobiae.Verrucomicrobiales.Akkermansiaceae	2.97707			-
Bacteria.Proteobacteria.Alphaproteobacteria.Rs_D84.Rs_D84	0.330025			-
Bacteria.Firmicutes_D.Bacilli.Lactobacillales.Streptococcaceae.Streptococcus.Streptococcus_sanguinis_H	3.25817			-
Bacteria.Firmicutes_A.Clostridia.Peptostreptococcales.Filifactoraceae.Filifactor	3.03686			-
Bacteria.Acidobacteriota.Vicinamibacteria	0.0781127812587			-
Bacteria.Firmicutes_A.Clostridia.Christensenellales	1.51969			-
Bacteria.Firmicutes_D.Bacilli.Lactobacillales	5.50705			-
Bacteria.Firmicutes_D.Bacilli.Mycoplasmatales.Metamycoplasmataceae	1.42713			-
Bacteria.Cyanobacteria.Cyanobacteriia.Cyanobacteriales.Chroococcidiopsidaceae.Chroococcidiopsis	1.3175			-
Bacteria.Bacteroidota.Bacteroidia.Bacteroidales.Bacteroidaceae.Prevotella.Prevotella_loescheii	2.40285			-
Bacteria.Firmicutes_A.Clostridia.Lachnospirales.Lachnospiraceae.Lachnoanaerobaculum.Lachnoanaerobaculum_saburreum	0.789165			-
Bacteria.Proteobacteria.Gammaproteobacteria.Enterobacterales_A.Pasteurellaceae.Haemophilus_A.Haemophilus_A_paraphrohaemolyticus	4.53901	NC	4.17453	0.0305544
Bacteria.Fusobacteriota.Fusobacteriia.Fusobacteriales.Leptotrichiaceae.Streptobacillus	0.684037			-
Bacteria.Proteobacteria.Gammaproteobacteria.Enterobacterales_A.Pasteurellaceae.Haemophilus_D.Haemophilus_D_736121_seminalis	0.399443			-
Bacteria.Firmicutes_A.Clostridia.Lachnospirales.Lachnospiraceae.Oribacterium	3.86856			-
Bacteria.Firmicutes_A.Clostridia.Clostridiales	3.03621			-
Bacteria.Desulfobacterota_G.Desulfuromonadia	2.87794			-
Bacteria.Firmicutes_D.Bacilli.Bacillales_B.Anoxybacillaceae	3.9515			-
Bacteria.Actinobacteriota.Actinomycetia.Propionibacteriales.Propionibacteriaceae.Propionibacterium.Propionibacterium_acidifaciens	1.17175			-
Bacteria.Bacteroidota.Bacteroidia.Bacteroidales.Bacteroidaceae.Prevotella	4.69407			-
Bacteria.Firmicutes_A.Clostridia.Christensenellales.CAG_917	1.09901			-
Bacteria.Proteobacteria.Gammaproteobacteria.Burkholderiales.Burkholderiaceae_A.Hydrogenophaga.Hydrogenophaga_sp001713375	0.27112			-
Bacteria.Firmicutes_A.Clostridia.Lachnospirales.Lachnospiraceae.Ventrimonas	2.5307			-
Bacteria.Actinobacteriota.Thermoleophilia.UBA2241.UBA2241.PALSA_647	2.2069			-
Bacteria.Bacteroidota.Bacteroidia.Bacteroidales.Bacteroidaceae.Prevotella.Prevotella_scopos	1.86884			-
Bacteria.Bacteroidota.Bacteroidia.Bacteroidales.Bacteroidaceae.Prevotella.Prevotella_sp900113305	1.63821			-
Bacteria.Chloroflexota.Limnocylindria.QHBO01	1.47207			-
Bacteria.Proteobacteria.Gammaproteobacteria.Pseudomonadales.Moraxellaceae.Acinetobacter.Acinetobacter_defluvii	0			-
Bacteria.Firmicutes_C.Negativicutes.Selenomonadales.Selenomonadaceae.Selenomonas_B.Selenomonas_sputigena	3.13955			-
Bacteria.Firmicutes_A.Clostridia.Oscillospirales.CAG_272.Avispirillum	2.22386			-
Bacteria.Bacteroidota.Bacteroidia.Bacteroidales.Muribaculaceae.CAG_873.CAG_873_sp011959565	2.63429			-
Bacteria.Firmicutes_D.Bacilli.RF39.UBA660.Faecimonas	2.2782			-
Bacteria.Firmicutes_D.Bacilli.Staphylococcales.Staphylococcaceae.Staphylococcus.Staphylococcus_hominis	3.87019			-
Bacteria.Firmicutes_A.Clostridia.Oscillospirales.Oscillospiraceae.Enterenecus.Enterenecus_sp004560375	2.90415			-
Bacteria.Proteobacteria.Gammaproteobacteria.Cardiobacteriales	2.26926			-
Bacteria.Firmicutes_A.Clostridia.Peptostreptococcales.Anaerovoracaceae.BX12.BX12_sp902363595	0.246355			-
Bacteria.Firmicutes_A.Clostridia.Oscillospirales.Oscillospiraceae.Lawsonibacter.Lawsonibacter_sp000492175	0.562631			-
Bacteria.Firmicutes_D.Bacilli.Bacillales_B.DSM_18226.Bacillus_Z.Bacillus_Z_infernus	1.99341			-
Bacteria.Desulfobacterota_I.Desulfovibrionia.Desulfovibrionales.Desulfovibrionaceae	1.44187			-
Bacteria.Actinobacteriota.Actinomycetia.Actinomycetales.Micrococcaceae.Micrococcus	3.37988			-
Bacteria.Firmicutes_A.Clostridia.Tissierellales.Peptoniphilaceae	4.15615			-
Bacteria.Proteobacteria.Gammaproteobacteria.GCA_2729495	0			-
Bacteria.Proteobacteria.Gammaproteobacteria.Pseudomonadales.DT_91	0			-
Bacteria.Verrucomicrobiota.Verrucomicrobiae.Methylacidiphilales	1.8072			-
Bacteria.Proteobacteria.Alphaproteobacteria.RF32.CAG_239.51_20	0.241593			-
Bacteria.Bacteroidota.Rhodothermia	2.78446			-
Bacteria.Patescibacteria.Saccharimonadia	3.62903			-
Bacteria.Proteobacteria.Gammaproteobacteria.Burkholderiales.Burkholderiaceae_A.Herminiimonas	1.43124			-
Bacteria.Bacteroidota.Bacteroidia.Bacteroidales.Bacteroidaceae.Prevotella.Prevotella_aurantiaca	2.54158			-
Bacteria.Spirochaetota.Spirochaetia.Treponematales.Treponemataceae.Treponema_D	2.24084			-
Bacteria.Proteobacteria.Gammaproteobacteria.Pseudomonadales.Pseudomonadaceae.Pseudomonas_E.Pseudomonas_E_650326_aeruginosa_A	2.75083			-
Bacteria.Actinobacteriota.Thermoleophilia.Gaiellales.Gaiellaceae	2.82731			-
Bacteria.Patescibacteria.Saccharimonadia.Saccharimonadales.UBA1547.2011_GWC2_44_17	0			-
Bacteria.Proteobacteria.Gammaproteobacteria.Burkholderiales.Burkholderiaceae_A.Ralstonia.Ralstonia_pickettii_B	4.16224			-
Bacteria.Firmicutes_C.Negativicutes.Veillonellales.Megasphaeraceae.Anaeroglobus.Anaeroglobus_geminatus	3.48809			-
Bacteria.Firmicutes_B.Peptococcia.Peptococcales.BICA1_8.BICA1_8	2.59958			-
Bacteria.Firmicutes_D.Bacilli.Lactobacillales.Streptococcaceae.Streptococcus.Streptococcus_vestibularis	4.69334			-
Bacteria.Firmicutes_B.Peptococcia.Peptococcales.BICA1_8	2.59958			-
Bacteria.Bacteroidota.Bacteroidia.Bacteroidales.Bacteroidaceae.Prevotella.Prevotella_oris	3.53624			-
Bacteria.Firmicutes_D.Bacilli.Haloplasmatales_A.Turicibacteraceae	1.66605			-
Bacteria.Actinobacteriota.Actinomycetia.Mycobacteriales.Mycobacteriaceae.Corynebacterium.Corynebacterium_jeikeium	2.88047			-
Bacteria.Proteobacteria.Alphaproteobacteria.Rhodobacterales.Rhodobacteraceae.Tabrizicola	0.179572			-
Bacteria.Proteobacteria.Gammaproteobacteria.Pseudomonadales.Moraxellaceae.Moraxella_C	3.66243			-
Bacteria.Actinobacteriota.Actinomycetia.Mycobacteriales.Mycobacteriaceae.Lawsonella	3.53229			-
Bacteria.Proteobacteria.Alphaproteobacteria.Caulobacterales.Caulobacteraceae.Brevundimonas.Brevundimonas_fluminis	0.151761			-
Bacteria.Actinobacteriota.Actinomycetia.Mycobacteriales.Micromonosporaceae	3.41685			-
Bacteria.Firmicutes_D.Bacilli.Lactobacillales.Aerococcaceae.Abiotrophia.Abiotrophia_defectiva	2.96913			-
Bacteria.Acidobacteriota.Vicinamibacteria.Vicinamibacterales	0.0781127812587			-
Bacteria.Deferribacterota.Deferribacteres.Deferribacterales.Mucispirillaceae	2.64595			-
Bacteria.Bacteroidota.Bacteroidia.Bacteroidales.Tannerellaceae.Tannerella.Tannerella_serpentiformis	2.52903	AC	2.58906	0.0161912292966
Bacteria.Proteobacteria.Gammaproteobacteria.Burkholderiales.Burkholderiaceae_A.Lautropia	3.57957			-
Bacteria.Proteobacteria.Gammaproteobacteria.Burkholderiales.Burkholderiaceae_A.Comamonas_F.Comamonas_F_589250_testosteroni_B	3.6095			-
Bacteria.Armatimonadota.Fimbriimonadia.Fimbriimonadales	0			-
Bacteria.Actinobacteriota.Actinomycetia.Sporichthyales	0			-
Bacteria.Firmicutes_A.Clostridia.Oscillospirales.Oscillospiraceae.Faecousia.Faecousia_sp000434635	1.11033			-
Bacteria	6			-
Bacteria.Spirochaetota.Spirochaetia.Sphaerochaetales	0.0289952729563			-
Bacteria.Cyanobacteria.Cyanobacteriia.Cyanobacteriales.Coleofasciculaceae.SIO2C1	1.97451			-

[truncated: 4 more sheets: TableS11, TableS12, TableS13, TableS14]
